# Supplementary material for: Automated QuEChERS for the determination of 482 pesticide residues in Radix codonopsis by GC-Q-TOF/MS and LC-Q-TOF/MS
Source: Royal Society of Chemistry journal article supplement (doi:10.1039/d1ay01616d), 2021-01-01
Supplement: d1ay01616d1.pdf [file d1ay01616d1.pdf]

**Supplemental Table 1** The retention time, linear equations, correlation coefficient and product ion for 379 pesticides determined by LC-Q-TOFMS

| No. | Pesticides                | Elemental composition | Rt/min | Linear equations               | Correlation coefficient (R <sup>2</sup> ) | Precursor | Product ion                                 |
|-----|---------------------------|-----------------------|--------|--------------------------------|-------------------------------------------|-----------|---------------------------------------------|
| 1   | 1-Naphthyl Acetamide      | C12H11NO              | 4.456  | y=0.024783x-0.003124           | 0.9942                                    | 186.0913  | 115.0542,141.0699,142.0733,116.0576,91.0542 |
| 2   | 2,6-Dichlorobenzamide     | C7H5Cl2NO             | 3.116  | y=0.003082x-9.245050E-004      | 0.9950                                    | 189.9821  | 172.9556,108.9840,144.9606,74.0151,100.0182 |
| 3   | 3,4,5-Trimethacarb        | C11H15NO2             | 7.181  | y=0.060431x-0.004187           | 0.9907                                    | 194.1176  | 137.0961,122.0726,109.1012,67.0542,55.0542  |
| 4   | 6-Isopentenyl aminopurine | C10H13N5              | 3.439  | y=0.077057x-0.008831           | 0.9902                                    | 204.1244  | 136.0618,69.0699,148.0618,137.0636,119.0352 |
| 5   | Akton                     | C12H14Cl3O3PS         | 18.036 | y=0.004092x-1.614208E-004      | 0.9964                                    | 374.9540  | 96.9508,124.9821,153.0134,348.9198,346.9227 |
| 6   | Aldicarb-sulfone          | C7H14N2O4S            | 2.625  | y=0.052194x-0.003355           | 0.9839                                    | 223.0747  | 62.9899,86.0600,59.0491,58.0287,76.0393     |
| 7   | Aldicarb-sulfoxide        | C7H14N2O3S            | 2.261  | y =0.0001x-0.00019             | 0.9487                                    | 207.0798  | 89.0419,49.0106,46.9950,58.0287,65.0056     |
| 8   | Allidochlor               | C8H12ClNO             | 4.923  | y=0.009911x+0.011239           | 0.7690                                    | 174.0680  | 98.0964,56.0495,58.0651,76.9789,70.0651     |
| 9   | Ametryn                   | C9H17N5S              | 6.688  | y=0.830644x-0.047664           | 0.9986                                    | 228.1277  | 186.0808,68.0243,71.0604,96.0556,74.0059    |
| 10  | Amidosulfuron             | C9H15N5O7S2           | 6.014  | y=0.041843x-0.001970           | 0.9987                                    | 370.0486  | 261.0288,139.0376,218.0230,69.0083,127.0502 |
| 11  | Aminocarb                 | C11H16N2O2            | 2.157  | y=0.107714x-0.008440           | 0.9884                                    | 209.1285  | 137.0835,152.1070,122.0600,136.0757,94.0651 |
| 12  | Ancymidol                 | C15H16N2O2            | 5.157  | y=0.099929x-0.001833           | 0.9986                                    | 257.1285  | 81.0447,135.0441,54.0338,107.0491,121.0648  |
| 13  | Anilofos                  | C13H19ClNO3PS2        | 14.744 | y=0.278381x-0.016035           | 0.9980                                    | 368.0305  | 124.9821,198.9647,170.9698,156.9541,78.9943 |
| 14  | Aramite                   | C15H23ClO4S           | 17.347 | y=7.544803E-004x-9.345558E-005 | 0.9843                                    | 352.1344  | 191.1430,111.0474,83.0855,193.1223,135.0804 |
| 15  | Atraton                   | C9H17N5O              | 4.313  | y=0.709890x-0.047357           | 0.9969                                    | 212.1506  | 68.0243,170.1036,100.0505,57.0447,69.0083   |
| 16  | Atrazine-desethyl         | C6H10ClN5             | 3.677  | y=0.017835x-0.002359           | 0.9957                                    | 188.0697  | 146.0228,68.0243,79.0058,104.0010,61.9792   |
| 17  | Atrazine-desisopropyl     | C5H8ClN5              | 2.937  | y=0.024747x-2.123759E-004      | 0.9907                                    | 174.0541  | 68.0243,96.0556,104.0010,132.0323,79.0058   |
| 18  | Azaconazole               | C12H11Cl2N3O2         | 6.754  | y=0.104602x-0.004254           | 0.9993                                    | 300.0301  | 158.9763,230.9974,172.9556,70.0400,122.9996 |
| 19  | azadirachtin              | C35H44O16             | 6.429  | y=0.011539x+9.734910E-004      | 0.9983                                    | 743.2522  | 565.1704,665.2228,725.2407,625.1916,83.0491 |
| 20  | Azimsulfuron              | C13H16N10O5S          | 6.581  | y=0.087567x-0.003026           | 0.9996                                    | 425.1099  | 182.0560,139.0489,83.0240,155.9988,227.0339 |
| 21  | Aziprotryne               | C7H11N7S              | 9.559  | y=0.132004x-0.005120           | 0.9987                                    | 226.0869  | 68.0243,156.0338,125.0822,89.0168,58.0651   |
| 22  | Beflubutamid              | C18H17F4NO2           | 14.318 | y=0.041342x-5.704840E-004      | 0.9997                                    | 356.1268  | 91.0542,162.0913,177.1148,65.0386,221.0584  |
| 23  | Benalaxyl                 | C20H23NO3             | 14.052 | y=0.530541x-0.032163           | 0.9984                                    | 326.1751  | 91.0542,148.1121,208.1332,294.1489,121.0886 |
| 24  | Bendiocarb                | C11H13NO4             | 5.741  | y=0.015469x+4.082036E-005      | 0.9927                                    | 224.0917  | 81.0335,109.0284,167.0703,53.0386,59.0491   |
| 25  | Benodanil                 | C13H10INO             | 8.287  | y=0.178853x-0.002745           | 0.9990                                    | 323.9880  | 230.9301,202.9352,76.0308,105.0335,104.0257 |
| 26  | Benoxacor                 | C11H11Cl2NO2          | 9.74   | y=0.004275x-0.001203           | 0.9865                                    | 260.0240  | 120.0444,134.0600,149.0835,106.0651,82.9450 |
| 27  | Bensulide                 | C14H24NO4PS3          | 15.158 | y=0.051703x-0.001597           | 0.9995                                    | 398.0678  | 313.9736,77.0386,158.0270,218.0304,141.0005 |

| No. | Pesticides             | Elemental composition | Rt/min | Linear equations          | Correlation coefficient (R <sup>2</sup> ) | Precursor | Product ion                                  |
|-----|------------------------|-----------------------|--------|---------------------------|-------------------------------------------|-----------|----------------------------------------------|
| 28  | Benzobicyclon          | C22H19ClO4S2          | 12.993 | y=0.238077x-0.010775      | 0.9989                                    | 447.0486  | 257.0631,411.0719,258.0663,109.0107,259.0618 |
| 29  | Benzovindiflupyr       | C18H15Cl2F2N3O        | 14.366 | y=0.175731x-0.008260      | 0.9992                                    | 398.0633  | 159.0364,342.0804,378.0571,344.0780,330.0195 |
| 30  | Benzoylprop            | C16H13Cl2NO3          | 9.286  | y=0.006410x-6.199676E-004 | 0.9968                                    | 338.0345  | 105.0335,77.0386,188.0028,189.9999,106.0369  |
| 31  | Benzoylprop-Ethyl      | C18H17Cl2NO3          | 15.18  | y=0.062794x-0.002844      | 0.9990                                    | 366.0658  | 105.0335,77.0386,320.0240,51.0229            |
| 32  | Bitertanol             | C20H23N3O2            | 12.674 | y=0.050504x-9.181565E-004 | 0.9962                                    | 338.1863  | 70.0400,99.0804,269.1536,57.0699,153.0699    |
| 33  | Boscalid               | C18H12Cl2N2O          | 11.199 | y=0.055426x-8.254602E-004 | 0.9993                                    | 343.0399  | 271.0866,307.0633,272.0944,111.9949,78.0338  |
| 34  | Brodifacoum            | C31H23BrO3            | 18.802 | y=0.034913x-0.001059      | 0.9982                                    | 523.0903  | 256.1247,337.0411,335.0430,175.0390,189.0546 |
| 35  | Bromacil               | C9H13BrN2O2           | 4.781  | y=0.002550x-3.023146E-004 | 0.9834                                    | 261.0233  | 204.9607,131.9443,54.0338,187.9342,161.9549  |
| 36  | Bromadiolon            | C30H23BrO4            | 16.297 | y=0.006417 x - 0.001615   | 0.9916                                    | 549.0672  | 273.0546,274.0580,185.0233                   |
| 37  | Bromfenvinfos-Methyl   | C10H10BrCl2O4P        | 11.021 | y=0.018422x-4.075994E-004 | 0.9988                                    | 374.8950  | 127.0155,169.9685,109.0051,248.8868,94.9894  |
| 38  | Bromobutide            | C15H22BrNO            | 13.752 | y=0.057818x-0.003164      | 0.9972                                    | 312.0958  | 119.0855,194.0175,139.9529,137.9549,91.0542  |
| 39  | Bromuconazole          | C13H12BrCl2N3O        | 10.312 | y=0.027617x-0.001646      | 0.9984                                    | 375.9614  | 158.9763,70.0400,172.9556,227.0007,306.9273  |
| 40  | Bupirimate             | C13H24N4O3S           | 12.67  | y=1.071121x-0.066077      | 0.9985                                    | 317.1642  | 44.0495,166.0975,108.0114,210.1601,96.0444   |
| 41  | Butafenacil            | C20H18ClF3N2O6        | 14.18  | y=0.180775x-0.012843      | 0.9974                                    | 492.1144  | 331.0092,349.0197,333.0067,475.0878,351.0172 |
| 42  | Butamifos              | C13H21N2O4PS          | 16.465 | y=0.038883x-0.001339      | 0.9983                                    | 333.1032  | 95.9668,152.0293,180.0607,260.0141,231.9828  |
| 43  | Butocarboxim-Sulfoxide | C7H14N2O3S            | 2.145  | y=0.007255x+9.756283E-004 | 0.9841                                    | 207.0798  | 46.9950,75.0263,68.0495,88.0215,44.9793      |
| 44  | Cadusafos              | C10H23O2PS2           | 14.62  | y=0.140668x-0.005138      | 0.9989                                    | 271.0950  | 96.9508,130.9385,158.9698,215.0324,57.0699   |
| 45  | Cafenstrole            | C16H22N4O3S           | 12.779 | y=0.047225x+4.603080E-004 | 0.9994                                    | 351.1485  | 72.0444,100.0757,101.0787,73.0472            |
| 46  | Carbofuran             | C12H15NO3             | 5.793  | y=0.094197x-0.004093      | 0.9899                                    | 222.1125  | 123.0441,165.0910,77.0386,55.0542,91.0542    |
| 47  | Carbofuran-3-Hydroxy   | C12H15NO4             | 3.547  | y=0.006714x+0.005460      | 0.6065                                    | 238.1074  | 107.0491,163.0754,135.0804,181.0859,115.0542 |
| 48  | Carboxin               | C12H13NO2S            | 6.472  | y=0.202972x+1.588127E-004 | 0.9999                                    | 236.0740  | 93.0573,143.0161,86.9899,124.0215,77.0386    |
| 49  | Carfentrazone-ethyl    | C15H14Cl2F3N3O<br>3   | 14.241 | y=0.041454x-0.001464      | 0.9989                                    | 412.0437  | 345.9956,347.9929,302.0302,366.0018,367.9991 |
| 50  | Carpropamid            | C15H18Cl3NO           | 14.613 | y=0.022857x-5.487415E-004 | 0.9998                                    | 334.0527  | 139.0309,196.0291,198.0262,160.0524,81.0699  |
| 51  | Chlorbenzuron          | C14H10Cl2N2O2         | 12.865 | y=0.005750x-2.405377E-004 | 0.9989                                    | 309.0192  | 156.0211,138.9945,158.0182,140.9917,157.0242 |
| 52  | Chlordimeform          | C10H13ClN2            | 3.249  | y=0.074560x+0.008066      | 0.9935                                    | 197.0840  | 117.0573,152.0262,125.0153,116.0495,58.0651  |
| 53  | Chlorfenvinphos        | C10H10Cl3O4P          | 13.7   | y=0.086179x-0.005803      | 0.9970                                    | 358.9768  | 98.9843,155.0468,127.0155,169.9683,204.9371  |
| 54  | Chloridazon            | C10H8ClN3O            | 3.612  | y=0.054476x-0.003185      | 0.9975                                    | 222.0429  | 77.0386,65.0386,92.0495,104.0495,100.9901    |
| 55  | Chlorimuron-ethyl      | C15H15ClN4O6S         | 10.662 | y=0.131025x-0.004836      | 0.9996                                    | 415.0474  | 186.0060,83.0240,121.0284,184.9895,143.0002  |

| No. | Pesticides           | Elemental composition | Rt/min | Linear equations              | Correlation coefficient (R <sup>2</sup> ) | Precursor | Product ion                                  |
|-----|----------------------|-----------------------|--------|-------------------------------|-------------------------------------------|-----------|----------------------------------------------|
| 56  | Chlorphonium         | C19H32Cl2P            | 14.194 | y=1.262013x-0.084797          | 0.9980                                    | 362.1691  | 361.1613,76.0436,363.1587,158.9763,160.9734  |
| 57  | Chlorphoxim          | C12H14ClN2O3PS        | 16.4   | y=0.003682x-2.694268E-004     | 0.9988                                    | 333.0224  | 96.9508,110.9994,163.0053,124.9821,75.0229   |
| 58  | Chlorsulfuron        | C12H14ClN2O3PS        | 5.936  | y=0.045476x-0.002479          | 0.9982                                    | 358.0371  | 56.0495,141.0771,167.0564,110.9996,58.0287   |
| 59  | Cimidon-Ethyl        | C19H17Cl2NO4          | 17.011 | y=0.0003459454-1.788104E-004  | 0.6038                                    | 394.0607  | 107.0491,348.0189,79.0542,366.0294,77.0386   |
| 60  | Clodinafop           | C14H11ClFNO4          | 8.31   | y=0.008235x- 0.0006427265     | 0.9989                                    | 312.0433  | 266.0379,268.0353,239.0144,267.0411,222.0116 |
| 61  | Clodinafop-propargyl | C17H13ClFNO4          | 15.087 | y=0.071633x-0.002263          | 0.9997                                    | 350.0590  | 91.0542,266.0367,222.0105,238.0418,159.0479  |
| 62  | Clofencet            | C13H11ClN2O3          | 6.31   | y=0.021514x-4.186275E-004     | 0.9991                                    | 279.0531  | 166.0418,261.0425,263.0399,168.0390,262.0456 |
| 63  | Clomazone            | C12H14ClNO2           | 7.907  | y=0.085083x-0.003130          | 0.9976                                    | 240.0786  | 125.0153,89.0386,98.9996,90.0464,126.0231    |
| 64  | Clomeprop            | C16H15Cl2NO2          | 16.567 | y=0.012414x-4.259705E-004     | 0.9983                                    | 324.0553  | 120.0808,203.0025,148.0757,204.9996,121.0839 |
| 65  | Cloransulam-Methyl   | C15H13ClFN5O5S        | 7.701  | y=0.077137x-0.002048          | 0.9996                                    | 430.0383  | 369.9807,398.0121,152.9976,400.0094,371.9781 |
| 66  | Coumaphos            | C14H16ClO5PS          | 15.571 | y=0.018216x-9.805136E-004     | 0.9982                                    | 363.0217  | 226.9926,306.9591,211.0155,225.9848,334.9904 |
| 67  | coumaphos-oxon       | C14H16ClO6P           | 8.294  | y=0.093510x-0.001987          | 0.9995                                    | 347.0446  | 211.0157,290.9820,137.0153,165.0102,292.9795 |
| 68  | Crufomate            | C12H19ClNO3P          | 10.7   | y=0.572764x-0.024357          | 0.9993                                    | 292.0864  | 108.0209,236.0238,57.0699,238.0211,260.0602  |
| 69  | Cyanazine            | C9H13ClN6             | 5.143  | y=0.081235x+8.134993E-004     | 0.9984                                    | 241.0963  | 68.0243,214.0854,71.0604,104.0010,96.0556    |
| 70  | Cyazofamid           | C13H13ClN4O2S         | 14.217 | y=0.030898x-4.344388E-004     | 0.9994                                    | 325.0521  | 108.0114,216.0323,190.0292,182.0713,155.0604 |
| 71  | Cycloate             | C11H21NOS             | 15.349 | y=0.014132x-2.445511E-004     | 0.9862                                    | 216.1417  | 55.0542,83.0855,63.0263,154.1226,72.0444     |
| 72  | Cycluron             | C11H22N2O             | 6.404  | y=0.469723x-0.017673          | 0.9994                                    | 199.1805  | 72.0444,69.0699,89.0709,55.0542,56.0131      |
| 73  | Cyenopyrafen         | C24H31N3O2            | 18.594 | y=1.148579x-0.068748          | 0.9982                                    | 394.2489  | 310.1914,254.1301,57.0699,294.1601,184.0757  |
| 74  | Cyflufenamid         | C20H17F5N2O2          | 16.565 | y=0.051628x-0.002433          | 0.9978                                    | 413.1283  | 203.0227,241.0395,295.0864,223.0289,221.0321 |
| 75  | Cymiazole            | C12H14N2S             | 3.846  | y=0.179826x-0.038982          | 0.9822                                    | 219.0950  | 77.0386,144.0808,130.0651,105.0699,120.0808  |
| 76  | Cymoxanil            | C7H10N4O3             | 4.179  | y=0.0007871132x-6.227709E-004 | 0.9994                                    | 199.0826  | 53.0134,111.0189,128.0455,83.0240,58.0287    |
| 77  | Cyprazine            | C9H14ClN5             | 6.364  | y=0.209943x-0.001717          | 0.9994                                    | 228.1010  | 186.0541,108.0556,68.0243,83.0604,56.0495    |
| 78  | Cyproconazole        | C15H18ClN3O           | 9.118  | y=0.092243x-0.003687          | 0.9987                                    | 292.1211  | 70.0400,125.0153,126.0212,89.0386,110.9996   |
| 79  | Cyprofuram           | C14H14ClNO3           | 6.844  | y=0.124302x-0.005570          | 0.9990                                    | 280.0735  | 69.0340,130.0651,131.0730,184.0519,166.0413  |
| 80  | Cyromazine           | C6H10N6               | 1.534  | y=0.019564x+8.281125E-004     | 0.9944                                    | 167.1040  | 85.0509,60.0556,68.0243,83.0604,125.0822     |
| 81  | Daimuron             | C17H20N2O             | 11.163 | y=0.456244x-0.024444          | 0.9991                                    | 269.1648  | 91.0542,119.0855,151.0866,108.0808,106.0651  |
| 82  | Desmetryn            | C8H15N5S              | 5.209  | y=0.950583x-0.044510          | 0.9991                                    | 214.1121  | 172.0651,82.0400,57.0447,68.0243,91.0324     |
| 83  | Diallate             | C10H17Cl2NOS          | 16.691 | y=0.005218x-6.554210E-004     | 0.9941                                    | 270.0481  | 86.0600,108.9606,128.1070,110.9577,142.9483  |

| No. | Pesticides                   | Elemental composition | Rt/min | Linear equations          | Correlation coefficient (R <sup>2</sup> ) | Precursor | Product ion                                  |
|-----|------------------------------|-----------------------|--------|---------------------------|-------------------------------------------|-----------|----------------------------------------------|
| 84  | Diazinon                     | C12H21N2O3PS          | 14.971 | y=0.469267x-0.025445      | 0.9984                                    | 305.1083  | 96.9508,169.0794,153.1022,249.0454,277.0770  |
| 85  | Dibutyl succinate            | C12H22O4              | 14.176 | y=0.002172x-5.432691E-004 | 0.9805                                    | 231.1591  | 101.0233                                     |
| 86  | Dichlormid                   | C8H11Cl2NO            | 6.707  | y=0.002225x-3.303057E-004 | 0.9916                                    | 208.0290  | 84.0808,100.1121,98.0964,86.0964,58.0651     |
| 87  | Diclobutrazol                | C15H19Cl2N3O          | 11.649 | y=0.061545x-0.002975      | 0.9985                                    | 328.0978  | 70.0400,158.9763,59.0491,69.0699,57.0699     |
| 88  | Diclocymet                   | C15H18Cl2N2O          | 13.362 | y=0.001600x-8.139587E-004 | 0.9254                                    | 313.0869  | 172.9919,174.9890,114.0913,141.1022,100.1121 |
| 89  | Diclosulam                   | C13H10Cl2FN5O3<br>S   | 8.156  | y=0.030586x-0.002019      | 0.9984                                    | 405.9938  | 160.9794,377.9625,223.9327,314.0006,175.9658 |
| 90  | Diethyl Aminoethyl Hexanoate | C12H25NO2             | 3.949  | y=0.091409x-0.007503      | 0.9933                                    | 216.1958  | 143.1067,100.1121,71.0855,72.0808,118.1226   |
| 91  | Diethyltoluamide             | C12H17NO              | 6.635  | y=0.625923x-0.014661      | 0.9995                                    | 192.1383  | 91.0542,119.0491,65.0386,44.0131,72.0444     |
| 92  | Difenacoum                   | C31H24O3              | 17.976 | y=0.128006x-0.009452      | 0.9954                                    | 445.1798  | 179.0855,257.1325,175.0390,258.1359,291.1016 |
| 93  | Difenoconazole               | C19H17Cl2N3O3         | 14.57  | y=0.138539x-0.006582      | 0.9985                                    | 406.0720  | 251.0025,252.9997,337.0393,339.0366,252.0059 |
| 94  | Difenoaxuron                 | C16H18N2O3            | 7.009  | y=0.583073x-0.034350      | 0.9980                                    | 287.1390  | 72.0444,46.0651,123.0441,95.0491,214.0863    |
| 95  | Diflufenican                 | C19H11F5N2O2          | 16.288 | y=0.013957x-8.936309E-004 | 0.9997                                    | 395.0813  | 266.0412,238.0463,246.0350,218.0401,183.0416 |
| 96  | Dimethachlor                 | C13H18ClNO2           | 7.636  | y=0.209510x-0.007632      | 0.9994                                    | 256.1099  | 148.1121,224.0837,105.0699,132.0808,48.9840  |
| 97  | Dimethametryn                | C11H21N5S             | 10.934 | y=1.324929x-0.071824      | 0.9987                                    | 256.1590  | 186.0808,68.0243,71.0604,96.0556,91.0324     |
| 98  | Dimethenamid                 | C12H18ClNO2S          | 9.562  | y=0.185919x-0.010335      | 0.9980                                    | 276.0820  | 244.0557,111.0263,126.0372,168.0842,45.0335  |
| 99  | Dimethomorph                 | C21H22ClNO4           | 8.727  | y=0.198956x-0.008929      | 0.9990                                    | 388.1310  | 165.0546,301.0626,138.9945,70.0287,242.0493  |
| 100 | Dimethylvinphos (E)          | C10H10Cl3O4P          | 11.412 | y=0.008651x-1.807386E-004 | 0.9984                                    | 330.9455  | 127.0155,109.0049,169.9685,171.9656,206.9344 |
| 101 | Dimethylvinphos (Z)          | C10H10Cl3O4P          | 10.493 | y=0.038237x-3.508269E-004 | 0.9997                                    | 330.9455  | 127.0155,206.9344,204.9373,169.9685,171.9656 |
| 102 | Dimetilan                    | C10H16N4O3            | 3.806  | y=0.063247x-0.001867      | 0.9934                                    | 241.1295  | 72.0444,196.0717,56.0131                     |
| 103 | Dinitramine                  | C11H13F3N4O4          | 14.955 | y=0.003753x-1.767729E-004 | 0.9964                                    | 323.0962  | 305.0856,215.0665,195.0603,289.0907,247.0426 |
| 104 | Dioxabenzofos                | C8H9O3PS              | 9.641  | y=15.391691x+0.059626     | 0.9966                                    | 217.0083  | 77.0386,107.0491,79.0542,186.9977,184.9821   |
| 105 | Dioxacarb                    | C11H13NO4             | 3.807  | y=0.003818x+0.005882      | 0.9023                                    | 224.0917  | 77.0386,123.0441,167.0703,95.0491,162.0550   |
| 106 | Dioxathion                   | C12H26O6P2S4          | 17.622 | y=0.019510x-7.721143E-004 | 0.9992                                    | 457.0160  | 96.9508,271.0222,124.9821,153.0134,184.9854  |
| 107 | Diphenamid                   | C16H17NO              | 7.857  | y=0.741208x-0.043124      | 0.9980                                    | 240.1383  | 134.0964,165.0699,152.0621,91.0542,167.0855  |
| 108 | Dipropetryn                  | C11H21N5S             | 11.506 | y=0.918472x-0.055681      | 0.9969                                    | 256.1590  | 102.0120,144.0338,214.1121,68.0243,172.0651  |
| 109 | Dipropyl Isocinchomerate     | C13H17NO4             | 10.244 | y=0.544680x-0.027419      | 0.9990                                    | 252.1230  | 164.0706,210.0761,192.0655,211.0793,165.0738 |
| 110 | Dithiopyr                    | C15H16F5NO2S2         | 17.166 | y=0.008871x-5.089910E-004 | 0.9974                                    | 402.0615  | 248.0351,354.0582,296.0363,312.0135,334.0519 |
| 111 | DMST                         | C9H14N2O2S            | 6.297  | y=0.003640x+2.540694E-004 | 0.9547                                    | 215.0849  | 77.0386,106.0651,79.0542,107.0730,151.1230   |

| No. | Pesticides             | Elemental composition | Rt/min | Linear equations           | Correlation coefficient (R <sup>2</sup> ) | Precursor | Product ion                                  |
|-----|------------------------|-----------------------|--------|----------------------------|-------------------------------------------|-----------|----------------------------------------------|
| 112 | Dodemorph              | C18H35NO              | 7.442  | y=0.889957x-0.023668       | 0.9976                                    | 282.2791  | 98.0964,116.1070,97.1012,117.1101            |
| 113 | Drazoxolon             | C10H8CIN3O2           | 12.194 | y=0.008033 x- 0.0002672055 | 0.9940                                    | 238.0378  | 130.0651,98.9996,126.0105,177.0214,131.0730  |
| 114 | Enestroburin           | C22H22CINO4           | 17.011 | y=0.355632x-0.026290       | 0.9973                                    | 400.1310  | 145.0648,205.0859,178.0418,180.0390,146.0682 |
| 115 | EPN                    | C14H14NO4PS           | 16.54  | y=0.012216x-3.836625E-004  | 0.9973                                    | 324.0454  | 296.0141,156.9872,62.9453,94.0413,110.0185   |
| 116 | Epoxiconazole          | C17H13CIFN3O          | 11.181 | y=0.140536x-0.004037       | 0.9997                                    | 330.0804  | 121.0448,141.0102,70.0400,122.0482,261.0477  |
| 117 | Eprinomectin B1b       | C49H73NO14            | 17.855 | y=0.001180x-3.119993E-004  | 0.9931                                    | 914.5260  | 186.1125,154.0863,144.1019,199.1117,298.1649 |
| 118 | EPTC                   | C9H19NOS              | 13.008 | y=0.001257x-4.422518E-005  | 0.8981                                    | 190.1260  | 128.1070,86.0600,162.1311,93.0699,89.0056    |
| 119 | Esprocarb              | C15H23NOS             | 17.201 | y=0.106374x-0.007475       | 0.9954                                    | 266.1573  | 91.0542,71.0855,196.0791,92.0576,72.0890     |
| 120 | Etaconazole            | C14H15Cl2N3O2         | 10.778 | y=0.052258x-8.057958E-005  | 0.9993                                    | 328.0614  | 158.9745,55.0542,204.9804,160.9753,186.9698  |
| 121 | Ethiofencarb           | C11H15NO2S            | 6.546  | y=0.006314x+0.001021       | 0.9814                                    | 226.0896  | 107.0491,77.0386,79.0542,164.0706,108.0478   |
| 122 | Ethiofencarb-sulfone   | C11H15NO4S            | 3.522  | y=0.019169x+0.002648       | 0.9962                                    | 258.0795  | 107.0491,77.0386,79.0542,108.0570,201.0580   |
| 123 | Ethiofencarb-sulfoxide | C11H15NO3S            | 3.157  | y=0.050601x+5.457084E-004  | 0.9975                                    | 242.0845  | 107.0491,77.0386,79.0542,185.0631,164.0706   |
| 124 | Ethofumesate           | C13H18O5S             | 11.965 | y=19.355391x+1.051677      | 0.9956                                    | 287.0948  | 121.0648,161.0597,259.0635,162.0675,241.0529 |
| 125 | Ethoprophos            | C8H19O2PS2            | 10.857 | y=0.231636x-0.009643       | 0.9989                                    | 243.0637  | 96.9508,130.9385172.9854,215.0324,201.0167   |
| 126 | Ethoxyquin             | C14H19NO              | 10.414 | y=0.481633x-0.029216       | 0.9989                                    | 218.1539  | 160.0757,174.0913,146.0600,133.0522,148.0757 |
| 127 | ethychlozate           | C11H11CIN2O2          | 7      | y=0.052215x-0.001303       | 0.9996                                    | 239.0582  | 165.0214,138.0105,110.9996,167.0186,140.0076 |
| 128 | Etofenprox             | C25H28O3              | 19.608 | y=0.017471x-8.627508E-004  | 0.9816                                    | 394.2377  | 135.0804,177.1274,107.0491,183.0804,149.0961 |
| 129 | Etoxazole              | C21H23F2NO2           | 18.166 | y=1.520812x-0.081869       | 0.9989                                    | 360.1770  | 141.0146,57.0699,304.1132,177.1274,113.0197  |
| 130 | Etrimfos               | C10H17N2O4PS          | 14.57  | y=0.269022x-0.014171       | 0.9981                                    | 293.0719  | 124.982,178.9943,265.0406,46.9950,56.0495,   |
| 131 | Famphur                | C10H16NO5PS2          | 9.351  | y=0.022532x-7.780911E-004  | 0.9997                                    | 326.0280  | 93.0100,217.0073,280.9702,44.0495,109.0049   |
| 132 | Fenamidone             | C17H17N3OS            | 10.844 | y=0.211954x-0.009983       | 0.9990                                    | 312.1165  | 92.0495,236.1182,65.0386,264.1131,103.0542   |
| 133 | Fenamiphos             | C13H22NO3PS           | 10.471 | y=0.563829x-0.022969       | 0.9995                                    | 304.1131  | 201.9848,217.0083,234.0345,276.0818,262.0661 |
| 134 | Fenamiphos-sulfone     | C13H22NO5PS           | 5.572  | y=0.225759x-0.007631       | 0.9991                                    | 336.1029  | 266.0247,308.0716,108.0573,188.0468,91.0545  |
| 135 | Fenamiphos-sulfoxide   | C13H22NO4PS           | 4.572  | y=0.203156x-0.002039       | 0.9996                                    | 320.1080  | 108.0573,233.0032,171.0474,292.0767,156.0240 |
| 136 | Fenazaquin             | C20H22N2O             | 18.424 | y=0.530956x-0.036111       | 0.9957                                    | 307.1805  | 57.0699,161.1325,146.1090,131.0855,147.0553  |
| 137 | Fenclorphos-Oxon       | C8H8Cl3O4P            | 10.303 | y=0.012479x-6.583171E-004  | 0.9973                                    | 304.9299  | 109.0049,78.9943,303.9220,259.8773,257.8802  |
| 138 | Fenfuram               | C12H11NO2             | 6.686  | y=0.115924x+5.763073E-005  | 0.9994                                    | 202.0863  | 109.0284,53.0386,83.0491,120.0444,77.0386    |
| 139 | Fenhexamid             | C14H17Cl2NO2          | 11.036 | y=0.034815x-0.001039       | 0.9997                                    | 302.0709  | 55.0542,97.1012,69.0699,143.0128,98.1090     |
| 140 | Fenothiocarb           | C13H19NO2S            | 12.838 | y=0.124847x-0.002108       | 0.9994                                    | 254.1209  | 72.0444,160.0791,161.0819,73.0472,149.0961   |

| No. | Pesticides                 | Elemental composition | Rt/min | Linear equations              | Correlation coefficient (R <sup>2</sup> ) | Precursor | Product ion                                  |
|-----|----------------------------|-----------------------|--------|-------------------------------|-------------------------------------------|-----------|----------------------------------------------|
| 141 | Fenoxaprop-Ethyl           | C18H16ClNO5           | 16.622 | y=0.222222x-0.013750          | 0.9968                                    | 362.0790  | 91.0542,288.0422,121.0648,103.0542,77.0386   |
| 142 | Fenoxaprop-P               | C18H16ClNO5           | 10.415 | y=0.024286x-4.741559E-004     | 0.9977                                    | 334.0477  | 94.0413,288.0422,121.0648,92.0257,262.0266   |
| 143 | Fenoxycarb                 | C17H19NO4             | 12.974 | y=0.039683x+1.557556E-004     | 0.9999                                    | 302.1387  | 88.0393,116.0706,44.0495,256.0968,70.0287    |
| 144 | Fenpropidin                | C19H31N               | 7.99   | y=1.782649x-0.109025          | 0.9986                                    | 274.2529  | 147.1168,86.0964,132.0934,57.0699,119.0855   |
| 145 | Fenpyrazamine              | C17H21N3O2S           | 11.839 | y=0.492287x-0.021557          | 0.9993                                    | 332.1427  | 189.0897,216.1131,230.1288,231.1366,131.0730 |
| 146 | Fensulfothion-Oxon-Sulfone | C11H17O6PS            | 4.794  | y=0.057701x-0.002668          | 0.9991                                    | 309.0556  | 252.9930,175.0155,281.0243,253.9961,254.9911 |
| 147 | Fentrazamide               | C16H20ClN5O2          | 15.233 | y=0.098935x+ 0.007874         | 0.9930                                    | 350.1378  | 55.0542,83.0855,154.1226,197.1284,72.0449    |
| 148 | Fenuron                    | C9H12N2O              | 3.587  | y=0.040950x-0.001672          | 0.9917                                    | 165.1022  | 72.0444,46.0651,77.0386,56.0131,44.0495      |
| 149 | Ferimzone                  | C15H18N4              | 5.466  | y=0.128510x+0.003767          | 0.9983                                    | 255.1604  | 132.0808,124.0869,117.0573,123.0791,96.0682  |
| 150 | Flamprop-isopropyl         | C19H19ClFNO3          | 15.102 | y=0.126646x-0.005935          | 0.9982                                    | 364.1110  | 105.0335,77.0386,304.0530,106.0413,172.0319  |
| 151 | Flonicamid                 | C9H6F3N3O             | 3.153  | y=0.002531x-3.747544E-004     | 0.9828                                    | 230.0536  | 203.0427,98.0401,148.0369,174.0161,146.0212  |
| 152 | Florasulam                 | C12H8F3N5O3S          | 5.856  | y=0.037935x-0.002449          | 0.9970                                    | 360.0373  | 129.0385,191.9914,130.0413,109.0318,128.0304 |
| 153 | Fluacrypyrim               | C20H21F3N2O5          | 16.687 | y=0.023946x-0.001152          | 0.9970                                    | 427.1475  | 145.0648,205.0859,117.0699,115.0542,146.0686 |
| 154 | Fluazifop                  | C15H12F3NO4           | 8.557  | y=0.037934x-8.262605E-004     | 0.9997                                    | 328.0791  | 91.0542,282.0736,254.0412,238.0463,65.0386   |
| 155 | Fluazifop-butyl            | C19H20F3NO4           | 17.646 | y=0.460236x-0.033773          | 0.9967                                    | 384.1417  | 91.0542,282.0725,328.0791,238.0474,254.0412  |
| 156 | Fluazuron                  | C20H10Cl2F5N3O3       | 17.392 | y=0.014999x-0.001042          | 0.9914                                    | 506.0092  | 141.0135,158.0401,348.9742,312.9980,152.9969 |
| 157 | Flubenzimine               | C17H10F6N4S           | 17.583 | y=0.010168x+0.001108          | 0.9823                                    | 417.0603  | 167.0415,397.0541,187.0478,77.0386,136.0213  |
| 158 | Flucarbazone               | C12H11F3N4O6S         | 4.365  | y=0.033757x-0.001321          | 0.9993                                    | 397.0424  | 130.0611,115.0376,131.0633,73.0396,129.0533  |
| 159 | Flucetosulfuron            | C18H22FN5O8S          | 7.494  | y=0.162026x-0.008294          | 0.9989                                    | 488.1246  | 156.0768,273.0340,182.0560,398.0929,307.0758 |
| 160 | Flucycloxuron              | C25H20ClF2N3O3        | 17.803 | y=0.023809x-2.022398E-004     | 0.9973                                    | 484.1234  | 132.0444,289.0783,290.0814,170.0412,133.0475 |
| 161 | Flufenacet                 | C14H13F4N3O2S         | 13.064 | y=0.074607x-0.002208          | 0.9994                                    | 364.0737  | 124.0557,152.0506,194.0976,109.0448,97.0448  |
| 162 | Flufenoxuron               | C21H11ClF6N2O3        | 17.788 | y=0.003246x-3.479785E-004     | 0.9937                                    | 489.0435  | 141.0146,158.0401,159.0441,142.0173,306.0298 |
| 163 | Flufenpyr-Ethyl            | C16H13ClF4N2O4        | 13.894 | y=0.080928x-0.003831          | 0.9983                                    | 409.0573  | 307.0256,335.0205,337.0179,309.0229,381.0260 |
| 164 | Flufiprole                 | C16H10Cl2F6N4O5       | 16.426 | y=0.0009394693x-8.039184E-005 | 0.9895                                    | 508.0195  | 404.9950,376.0600,406.9922,423.9934,387.0289 |
| 165 | Flumetralin                | C16H12ClF4N3O4        | 17.973 | y=0.0005185033x-3.578452E-004 | 0.8865                                    | 422.0525  | 143.0087,107.0303,108.0381,341.0908          |
| 166 | Flumetsulam                | C12H9F2N5O2S          | 4.116  | y=0.053662x-0.003173          | 0.9984                                    | 326.0518  | 129.0385,262.0899,128.0306,130.0413,109.0320 |
| 167 | Flumiclorac-Pentyl         | C21H23ClFNO5          | 17.492 | y=0.025345x-0.001077          | 0.9974                                    | 441.1587  | 308.0484,354.0539,424.1321,356.0516,310.0460 |

| No. | Pesticides              | Elemental composition | Rt/min | Linear equations              | Correlation coefficient (R <sup>2</sup> ) | Precursor | Product ion                                  |
|-----|-------------------------|-----------------------|--------|-------------------------------|-------------------------------------------|-----------|----------------------------------------------|
| 168 | Flumioxazin             | C19H15FN2O4           | 9.788  | y=0.002732x-8.770537E-004     | 0.9971                                    | 355.1089  | 148.0557,299.0826,81.0699,100.0757,204.0455, |
| 169 | Fluopyram               | C16H11ClF6N2O         | 12.15  | y=0.302929x-0.019125          | 0.9978                                    | 397.0537  | 173.0209,208.0135,145.0260,210.0107,170.0412 |
| 170 | Fluoroglycofen-ethyl    | C18H13ClF3NO7         | 17.141 | y=0.0003863177x-6.531661E-005 | 0.8455                                    | 465.0671  | 300.0034,343.9932,345.9908,302.0008,344.9964 |
| 171 | Fluquinconazole         | C16H8Cl2FN5O          | 11.419 | y=0.020933x-7.961274E-004     | 0.9995                                    | 376.0163  | 306.9836,108.0244,349.0054,351.0026,308.9808 |
| 172 | Flurochloridone         | C12H10Cl2F3NO         | 12.972 | y=0.004553x-2.828865E-004     | 0.9925                                    | 312.0164  | 53.0386,292.0102,89.0153,145.0260,172.0369   |
| 173 | fluroxypyr-meptyl       | C15H21Cl2FN2O3        | 18.23  | y=0.008043x-3.765405E-004     | 0.9993                                    | 367.0986  | 254.9723,180.9725,208.9674,236.9617,178.9574 |
| 174 | Flurprimidol            | C15H15F3N2O2          | 9.346  | y=0.093551x-0.002264          | 0.9993                                    | 313.1158  | 269.0533,270.0611,185.0709,295.1053,189.0158 |
| 175 | Flusilazole             | C16H15F2N3Si          | 12.384 | y=0.239370x-0.009309          | 0.9994                                    | 316.1076  | 165.0697,247.0749,219.0436,157.0280,125.0217 |
| 176 | Flutolanil              | C17H16F3NO2           | 12.895 | y=0.219080x-0.004201          | 0.9999                                    | 324.1206  | 262.0663,65.0386,242.0600,282.0725,93.0335   |
| 177 | Flutriafol              | C16H13F2N3O           | 6.377  | y=0.071443x-6.982328E-004     | 0.9995                                    | 302.1099  | 70.0400,123.0241,109.0448,95.0292 233.0773   |
| 178 | Fluxapyroxad            | C18H12F5N3O           | 11.388 | y=0.118410x-0.003353          | 0.9997                                    | 382.0973  | 342.0849,362.0911,314.0900,234.0525,363.0941 |
| 179 | Fonofos                 | C10H15OPS2            | 15.244 | y=0.003959x-4.714141E-004     | 0.9913                                    | 247.0375  | 80.9558,108.9871,62.9453,137.0184,77.0386    |
| 180 | Foramsulfuron           | C17H20N6O7S           | 4.975  | y=0.085301x-0.004539          | 0.9980                                    | 453.1187  | 182.0560,139.0502,83.0240,272.0693,255.0427  |
| 181 | Formetanate             | C11H15N3O2            | 1.876  | y=0.033643x+0.001755          | 0.9833                                    | 222.1237  | 165.1022,93.0335,65.0386,120.0444,109.0522   |
| 182 | Fuberidazole            | C11H8N2O              | 3.026  | y=0.346212x-0.025319          | 0.9902                                    | 185.0709  | 156.0682,157.0760,65.0386,155.0604,92.0495   |
| 183 | Furalaxyl               | C17H19NO4             | 9.281  | y=0.351109x-0.019520          | 0.9984                                    | 302.1387  | 95.0128,242.1176,270.1125,67.0178            |
| 184 | Furathiocarb            | C18H26N2O5S           | 17.281 | y=0.444679x-0.030996          | 0.9971                                    | 383.1635  | 195.0474,162.0675,167.0525,125.0056,164.0832 |
| 185 | Furmecyclox             | C14H21NO3             | 13.09  | y=0.390119x-0.019841          | 0.9988                                    | 252.1594  | 55.0542,110.0600,170.0812,83.0855,123.0441   |
| 186 | Griseofulvin            | C17H17ClO6            | 7.001  | y=0.201500x-0.005712          | 0.9987                                    | 353.0786  | 69.0335,165.0546,215.0106,285.0524,199.9871  |
| 187 | Halofenozide            | C18H19ClN2O2          | 10.158 | y=0.250077x-0.001455          | 0.9996                                    | 331.1208  | 105.0335,77.0386,138.9945,275.0582,110.9996  |
| 188 | Halosulfuron-methyl     | C13H15ClN6O7S         | 9.92   | y=0.057554x-0.003333          | 0.9984                                    | 435.0484  | 182.0560,83.0245,139.0502,403.0222,183.0587  |
| 189 | Haloxyfop               | C15H11ClF3NO4         | 11.999 | y=0.002659x-8.942253E-004     | 0.9828                                    | 362.0401  | 91.0542,316.0347,272.0073,288.0022,65.0386   |
| 190 | Haloxyfop-2-ethoxyethyl | C19H19ClF3NO5         | 17.076 | y=0.061120x-0.004691          | 0.9960                                    | 434.0977  | 91.0542,316.0347,272.0080,73.0653,288.0381   |
| 191 | Haloxyfop-methyl        | C19H19ClF3NO5         | 16.232 | y=0.025996x-0.001894          | 0.9957                                    | 376.0558  | 272.0085,316.0347,318.0321,288.0034,317.0379 |
| 192 | Hexazinone              | C12H20N4O2            | 4.646  | y=0.247091x+0.048650          | 0.9991                                    | 253.1659  | 71.0604,171.0876,85.0760,55.0542,83.0240     |
| 193 | Hydroprene              | C17H30O2              | 21.074 | y=0.001745x+7.050836E-004     | 0.9815                                    | 267.2319  | 55.0542,123.1168,109.1012,95.0855,69.0699    |
| 194 | Imazamethabenz-methyl   | C16H20N2O3            | 4.776  | y=0.712335x-0.038086          | 0.9987                                    | 289.1547  | 86.0964,144.0444,229.1335,161.0709,69.0699   |
| 195 | Imazosulfuron           | C14H13ClN6O5S         | 7.801  | y=0.037356x-8.612654E-004     | 0.9992                                    | 413.0429  | 156.0768,153.0214,257.9735,261.0288,218.0230 |

| No. | Pesticides          | Elemental composition | Rt/min | Linear equations              | Correlation coefficient (R <sup>2</sup> ) | Precursor | Product ion                                   |
|-----|---------------------|-----------------------|--------|-------------------------------|-------------------------------------------|-----------|-----------------------------------------------|
| 196 | Imibenconazole      | C17H13Cl3N4S          | 16.44  | y=0.033616x-0.002174          | 0.9955                                    | 410.9999  | 125.0153,171.0030,341.9672,70.0400,84.0556    |
| 197 | Imicyafos           | C11H21N4O2PS          | 4.767  | y=0.361114x-0.004523          | 0.9996                                    | 305.1196  | 201.0536,235.0413,139.0978,277.0883,202.0559  |
| 198 | Imidaclothiz        | C7H8ClN5O2S           | 3.807  | y=0.003669x-1.125224E-004     | 0.9908                                    | 262.0160  | 122.0713,181.0542,123.0791,131.9669,70.9950   |
| 199 | Imiprothrin         | C17H22N2O4            | 12.453 | y=0.049889x-7.126921E-004     | 0.9996                                    | 319.1652  | 151.1117,123.1168,210.1488,227.1754,182.1539  |
| 200 | Inabenfide          | C19H15ClN2O2          | 7.831  | y=0.059919x-0.001501          | 0.9980                                    | 339.0895  | 80.0495,321.0789,79.0416,323.0766,322.0821    |
| 201 | Indanofan           | C20H17ClO3            | 13.696 | y=0.004686x-1.955723E-004     | 0.9966                                    | 341.0939  | 175.0754,187.0754,323.0833,159.0804,176.0788  |
| 202 | Iodosulfuron-methyl | C14H14IN5O6S          | 7.815  | y=0.066228x-0.002594          | 0.9989                                    | 507.9782  | 167.0564,56.0495,141.0771,83.0240,260.9394    |
| 203 | Ipconazole          | C18H24ClN3O           | 14.154 | y=0.013141x+7.652130E-004     | 0.9988                                    | 334.1681  | 70.0400,125.0153,71.0478,109.1012             |
| 204 | Iprodione           | C13H13Cl2N3O3         | 12.449 | y=0.0006559229x-3.384501E-004 | 0.8233                                    | 330.0407  | 56.0131,244.9879,246.9851,173.9872,161.9872   |
| 205 | Isazofos            | C9H17ClN3O3PS         | 13.636 | y=0.303753x-0.020831          | 0.9974                                    | 314.0490  | 119.9957,96.9508,162.0424,124.9821,272.0020   |
| 206 | Isocarbamid         | C8H15N3O2             | 3.561  | y=0.018640x+0.001480          | 0.9967                                    | 186.1237  | 87.0553,70.0287,130.0611,59.0604,57.0699      |
| 207 | Isofenphos-Methyl   | C14H22NO4PS           | 15.288 | y=0.098973x-0.001754          | 0.9990                                    | 332.1080  | 121.0284,230.9868,137.0056,93.0335,109.9824   |
| 208 | Isomethiozin        | C12H20N4OS            | 13.349 | y=0.326852x-0.020247          | 0.9974                                    | 269.1431  | 57.0699,200.0852,89.0168,116.0277,84.0808     |
| 209 | Isoprocarb          | C11H15NO2             | 7.027  | y=0.057545x+0.003577          | 0.9895                                    | 194.1176  | 95.0491,77.0386,137.0961,152.0706,51.0229     |
| 210 | Isopropalin         | C15H23N3O4            | 18.802 | y=0.013866x+8.660636E-004     | 0.9997                                    | 310.1761  | 188.1308,226.0822,118.0624,160.0968,145.0760  |
| 211 | Isoprothiolane      | C12H18O4S2            | 12.231 | y=0.147036x-0.006875          | 0.9985                                    | 291.0719  | 144.9776,231.0144,188.9675,61.0106,88.9514    |
| 212 | Isoproturon         | C12H18N2O             | 6.632  | y=0.437626x-0.009106          | 0.9999                                    | 207.1492  | 72.0444,46.0651,165.1022,91.0542,134.0964     |
| 213 | Isoxadifen-ethyl    | C18H17NO3             | 14.451 | y=0.015163x-4.910890E-004     | 0.9985                                    | 296.1281  | 232.0757,203.0730,204.0808,,263.1067,176.0621 |
| 214 | Isoxaflutole        | C15H12F3NO4S          | 10.689 | y=0.0004658909x-2.280141E-004 | 0.9593                                    | 360.0512  | 250.9984,219.9800,204.0029,220.9879,252.0015  |
| 215 | Karbutilate         | C14H21N3O3            | 5.524  | y=0.402346x-0.015166          | 0.9996                                    | 280.1656  | 72.0444,181.0972,136.0393,93.0335,108.0444    |
| 216 | Maleic hydrazide    | C4H4N2O2              | 0.73   | y=0.011043x+0.056090          | 0.9836                                    | 113.0346  | 40.0182,67.0291,53.0022,55.0178,54.0100       |
| 217 | Mefenacet           | C16H14N2O2S           | 10.859 | y=0.415547x-0.023053          | 0.9983                                    | 299.0849  | 120.0808,148.0757,91.0542,192.011479.0542     |
| 218 | Mefenpyr-diethyl    | C16H18Cl2N2O4         | 15.57  | y=0.193837x-0.011939          | 0.9980                                    | 373.0716  | 159.9715,327.0298,144.9606,185.9872,132.9606  |
| 219 | Mepanipyrim         | C14H13N3              | 11.505 | y=0.983451x-0.034295          | 0.9996                                    | 224.1182  | 77.0386,106.0651,79.0542,104.0495,66.0338     |
| 220 | Mepronil            | C17H19NO2             | 12.208 | y=0.355447x-0.012750          | 0.9991                                    | 270.1489  | 91.0542119.0491,228.1019,229.1097,120.0570    |
| 221 | Metaflumizone       | C24H16F6N4O2          | 17.4   | y=0.006959x-6.852776E-004     | 0.9954                                    | 507.1250  | 178.0463,287.0791,116.0495,221.0521,267.0728  |
| 222 | Metalaxyl           | C15H21NO4             | 6.684  | y=0.363769x-0.010502          | 0.9994                                    | 280.1543  | 45.0335,192.1383,220.1332,160.1121,248.1281   |
| 223 | Metamifop           | C23H18ClFN2O4         | 16.44  | y=0.435353x-0.034374          | 0.9965                                    | 441.1012  | 288.0422,180.0819,152.0870,290.0397,126.0714  |



| No. | Pesticides         | Elemental composition | Rt/min | Linear equations               | Correlation coefficient (R <sup>2</sup> ) | Precursor | Product ion                                  |
|-----|--------------------|-----------------------|--------|--------------------------------|-------------------------------------------|-----------|----------------------------------------------|
| 224 | Metamitron         | C10H10N4O             | 3.468  | y=0.038685x-0.003165           | 0.9972                                    | 203.0927  | 104.0495,175.0978,77.0386,174.0788,57.0447   |
| 225 | Metazachlor        | C14H16ClN3O           | 7.48   | y=0.113219x-0.007980           | 0.9940                                    | 278.1055  | 134.0964,210.0662,105.0699,211.0740,135.1042 |
| 226 | Metconazole        | C17H22ClN3O           | 12.67  | y=0.170399x-0.006145           | 0.9990                                    | 320.1524  | 70.0400,125.0153,71.0478,177.0447,95.0855    |
| 227 | Methabenzthiazuron | C10H11N3OS            | 5.934  | y=0.047754x-0.003285           | 0.9979                                    | 222.0696  | 165.0481,150.0246,124.0215,123.0137,80.0495  |
| 228 | Methamidophos      | C2H8NO2PS             | 1.586  | y=0.010830x-0.001038           | 0.9967                                    | 142.0086  | 63.9947,94.0052,124.9821,78.9943,79.9896     |
| 229 | Methfuroxam        | C14H15NO2             | 9.307  | y=0.280119x-0.010522           | 0.9988                                    | 230.1176  | 137.0597,67.0542,111.0804,77.0386,95.0491    |
| 230 | Methoprotryne      | C11H21N5OS            | 6.576  | y=1.080238x-0.048240           | 0.9990                                    | 272.1540  | 170.0495,198.0808,240.1277,125.0822,230.1070 |
| 231 | Metobromuron       | C9H11BrN2O2           | 7.048  | y=0.022585x-3.949919E-004      | 0.9986                                    | 259.0077  | 91.0416,169.9600,148.0631,119.0604,170.9678  |
| 232 | Metribuzin         | C8H14N4OS             | 5.253  | y=0.023079x-0.005604           | 0.7813                                    | 215.0961  | 49.0106,57.0699,187.1012,46.9950,58.0400     |
| 233 | Metsulfuron-Methyl | C14H15N5O6S           | 5.525  | y=0.115402x-0.003170           | 0.9998                                    | 382.0816  | 167.0564,56.0495,135.0441,77.0386,58.0287    |
| 234 | Mexacarbate        | C12H18N2O2            | 3.858  | y=0.031844x-0.001484           | 0.9983                                    | 223.1441  | 151.0992,136.0757,166.1226,108.0808,134.0726 |
| 235 | Molinate           | C9H17NOS              | 9.956  | y=0.012142x-6.636000E-004      | 0.9911                                    | 188.1104  | 55.0542,126.0913,83.0855,98.0964,70.0651     |
| 236 | Monalide           | C13H18ClNO            | 13.657 | y=0.122469x-4.528613E-004      | 0.9990                                    | 240.1150  | 85.1012,93.0573,57.0699,128.0257,110.9996    |
| 237 | Monocrotophos      | C7H14NO5P             | 2.768  | y=0.029447x-0.001543           | 0.9963                                    | 224.0682  | 58.0287,127.0155,98.0600,109.0049,67.0182    |
| 238 | Monolinuron        | C9H11ClN2O2           | 6.569  | y=0.035737x-5.688367E-004      | 0.9993                                    | 215.0582  | 98.9996,126.0105,148.0631,127.0183,62.0600   |
| 239 | Monuron            | C9H11ClN2O            | 4.936  | y=0.106269x-0.006307           | 0.9976                                    | 199.0633  | 72.0444,46.0651,98.9996,126.0105,44.0495     |
| 240 | Myclobutanil       | C15H17ClN4            | 10.545 | y=0.103428x-7.049851E-004      | 0.9998                                    | 289.1215  | 70.0400,125.0153,151.0309,116.0620,220.0888  |
| 241 | Naphthalophos      | C16H16NO6P            | 8.45   | y=0.426705x-0.020868           | 0.9993                                    | 350.0788  | 214.0499,304.0369,276.0056,322.0475,294.0162 |
| 242 | Neburon            | C12H16Cl2N2O          | 13.14  | y=0.239331x-0.009940           | 0.9993                                    | 275.0712  | 57.0699,88.1121,58.0287,114.0913,159.9710    |
| 243 | Norflurazon        | C12H9ClF3N3O          | 7.052  | y=0.463035x-0.022949           | 0.9992                                    | 304.0459  | 140.0306,87.9949,160.0369,284.0397,102.0105  |
| 244 | Noruron            | C13H22N2O             | 7.247  | y=0.753023x-0.041390           | 0.9986                                    | 223.1805  | 72.0444,89.0709,135.1168,69.0699,136.1202    |
| 245 | Novaluron          | C17H9ClF8N2O4         | 16.656 | y=0.0003505723x-1.965297E-004  | 0.3825                                    | 493.0196  | 141.0146,158.0412,113.0197,140.0306,107.0491 |
| 246 | Noviflumuron       | C17H7Cl2F9N2O3        | 17.504 | y=0.0001905077x-2.287198E-004  | 1.0000                                    | 528.9763  | 158.0412,141.0146                            |
| 247 | Nuarimol           | C17H12ClFN2O          | 8.104  | y=0.071564x-0.001831           | 0.9989                                    | 315.0695  | 81.0447,243.0371,252.0819,288.0586,245.0345  |
| 248 | Ofurace            | C14H16ClNO3           | 6.65   | y=0.175827x-0.002577           | 0.9999                                    | 282.0891  | 160.1121,254.0942,148.1121,145.0886,178.1226 |
| 249 | Orbencarb          | C12H16ClNOS           | 14.852 | y=0.062453x-0.002288           | 0.9994                                    | 258.0714  | 125.0153,100.0757,89.0386,72.0444,98.9996    |
| 250 | Oxadiazyl          | C15H14Cl2N2O3         | 15.749 | y=8.238251E-004 x-0.0003653208 | 0.9493                                    | 341.0454  | 223.0031,229.9765,257.9746,221.9953,213.9821 |
| 251 | oxadiazon          | C15H18Cl2N2O3         | 17.647 | y=8.897920E-004x-3.395148E-    | 0.9923                                    | 345.0767  | 303.0298,184.9874,219.9563,176.9505,148.9556 |

| No. | Pesticides                        | Elemental composition | Rt/min | Linear equations               | Correlation coefficient (R <sup>2</sup> ) | Precursor | Product ion                                  |
|-----|-----------------------------------|-----------------------|--------|--------------------------------|-------------------------------------------|-----------|----------------------------------------------|
|     |                                   |                       |        | 004                            |                                           |           |                                              |
| 252 | Oxadixyl                          | C14H18N2O4            | 4.975  | y=0.167431x-0.004462           | 0.9991                                    | 279.1339  | 132.0808,133.0886,219.1128,45.0335,102.0550  |
| 253 | Oxasulfuron                       | C17H18N4O6S           | 5.256  | y=0.184332x-0.009939           | 0.9987                                    | 407.1020  | 150.0662,107.0604,124.0869,284.0210,209.9842 |
| 254 | Oxycarboxin                       | C12H13NO4S            | 4.409  | y=0.045588x-0.001595           | 0.9934                                    | 268.0638  | 175.0060,146.9747,83.0128,67.0178,68.9971    |
| 255 | Oxyfluorfen                       | C15H11ClF3NO4         | 17.491 | y=1.686131E-004x-2.697809E-004 | 1.0000                                    | 362.0401  | 237.0374,315.99832,97.9877,273.9877,252.0011 |
| 256 | Pebulate                          | C10H21NOS             | 15.321 | y=0.008109x+9.773801E-004      | 0.9950                                    | 204.1417  | 57.0699,128.1070,72.0444,176.1467,162.0947   |
| 257 | Penconazole                       | C13H15Cl2N3           | 12.415 | y=0.094878x-0.002784           | 0.9996                                    | 284.0716  | 70.0400,158.9763,122.9996,172.9919,159.9823  |
| 258 | Penflufen                         | C18H24FN3O            | 12.964 | y=0.575925x-0.023120           | 0.9994                                    | 318.1976  | 234.1037,141.0459,115.0666,57.0699,142.0486  |
| 259 | Penoxsulam                        | C16H14F5N5O5S         | 7.767  | y=0.517334x-0.028511           | 0.9991                                    | 484.0709  | 195.0751,194.0672,164.0567,166.0712,139.0500 |
| 260 | Pentanochlor                      | C13H18ClNO            | 13.475 | y=0.158324x-0.009289           | 0.9957                                    | 240.1150  | 107.0730,142.0413,71.0855,106.0651,127.0178  |
| 261 | Pethoxamid                        | C16H22ClNO2           | 12.367 | y=0.347812x-0.015590           | 0.9991                                    | 296.1412  | 91.0542,131.0855,250.0993,116.0620,251.1071  |
| 262 | Phorate                           | C7H17O2PS3            | 15.674 | y=23.907432x-0.129039          | 0.9953                                    | 261.0201  | 46.9950,75.0263,96.9508,142.9385,170.9698    |
| 263 | Phorate-Sulfone                   | C7H17O4PS3            | 8.564  | y=0.014808x-2.045123E-004      | 0.9986                                    | 293.0099  | 96.9508,124.9821,247.0222,153.0134,142.9385  |
| 264 | Phorate-Sulfoxide                 | C7H17O3PS3            | 6.287  | y=0.116850x-0.004366           | 0.9989                                    | 277.0150  | 96.9508,142.9385,199.0011,170.9698,153.0134  |
| 265 | Phosfolan                         | C7H14NO3PS2           | 4.126  | y=0.141001x-0.009115           | 0.9973                                    | 256.0225  | 139.9566,167.9879,61.0106,227.9912,199.9599  |
| 266 | Phosfolan-Methyl                  | C5H10NO3PS2           | 3.015  | y=0.119197x-0.007888           | 0.9971                                    | 227.9912  | 61.0106,167.9879,109.0049,78.9943,135.9617   |
| 267 | Phosphamidon                      | C10H19ClNO5P          | 4.661  | y=0.224503x-0.010605           | 0.9989                                    | 300.0762  | 127.0155,174.0678,75.9949,72.0444,109.0049   |
| 268 | Phthalic Acid, Benzyl Butyl Ester | C19H20O4              | 16.645 | y=0.024207x+7.586579E-005      | 0.9986                                    | 313.1434  | 149.0233,205.0859,206.0893,239.0703          |
| 269 | Phthalic Acid, Bis-Butyl Ester    | C16H22O4              | 16.869 | y=0.050638x+0.569695           | 0.9271                                    | 279.1591  | 149.0233,205.0859,150.0267,206.0893          |
| 270 | Picolinafen                       | C19H12F4N2O2          | 17.064 | y=0.041410x-0.002612           | 0.9959                                    | 377.0908  | 238.0474,359.0802,145.0260,266.0412,239.0503 |
| 271 | Piperalin                         | C16H21Cl2NO2          | 6.104  | y=0.723167x-0.043231           | 0.9986                                    | 330.1022  | 140.1434,172.9556,112.1121,230.9974,174.9527 |
| 272 | Pirimiphos-methyl-N-desethyl      | C9H16N3O3PS           | 7.514  | y=0.596821x-0.036978           | 0.9980                                    | 278.0723  | 67.0291,108.0556,124.9821,109.0049,78.9943   |
| 273 | Primisulfuron-Methyl              | C15H12F4N4O7S         | 11.96  | y=0.042006x-0.002338           | 0.9989                                    | 469.0436  | 254.0179,204.0211,135.0439,186.0100,199.0053 |
| 274 | Profoxydim                        | C24H32ClNO4S          | 19.036 | y=0.095896x-0.006557           | 0.9944                                    | 466.1813  | 180.1019,280.1366,132.0444,101.0419,194.0634 |
| 275 | Promecarb                         | C12H17NO2             | 9.705  | y=0.041188x+0.004899           | 0.9950                                    | 208.1332  | 91.0542,109.0648,151.1117,94.0413,81.0699    |
| 276 | Prometon                          | C10H19N5O             | 5.352  | y=1.780140x-0.080489           | 0.9993                                    | 226.1662  | 142.0723,86.0349,184.1193,57.0447,100.0505   |
| 277 | Prometryn                         | C10H19N5S             | 8.751  | y=1.135868x-0.067990           | 0.9983                                    | 242.1434  | 68.0243,158.0495,200.0964,85.0509,74.0059    |

| No. | Pesticides           | Elemental composition  | Rt/min | Linear equations          | Correlation coefficient (R <sup>2</sup> ) | Precursor | Product ion                                  |
|-----|----------------------|------------------------|--------|---------------------------|-------------------------------------------|-----------|----------------------------------------------|
| 278 | Propachlor           | C11H14ClNO             | 7.364  | y=0.148294x+0.012351      | 0.9956                                    | 212.0837  | 94.0651,170.0367,77.0386,106.0651,48.9840    |
| 279 | Propaquizafop        | C22H22ClN3O5           | 16.933 | y=0.156116x-0.011029      | 0.9966                                    | 444.1321  | 56.0495,100.0757,70.0651,299.0577,371.0793   |
| 280 | Propazine            | C9H16ClN5              | 8.108  | y=0.422275x-0.022223      | 0.9979                                    | 230.1167  | 146.0228,79.0058,68.0243,188.0697,104.0010   |
| 281 | Propisochlor         | C15H22ClNO2            | 14.315 | y=0.041185x+0.003649      | 0.9943                                    | 284.1412  | 224.0832,133.0886,148.1121,73.0653,212.0832  |
| 282 | Propyzamide          | C12H11Cl2NO            | 11.025 | y=0.015032x-3.366525E-004 | 0.9984                                    | 256.0290  | 189.9821,144.9606172.9556,44.0131,67.0542    |
| 283 | Proquinazid          | C14H17N2O2             | 18.284 | y=0.113272x-0.006746      | 0.9963                                    | 373.0407  | 330.9938,288.9383,271.9203,215.9305,162.0424 |
| 284 | Prosulfocarb         | C14H21NOS              | 16.53  | y=0.119438x-0.005194      | 0.9975                                    | 252.1417  | 91.0542,128.1070,65.0386,86.0600,92.0620     |
| 285 | Prosulfuron          | C15H16F3N5O4S          | 9.546  | y=0.108390x-0.003925      | 0.9993                                    | 420.0948  | 141.0771,167.0564,142.0792,128.0693,168.0586 |
| 286 | Prothioconazole      | C14H15Cl2N3OS          | 12.518 | y=0.006084x-8.519791E-004 | 0.9941                                    | 344.0386  | 102.0120,326.0280,114.0120,328.0251,125.0153 |
| 287 | Prothiofos           | C11H15Cl2O2PS2         | 19.092 | y=0.002080x-4.197536E-004 | 0.9892                                    | 344.9701  | 240.9041,160.9554,132.9604,161.9632,112.9279 |
| 288 | Prothoate            | C9H20NO3PS2            | 7.791  | y=0.272923x-0.014844      | 0.9984                                    | 286.0695  | 96.9508,226.9960,142.9385,124.9821,74.0059   |
| 289 | Pyracarbolid         | C13H15NO2              | 6.001  | y=0.197765x-0.007777      | 0.9977                                    | 218.1176  | 125.0597,55.0178,97.0284,83.0491,77.0386     |
| 290 | Pyraclufos           | C14H18ClN2O3PS         | 14.661 | y=0.260892x-0.009813      | 0.9994                                    | 361.0537  | 138.0103,256.9874,140.0260,96.9508,195.0315  |
| 291 | Pyraflufen           | C13H9Cl2F3N2O4<br>xH2O | 8.324  | y=0.007040x-0.0006109862  | 0.9997                                    | 384.9964  | 338.9909,275.9863,213.0226,253.0175,334.9996 |
| 292 | Pyraflufen-Ethyl     | C15H13Cl2F3N2O<br>4    | 14.994 | y=0.089223x-0.001864      | 0.9996                                    | 413.0277  | 253.0163,338.9904,260.9987,288.9930,254.0241 |
| 293 | Pyrametostrobin      | C21H23N3O4             | 12.501 | y=0.381610x-0.024767      | 0.9980                                    | 382.1761  | 194.0812,163.0628,164.0706,149.0471,162.0550 |
| 294 | Pyraoxystrobin       | C22H21ClN2O4           | 14.907 | y=0.265092x-0.018108      | 0.9979                                    | 413.1263  | 145.0648,205.0859,206.0893,146.0682,173.0597 |
| 295 | Pyrazosulfuron-Ethyl | C14H18N6O7S            | 9.658  | y=0.139834x-0.007890      | 0.9989                                    | 415.1030  | 182.0560,139.0502,83.0240,369.0625,188.0124  |
| 296 | Pyrazoxyfen          | C20H16Cl2N2O3          | 13.893 | y=0.303876x-0.020102      | 0.9967                                    | 403.0611  | 105.0335,139.0502,172.9556,119.0491,174.9527 |
| 297 | Pyribenzoxim         | C32H27N5O8             | 17.791 | y=0.023151x-0.0007011515  | 0.9986                                    | 610.1932  | 180.0808,488.1565,489.1595,456.1316,181.0840 |
| 298 | Pyributicarb         | C18H22N2O2S            | 17.842 | y=0.395120x-0.016000      | 0.9991                                    | 331.1475  | 181.0430,133.1012,108.0444,190.1226,182.0456 |
| 299 | Pyridaphenthion      | C14H17N2O4PS           | 11.606 | y=0.261403x-0.012688      | 0.9987                                    | 341.0719  | 92.0498,189.0659,96.9508,205.0430 65.0389    |
| 300 | Pyrifthalid          | C15H14N2O4S            | 10.528 | y=1.299737x-0.073368      | 0.9990                                    | 319.0747  | 139.0502,179.0161,83.0240,71.0604,93.0083    |
| 301 | Pyrimethanil         | C12H13N3               | 7.576  | y=0.440681x-0.022194      | 0.9980                                    | 200.1182  | 77.0386,82.0651,80.0495,53.0386,168.0682     |
| 302 | Pyrimitate           | C11H20N3O3PS           | 14.726 | y=0.679444x-0.045486      | 0.9959                                    | 306.1036  | 154.0975,96.9508,71.0604,95.0604,136.0869    |
| 303 | Pyriproxyfen         | C20H19NO3              | 17.531 | y=0.328968x-0.023350      | 0.9963                                    | 322.1438  | 96.0444,78.0338,77.0386,129.0699,185.0597    |
| 304 | Pyrisoxazole         | C16H17ClN2O            | 6.625  | y=0.144092x-0.006699      | 0.9980                                    | 289.1102  | 120.0444,151.0866,80.0495,122.0600,135.0917  |
| 305 | Pyriithlobac         | C13H10ClN2O4SN<br>a    | 6.556  | y=0.036419x-8.037478E-004 | 0.9989                                    | 327.0201  | 309.0095,311.0068,310.0124,139.0502,312.0095 |

| No. | Pesticides                   | Elemental composition | Rt/min | Linear equations          | Correlation coefficient (R <sup>2</sup> ) | Precursor | Product ion                                  |
|-----|------------------------------|-----------------------|--------|---------------------------|-------------------------------------------|-----------|----------------------------------------------|
| 306 | Pyroquilon                   | C11H11NO              | 4.856  | y=0.224529x-0.007123      | 0.9985                                    | 174.0913  | 117.0573,132.0808,130.0651,105.0699,90.0464  |
| 307 | Quinoclamine                 | C10H6ClNO2            | 5.092  | y=0.013797x-0.001020      | 0.9938                                    | 208.0160  | 77.0386,89.0386,126.0338,105.0335,172.0393   |
| 308 | Quinoxifen                   | C15H8Cl2FNO           | 16.788 | y=0.158570x-0.011990      | 0.9936                                    | 308.0040  | 196.9789,213.9821,162.0100,95.0292,272.0273  |
| 309 | Quizalofop                   | C17H13ClN2O4          | 9.974  | y=0.016684x-0.001255      | 0.9995                                    | 345.0637  | 164.0131,244.0398,299.0582,163.0053,273.0425 |
| 310 | Quizalofop-Ethyl             | C19H17ClN2O4          | 16.634 | y=0.129231x-0.005155      | 0.9982                                    | 373.0950  | 91.0542,299.0577,255.0315,163.0053,192.0682  |
| 311 | Rabenzazole                  | C12H12N4              | 6.429  | y=0.438711x-0.024404      | 0.9979                                    | 213.1135  | 118.0526,172.0869,157.0634,92.0495,77.0386   |
| 312 | Resmethrin                   | C22H26O3              | 19.023 | y=0.005007x+1.624435E-005 | 0.9904                                    | 339.1955  | 171.0804,128.0621,143.0855,91.0542,105.0335  |
| 313 | Sebuthylazine                | C9H16ClN5             | 7.883  | y=0.244777x-0.011916      | 0.9989                                    | 230.1167  | 174.0541,68.0243,104.0010,79.0058,96.0556    |
| 314 | Sebuthylazine-desethyl       | C7H12ClN5             | 4.455  | y=0.026984x-6.574169E-004 | 0.9951                                    | 202.0854  | 146.0228,68.0243,79.0058,104.0010,61.9792    |
| 315 | Secbumeton                   | C10H19N5O             | 5.29   | y=1.781498x-0.081486      | 0.9993                                    | 226.1662  | 170.1036,68.0243,100.0505,69.0083,57.0447    |
| 316 | Sedaxane                     | C18H19F2N3O           | 11.776 | y=0.542728x-0.047397      | 0.9975                                    | 332.1569  | 159.0364,292.1444,312.1507,160.0392,293.1475 |
| 317 | Siduron                      | C14H20N2O             | 8.545  | y=0.472509x-0.019353      | 0.9993                                    | 233.1648  | 55.0542,137.0709,94.0651,77.0386,97.1012     |
| 318 | Silthiofam                   | C13H21NOSSi           | 13.373 | y=0.166226x-0.008058      | 0.9989                                    | 268.1186  | 73.0468,252.0873,139.0212,75.0261,45.0155    |
| 319 | Simazine                     | C7H12ClN5             | 4.973  | y=0.141217x-0.012435      | 0.9942                                    | 202.0854  | 132.0323,68.0243,124.0869,96.0556,104.0010   |
| 320 | Simeton                      | C8H15N5O              | 3.555  | y=0.214222x-0.009321      | 0.9959                                    | 198.1349  | 68.0243,100.0505,128.0818,71.0604,96.0556    |
| 321 | Simetryn                     | C8H15N5S              | 5.208  | y=0.950583x-0.044510      | 0.9991                                    | 214.1121  | 68.0243,124.0869,96.0556,144.0590,71.0604    |
| 322 | Spirodiclofen                | C21H24Cl2O4           | 18.988 | y=0.013842x-8.760555E-004 | 0.9969                                    | 411.1124  | 71.0855,313.0393,212.9505,184.9556,295.0287  |
| 323 | Spiromesifen                 | C23H30O4              | 18.816 | y=0.397764x-0.024533      | 0.9969                                    | 371.2217  | 67.0542,273.1485,255.1380,131.0855,157.1012  |
| 324 | Spirotetramat                | C21H27NO5             | 10.06  | y=0.447572x-0.023957      | 0.9984                                    | 374.1962  | 302.1751,216.1019,330.2064,270.1489,298.1775 |
| 325 | Spirotetramat-enol-glucoside | C24H33NO8             | 2.702  | y=0.005541x-0.0005473715  | 0.9670                                    | 464.2279  | 216.1019,302.1751,270.1489,303.1783,217.1051 |
| 326 | Spirotetramat-keto-hydroxy   | C18H23NO4             | 5.793  | y=0.037972x-0.001935      | 0.9992                                    | 318.1700  | 268.1332,300.1594,214.0863,100.1121,301.1627 |
| 327 | Spirotetramat-mono-hydroxy   | C18H25NO3             | 4.598  | y=0.189733x-0.007560      | 0.9987                                    | 304.1907  | 119.0855,131.0855,254.1539,81.0699,272.1645  |
| 328 | Spiroxamine                  | C18H35NO2             | 8.167  | y=0.389286x-0.023369      | 0.9962                                    | 298.2741  | 100.1121,144.1383,72.0808,58.0651,84.0808    |
| 329 | Sulfometuron-Methyl          | C15H16N4O5S           | 5.872  | y=0.191637x-0.010703      | 0.9986                                    | 365.0914  | 150.0662,151.0688,199.0060,124.0869,107.0604 |
| 330 | Sulfosulfuron                | C16H18N6O7S2          | 7.156  | y=0.118752x-0.006582      | 0.9989                                    | 471.0751  | 211.0536,218.0223,165.0117,261.0281,156.0768 |
| 331 | Sulfotep                     | C8H20O5P2S2           | 15.76  | y=0.096022x-0.005821      | 0.9963                                    | 323.0300  | 96.9508,171.0239,142.9926,114.9613,124.9821  |
| 332 | Sulprofos                    | C12H19O2PS3           | 18.01  | y=0.017655x-7.782705E-004 | 0.9970                                    | 323.0358  | 218.9698,139.0212,247.0011,154.9715,124.0341 |
| 333 | TCMTB                        | C9H6N2S3              | 10.618 | y=0.008723x-3.905902E-004 | 0.9987                                    | 238.9766  | 179.9936,136.0215,109.0107,180.9962,77.0386  |

| No. | Pesticides         | Elemental composition | Rt/min | Linear equations               | Correlation coefficient (R <sup>2</sup> ) | Precursor | Product ion                                  |
|-----|--------------------|-----------------------|--------|--------------------------------|-------------------------------------------|-----------|----------------------------------------------|
| 334 | Tebufenpyrad       | C18H24CIN3O           | 16.647 | y=0.169665x-0.003523           | 0.9987                                    | 334.1681  | 117.0209,145.0522,132.0934,147.1168,119.0855 |
| 335 | Tebupirimfos       | C13H23N2O3PS          | 17.608 | y=0.132548x-0.008028           | 0.9967                                    | 319.1240  | 153.1022,277.0770,249.0457,231.0352,57.0702  |
| 336 | Tebutam            | C15H23NO              | 12.361 | y=0.586407x-0.028049           | 0.9987                                    | 234.1852  | 91.0542,65.0386,57.0699 192.1383 92.0620     |
| 337 | Tebuthiuron        | C9H16N4OS             | 4.519  | y=0.055666x-0.004476           | 0.9980                                    | 229.1118  | 172.0903,62.0059,116.0277,57.0447,74.0059    |
| 338 | Teflubenzuron      | C14H6C12F4N2O2        | 15.819 | y=5.754620E-004x-8.394251E-004 | 1.0000                                    | 380.9815  | 141.0146,158.0412,113.0197,197.9695,140.0306 |
| 339 | Tembotrione        | C17H16CIF3O6S         | 9.865  | y=0.054648x-0.003057           | 0.9982                                    | 458.0646  | 262.0391,341.0245,305.0478,343.0219,264.0366 |
| 340 | Temephos           | C16H20O6P2S3          | 17.776 | y=0.024780x-4.672633E-004      | 0.9993                                    | 466.9970  | 124.9821,418.9936,404.9780,248.9803,341.0066 |
| 341 | Terbucarb          | C17H27NO2             | 15.765 | y=0.147906x-0.001813           | 0.9980                                    | 278.2115  | 109.0648,166.0863,222.1488,223.1521,167.0894 |
| 342 | Terbufos           | C9H21O2PS3            | 17.142 | y=22.372887x-0.039700          | 0.9939                                    | 289.0514  | 57.0699,103.0576,96.9508,187.0011,199.0011   |
| 343 | Terbufos-Sulfone   | C9H21O4PS3            | 11.609 | y=0.052398x-0.002510           | 0.9979                                    | 321.0412  | 275.0535,124.9821,142.9385,264.9786,153.0134 |
| 344 | Terbufos-Sulfoxide | C9H21O3PS3            | 8.233  | y=0.125798x-0.005303           | 0.9993                                    | 305.0463  | 130.9385,187.0011,158.9698,96.9508,57.0699   |
| 345 | Terbumeton         | C10H19N5O             | 5.598  | y=0.808581x-0.047750           | 0.9986                                    | 226.1662  | 170.1036,69.0083,57.0447,68.0243,100.0505    |
| 346 | Terbutylazine      | C9H16CIN5             | 8.803  | y=0.216914x-0.003510           | 0.9993                                    | 230.1167  | 174.0541,68.0243,104.0010,79.0058,96.0556    |
| 347 | Terbutryn          | C10H19N5S             | 9.143  | y=0.740144x-0.044256           | 0.9983                                    | 242.1434  | 186.0808,68.0243,71.0604,91.0324,96.0556     |
| 348 | Tetraconazole      | C13H11C12F4N3O        | 11.834 | y=0.067988x-0.002623           | 0.9988                                    | 372.0288  | 70.0400,158.9763,160.9734,159.9797,161.9767  |
| 349 | Thenylchlor        | C16H18CINO2S          | 12.973 | y=0.048380x-8.640404E-004      | 0.9989                                    | 324.0820  | 127.0212,128.0242,129.0179,134.0964          |
| 350 | Thiazafluron       | C6H7F3N4OS            | 5.064  | y=0.022227x-0.001060           | 0.9984                                    | 241.0365  | 74.0059,184.0151,111.0165,91.0102,164.0089   |
| 351 | Thiazopyr          | C16H17F5N2O2S         | 15.439 | y=0.348784x-0.027827           | 0.9948                                    | 397.1004  | 377.0941,335.0472,61.0106,275.0261,303.0210  |
| 352 | Thifluzamide       | C13H6Br2F6N2O2S       | 14.168 | y=0.001411x-7.595095E-004      | 0.9947                                    | 526.8494  | 148.0027,168.0089,488.8326,508.8388,486.8369 |
| 353 | Thiobencarb        | C12H16CINOS           | 15.18  | y=0.015128x-0.001005           | 0.9981                                    | 258.0714  | 125.0153,89.0386,100.0757,98.9996,90.0464    |
| 354 | Thiodicarb         | C10H18N4O4S3          | 5.715  | y=0.107117x-0.006019           | 0.9975                                    | 355.0563  | 88.0189,107.9902,62.0025,46.9950,72.9981     |
| 355 | Thiofanox          | C9H18N2O2S            | 6.412  | y=5.136789E-004x+4.493891E-004 | 0.4310                                    | 241.0981  | 57.0699,184.0791,61.0106,98.0185,58.0733     |
| 356 | Thiofanox-Sulfone  | C9H18N2O4S            | 3.854  | y=0.007197x+0.091156           | 0.9859                                    | 251.1060  | 57.0699,76.0393,58.0287,63.9977,104.0165     |
| 357 | Thionazin          | C8H13N2O3PS           | 8.053  | y=0.046400x-0.002341           | 0.9985                                    | 249.0457  | 174.9726,192.9831,124.9821,221.0144,153.0134 |
| 358 | Tiadinil           | C11H10CIN3OS          | 10.108 | y=0.004110x-9.803356E-004      | 0.9955                                    | 268.0306  | 101.0168,251.9993                            |
| 359 | Tiocarbazil        | C16H25NOS             | 18.296 | y=0.193212x-0.010600           | 0.9977                                    | 280.1730  | 91.0542,100.0757,57.0699,224.1104,92.0576    |
| 360 | Tolclofos-Methyl   | C9H11C12O3PS          | 15.665 | y=0.004144x-3.117758E-004      | 0.9847                                    | 300.9616  | 124.9821,110.9994,174.9710,78.9943,268.9354  |
| 361 | Tolfenpyrad        | C21H22CIN3O2          | 16.915 | y=0.129208x-0.008035           | 0.9968                                    | 384.1473  | 197.0961,117.0214,145.0527,198.0995,171.0320 |

| No. | Pesticides             | Elemental composition | Rt/min | Linear equations               | Correlation coefficient (R <sup>2</sup> ) | Precursor | Product ion                                  |
|-----|------------------------|-----------------------|--------|--------------------------------|-------------------------------------------|-----------|----------------------------------------------|
| 362 | triallate              | C10H16Cl3NOS          | 18.089 | y=0.005827x-5.140676E-004      | 0.9966                                    | 304.0091  | 142.9217,86.0600,82.9450,140.9327,128.1070   |
| 363 | Triamiphos             | C12H19N6OP            | 5.468  | y=0.583398x-0.019163           | 0.9997                                    | 295.1431  | 135.0679,92.0260,73.0760,91.0182             |
| 364 | Triapenthenol          | C15H25N3O             | 11.337 | y=0.480950x-0.018785           | 0.9994                                    | 264.2070  | 70.0400,109.1012,55.0542,57.0699,81.0699     |
| 365 | Triasulfuron           | C14H16ClN5O5S         | 6      | y=0.127618x-0.007833           | 0.9974                                    | 402.0633  | 141.0771,167.0537,56.0495,137.0042,91.0542   |
| 366 | Tribufos               | C12H27OPS3            | 18.88  | y=0.348288x-0.020001           | 0.9982                                    | 315.1034  | 168.9905,57.0699,112.9279,170.9866,259.0408  |
| 367 | Triclopyricarb         | C15H13Cl3N2O4         | 16.648 | y=6.427994E-004x-2.520985E-004 | 0.9339                                    | 391.0014  | 163.0628,194.0812,164.0706,149.0471,162.0550 |
| 368 | Trietazine             | C9H16ClN5             | 11.351 | y=0.518566x-0.022880           | 0.9982                                    | 230.1167  | 71.0604,68.0243,104.0010,99.0917,202.0854    |
| 369 | Trifloxystrobin        | C20H19F3N2O4          | 16.698 | y=0.288157x-0.019888           | 0.9977                                    | 409.1370  | 145.0260,186.0525,116.0495,206.0812,131.0730 |
| 370 | Triflumizole           | C15H15ClF3N3O         | 14.986 | y=0.200985x-0.013114           | 0.9977                                    | 346.0929  | 69.0447,73.0648,278.0554,280.0527,205.9979   |
| 371 | Trifluralin            | C13H16F3N3O4          | 17.978 | y=5.881016E-005x-2.407119E-005 | 0.7375                                    | 336.1166  | 202.0349,248.0278,252.0227,302.1111,236.0278 |
| 372 | Triflusulfuron-Methyl  | C17H19F3N6O6S         | 11.909 | y=0.278738x-0.017356           | 0.9987                                    | 493.1112  | 264.0698,96.0556,265.0720,461.0850,238.0901  |
| 373 | Tri-Isobutyl Phosphate | C12H27O4P             | 14.48  | y=0.136099x-0.008029           | 0.9952                                    | 267.1720  | 98.9842,155.0468,211.1094,57.0699,80.9736    |
| 374 | Trinexapac-Ethyl       | C13H16O5              | 7.508  | y=0.031602x+2.247316E-004      | 0.9976                                    | 253.1071  | 69.0335,207.0652,185.0808,165.0182,139.0390  |
| 375 | Triticonazole          | C17H20ClN3O           | 9.293  | y=0.106410x-0.005022           | 0.9977                                    | 318.1368  | 70.0400,125.0153,59.0496,71.0478,191.0622    |
| 376 | Tritosulfuron          | C13H9F6N5O4S          | 9.389  | y=0.010185x-6.421644E-004      | 0.9952                                    | 446.0352  | 145.0258,195.0479,110.0212,221.0270,127.0478 |
| 377 | Uniconazole            | C15H18ClN3O           | 10.568 | y=0.127361x-6.437661E-005      | 0.9997                                    | 292.1211  | 70.0400,125.0153,57.0699,71.0413,69.0699     |
| 378 | Vernolate              | C10H21NOS             | 15.321 | y=0.007981x+9.947211E-004      | 0.9989                                    | 204.1417  | 86.0600,128.1070,100.0757,88.1121,84.0808    |
| 379 | Zoxamide               | C14H16Cl3NO2          | 14.934 | y=0.087853x-0.002351           | 0.9998                                    | 336.0319  | 186.9712,158.9763,203.9973,122.9996,132.0574 |

**Supplemental Table 2** The retention time, linear equations, correlation coefficient and product ion for 327 pesticides determined by GC-Q-TOFMS

| No. | Pesticides                                   | Elemental composition | Rt/min | Linear equations            | Correlation coefficient (R <sup>2</sup> ) | Precursor | Product ion                                  |
|-----|----------------------------------------------|-----------------------|--------|-----------------------------|-------------------------------------------|-----------|----------------------------------------------|
| 1   | 1,4-Dimethylnaphthalene                      | C12H12                | 9.095  | $y=6.367566x+0.048192$      | 0.9982                                    | 141.0699  | 156.0934,115.0542,155.0855,153.0699,152.0621 |
| 2   | 2,3,4,5-Tetrachloroaniline                   | C6H3Cl4N              | 14.987 | $y=3.064808x-0.008777$      | 0.9982                                    | 230.8985  | 228.9014,232.8956,157.9559,168.9187,166.9217 |
| 3   | 2,4'-DDT                                     | C14H9Cl5              | 24.006 | $y=2.269468x-3.381249E-004$ | 0.9983                                    | 235.0076  | 237.0048,165.0699,245.9998,176.0621,247.9970 |
| 4   | 2,4-D-ethylhexyl                             | C16H22Cl2O3           | 22.749 | $y=2.055010x-0.007474$      | 0.9981                                    | 219.9689  | 221.9660,161.9634,163.9605,332.0941,185.0000 |
| 5   | 2,4'-Dicofol                                 | C14H9Cl5O             | 17.962 | $y=4.941586x+0.001051$      | 0.9974                                    | 138.9945  | 110.9996,140.9893,249.9947,75.0229,251.9933  |
| 6   | 4,4'-DDD                                     | C14H10Cl4             | 23.902 | $y=3.207233x+0.002176$      | 0.9997                                    | 235.0076  | 237.0048,165.0699,212.0387,199.0309,236.0110 |
| 7   | 4,4'-DDE                                     | C14H8Cl4              | 22.41  | $y=4.203621x+0.044326$      | 0.9928                                    | 245.9998  | 247.9970,317.9346,315.9375,176.0621,319.9318 |
| 8   | 4-Bromo-3,5-Dimethylphenyl-N-Methylcarbamate | C10H12BrNO2           | 9.523  | $y=2.091885x+0.001732$      | 0.9956                                    | 199.9831  | 201.9824,121.0648,91.0542,77.0386,200.9857   |
| 9   | 4'-Chloro-2,2,2-trifluoroacetophenone        | C8H4ClF3O             | 4.594  | $y=0.795438x-0.003469$      | 0.9961                                    | 138.9945  | 110.9996,140.9911,75.0229,112.9959,74.0151   |
| 10  | Acibenzolar-S-methyl                         | C8H6N2OS2             | 17.309 | $y=0.695378x+0.010159$      | 0.9973                                    | 181.9855  | 180.9776,134.9899,106.9950,63.0229,152.9827  |
| 11  | Akton                                        | C12H14Cl3O3PS         | 21.442 | $y=2.970024x+0.018400$      | 0.9968                                    | 282.9147  | 96.9508,284.9118,172.9556,338.9773,169.9685  |
| 12  | Aldicarb-sulfone                             | C7H14N2O4S            | 5.354  | $y=0.386407x+4.634212E-004$ | 0.9977                                    | 64.9693   | 68.0495,79.9927,69.0524,78.9848,62.9899      |
| 13  | Aldrin                                       | C12H8Cl6              | 18.636 | $y=1.424664x-0.001631$      | 0.9971                                    | 262.8564  | 66.0464,264.8535,260.8594,91.0542,65.0386    |
| 14  | alpha-Endosulfan                             | C9H6Cl6O3S            | 21.427 | $y=0.514179x+0.003223$      | 0.9962                                    | 236.8408  | 240.9043,169.9685,242.9014,206.9344,205.9266 |
| 15  | alpha-HCH                                    | C6H6Cl6               | 13.585 | $y=2.361040x-0.013213$      | 0.9954                                    | 180.9373  | 182.9344,218.9111,108.9606,112.0074,216.9140 |
| 16  | Amidosulfuron                                | C9H15N5O7S2           | 7.372  | $y=1.045191x-0.040479$      | 0.9954                                    | 154.0611  | 155.0689,126.0662,68.0131,109.0396,140.0455  |
| 17  | Anthraquinone                                | C14H8O2               | 18.608 | $y=1.423970x-0.012122$      | 0.8465                                    | 208.0519  | 152.0621,180.0570,151.0542,76.0308,150.0464  |
| 18  | Aspon                                        | C12H28O5P2S2          | 18.995 | $y=5.742287x+0.031351$      | 0.9988                                    | 210.9048  | 209.8970,252.9518,114.9613,192.8943,251.9439 |
| 19  | Benazolin-ethyl                              | C9H6ClNO3S            | 20.222 | $y=3.922936x+0.005888$      | 0.9999                                    | 169.9826  | 197.9775,134.0059,171.9796,271.0064,199.9745 |
| 20  | Benzovindiflupyr                             | C18H15Cl2F2N3O        | 32.505 | $y=1.139925x-0.078377$      | 0.2780                                    | 159.0364  | 236.9743,238.9715,362.0866,369.0242,260.0585 |
| 21  | Benzoximate                                  | C18H18ClNO5           | 11.19  | $y=0.333669x+0.012732$      | 0.9929                                    | 213.0187  | 170.0003,197.9953,215.0153,154.9769,171.9972 |
| 22  | beta-Endosulfan                              | C9H6Cl6O3S            | 23.478 | $y=0.336002x+0.003815$      | 0.9971                                    | 236.8408  | 63.9613,240.9043,242.9014,159.9841,206.9433  |
| 23  | beta-HCH                                     | C6H6Cl6               | 14.565 | $y=2.067124x-0.017151$      | 0.9949                                    | 180.9373  | 182.9344,218.9111,108.9606,112.0074,216.9140 |
| 24  | Bixafen                                      | C18H12Cl2F3N3O        | 32.079 | $y=19.075757x+0.773999$     | 0.9824                                    | 159.0364  | 413.0304,160.0394,415.0276,139.0302,184.0557 |
| 25  | Bromfenvinfos-Methyl                         | C10H10BrCl2O4P        | 20.531 | $y=0.399193x-5.446563E-004$ | 0.9942                                    | 109.0049  | 294.9688,172.9556,296.9661,169.9685,174.9526 |
| 26  | Bromphos-Methyl                              | C8H8BrCl2O3PS         | 19.637 | $y=1.113102x+0.004725$      | 0.9978                                    | 330.8775  | 328.8798,124.9821,332.8749,78.994,393.0100   |

| No. | Pesticides           | Elemental composition | Rt/min | Linear equations          | Correlation coefficient (R <sup>2</sup> ) | Precursor | Product ion                                  |
|-----|----------------------|-----------------------|--------|---------------------------|-------------------------------------------|-----------|----------------------------------------------|
| 27  | Butamifos            | C13H21N2O4PS          | 22.01  | y=1.681211x+0.001688      | 0.9979                                    | 95.9668   | 286.1025,200.0107,202.0083,231.9828,153.0420 |
| 28  | Butylate             | C11H23NOS             | 8.821  | y=2.627883x+0.004503      | 0.9998                                    | 146.0998  | 156.1383,57.0699,174.0947,75.0263,89.0056    |
| 29  | Cadusafos            | C10H23O2PS2           | 13.353 | y=4.078223x-0.011557      | 0.9964                                    | 158.9698  | 56.0620,96.9508,55.0542,157.9620,89.0419     |
| 30  | Carbofuran           | C12H15NO3             | 14.406 | y=7.661463x+0.252546      | 0.9845                                    | 164.0832  | 149.0597,131.0491,121.0648,103.0542,123.0441 |
| 31  | Carbofuran-3-Hydroxy | C12H15NO4             | 17.262 | y=0.034441x+0.014016      | 0.9806                                    | 137.0233  | 147.0441,180.0781,57.0209,162.0675,137.0597  |
| 32  | Carfentrazone-ethyl  | C15H14C12F3N3O3       | 25.07  | y=0.748563x+0.011396      | 0.9944                                    | 312.0591  | 330.0252,340.0904,310.0190,290.0302,134.0401 |
| 33  | Chlorbenzuron        | C14H10Cl2N2O2         | 9.159  | y=1.095649x+0.007143      | 0.9933                                    | 138.9945  | 140.9911,110.9996,75.0229,155.0132,112.9961  |
| 34  | Chlorbufam           | C11H10ClNO2           | 14.441 | y=0.0006x+0.0115          | 0.9576                                    | 152.9976  | 125.0027,154.9952,90.0338,127.0183,63.0229   |
| 35  | Chlordimeform        | C10H13ClN2            | 12.774 | y=4.393947x+109.238095    | 0.0104                                    | 181.0527  | 117.0573,196.0762,152.0262,89.0386,154.0418  |
| 36  | Chlorethoxyfos       | C6H11Cl4O3PS          | 12.156 | y=3.325654x-0.016895      | 0.9957                                    | 96.9508   | 153.0134,124.9821,262.9460,264.9431,165.8719 |
| 37  | Chlorfenethol        | C14H12Cl2O            | 20.29  | y=3.710892x-0.017387      | 0.9937                                    | 138.9945  | 251.0025,178.0777,252.9997,248.0154,140.9917 |
| 38  | Chlormephos          | C5H12ClO2PS2          | 8.996  | y=3.043549x-0.012054      | 0.9981                                    | 96.9508   | 121.0413,64.9787,93.0100,154.0212,124.9821   |
| 39  | Chlorpropham         | C10H12ClNO2           | 12.65  | y=1.228873x+3.865749E-004 | 0.9971                                    | 171.0082  | 152.9976,127.0183,129.0148,213.0551,154.0418 |
| 40  | Chlorsulfuron        | C12H12ClN5O4S         | 6.942  | y=-0.206392x+0.336683     | 1.0000                                    | 110.0587  | 140.0693,69.0322,139.0614,111.0647,68.0257   |
| 41  | Chlorthion           | C8H9ClNO5PS           | 19.389 | y=0.210973x+0.005988      | 0.9935                                    | 124.9821  | 109.0049,296.9622,266.9642,78.9943,298.9594  |
| 42  | Chlorthiophos        | C11H15Cl2O3PS2        | 24.28  | y=1.429695x+0.003733      | 0.9988                                    | 268.9257  | 96.9508,324.9883,270.9227,296.9570,207.9511  |
| 43  | Cinidon-Ethyl        | C19H17Cl2NO4          | 34.95  | y=4.310876x+0.257626      | 0.8045                                    | 330.0528  | 332.0504,358.0841,331.0560,79.0542,77.0386   |
| 44  | cis-Diallate         | C10H17Cl2NOS          | 13.467 | y=1.805471x-0.017766      | 0.9958                                    | 234.0714  | 236.0704,86.0600,108.9606,110.9577,235.0762  |
| 45  | Clodinafop-propargyl | C17H13ClFNO4          | 25.405 | y=0.783445x+0.008463      | 0.9944                                    | 238.0066  | 266.0379,349.0512,91.0542,239.0144,129.9854  |
| 46  | Coumaphos            | C14H16ClO5PS          | 30.492 | y=0.737478x-1.900838E-004 | 0.9996                                    | 96.9508   | 225.9850,109.0049,362.0139,210.0078,64.9787  |
| 47  | Crimidine            | C7H10ClN3             | 10.286 | y=3.187393x-0.072504      | 0.9921                                    | 142.0292  | 156.0323,171.0558,144.0263,120.0556,93.0447  |
| 48  | Crufomate            | C12H19ClNO3P          | 19.466 | y=0.474105x+0.001515      | 0.9929                                    | 169.0415  | 182.0731,256.1097,141.0102,108.0209,184.0689 |
| 49  | Cyenopyrafen         | C24H31N3O2            | 27.916 | y=0.753586x+0.008162      | 0.9984                                    | 309.1836  | 294.1601,310.1866,57.0699,295.1631,184.0757  |
| 50  | Cyhalofop-Butyl      | C20H20FNO4            | 28.726 | y=0.827146x+0.004506      | 0.9906                                    | 256.0768  | 229.0534,120.0570,357.1371,228.0455,158.0401 |
| 51  | Cymiazole            | C12H14N2S             | 17.37  | y=3.469760x-0.001532      | 0.9939                                    | 218.0872  | 144.0808,119.0855,185.1073,130.0651,177.0607 |
| 52  | DDT                  | C14H9Cl5              | 25.22  | y=1.108576x-0.001695      | 0.9967                                    | 235.0076  | 237.0048,165.0699,245.9998,212.0387,176.0621 |
| 53  | delta-HCH            | C6H6Cl6               | 15.673 | y=0.382650x+0.002177      | 0.9926                                    | 180.9373  | 182.9344,218.9111,112.0074,216.9140,145.9685 |
| 54  | Demeton-O            | C8H19O3PS2            | 11.989 | y=0.890399x+0.002440      | 0.9970                                    | 114.9613  | 60.0028,88.0341,89.0419,61.0106,96.9508      |



| No. | Pesticides                 | Elemental composition | Rt/min | Linear equations      | Correlation coefficient (R <sup>2</sup> ) | Precursor | Product ion                                  |
|-----|----------------------------|-----------------------|--------|-----------------------|-------------------------------------------|-----------|----------------------------------------------|
| 55  | Demeton-S                  | C8H19O3PS2            | 14.083 | y=5.186557x-0.034918  | 0.9976                                    | 60.0028   | 88.0341,58.9950,113.9535,114.9613,75.0263    |
| 56  | Desethylterbuthylazine     | C7H12CIN5             | 13.185 | y=4.419154x-0.034518  | 0.9986                                    | 186.0541  | 188.0513,145.0150,83.0604,104.0010,110.0461  |
| 57  | Desmetryn                  | C8H15N5S              | 16.743 | y=3.291256x-0.025722  | 0.9949                                    | 213.1043  | 198.0808,171.0573,82.0463,58.0651,57.0447    |
| 58  | Dicofol                    | C14H9Cl5O             | 26.971 | y=19.043272x+0.047104 | 0.9982                                    | 138.9945  | 140.9916,110.9996,75.0229,249.9946,82.9449   |
| 59  | Dieldrin                   | C12H8Cl6O             | 22.367 | y=0.676931x+0.001993  | 0.9975                                    | 79.0542   | 262.8564,81.0335,264.8535,260.8594,77.0386   |
| 60  | Diethyl-Ethyl              | C16H22ClNO3           | 22.016 | y=2.673389x-0.009821  | 0.9990                                    | 188.1070  | 160.1121,162.1277,132.0808,262.1438,146.0964 |
| 61  | Difenoconazole             | C19H17Cl2N3O3         | 33.127 | y=6.195746x+0.041444  | 0.9889                                    | 264.9818  | 323.0236,266.9795,325.0211,202.0180,265.9850 |
| 62  | Difenoconazole             | C16H18N2O3            | 18.807 | y=9.741958x-0.058077  | 0.9899                                    | 241.0733  | 226.0499,198.0550,90.0338,170.0600,242.0758  |
| 63  | Diflufenican               | C19H11F5N2O2          | 26.041 | y=3.696959x-0.021014  | 0.9954                                    | 266.0423  | 246.0361,267.0461,394.0735,218.0412,238.0474 |
| 64  | Dimepiperate               | C15H21NOS             | 20.597 | y=7.104542x+0.072419  | 0.9930                                    | 119.0855  | 118.0777,91.0542,117.0699,145.0556,146.0634  |
| 65  | Dimethachlon               | C10H7Cl2NO2           | 19.534 | y=0.811852x+0.010554  | 0.9983                                    | 242.9848  | 186.9950,188.9921,55.0178,123.9949,152.0262  |
| 66  | Dimethachlor               | C13H18ClNO2           | 16.898 | y=5.861492x+0.051953  | 0.9993                                    | 134.0964  | 197.0602,132.0808,148.0757,117.0573,135.0993 |
| 67  | Dimethametryn              | C11H21N5S             | 20.25  | y=10.466594x+0.017111 | 0.9985                                    | 212.0964  | 213.0994,122.0713,68.0243,153.0104,199.0073  |
| 68  | Dimethenamid               | C12H18ClNO2S          | 16.935 | y=7.096479x+0.001507  | 0.9957                                    | 154.0685  | 230.0401,203.0166,232.0380,138.0372,155.0720 |
| 69  | Dimethomorph               | C21H22ClNO4           | 33.947 | y=0.017097x+0.099443  | 0.0004                                    | 301.0626  | 303.0571,387.1232,165.0573,302.0685,260.0468 |
| 70  | Dimethylvinphos (E)        | C10H10Cl3O4P          | 18.499 | y=0.564687x+0.012280  | 0.9957                                    | 294.9688  | 296.9661,109.0049,172.9556,298.9636,295.9722 |
| 71  | Dimetilan                  | C10H16N4O3            | 17.579 | y=10.451594x-0.047624 | 0.9943                                    | 72.0444   | 170.0924,73.0479,225.0982,152.0818,56.0131   |
| 72  | Dinitramine                | C11H13F3N4O4          | 15.85  | y=0.884856x-0.004384  | 0.9938                                    | 305.0856  | 261.0594,307.0649,244.0580,216.0352,141.0270 |
| 73  | Dioxabenzofos              | C8H9O3PS              | 13.01  | y=1.592262x+0.006434  | 0.9982                                    | 216.0005  | 153.0100,78.0464,183.0206,200.9770,137.0056  |
| 74  | Dioxacarb                  | C11H13NO4             | 8.654  | y=1.169523x+0.059031  | 0.9983                                    | 121.0284  | 57.0209,165.0546,122.0362,56.0131,166.0624   |
| 75  | Dioxathion                 | C12H26O6P2S4          | 30.677 | y=0.079137x+0.003908  | 0.9399                                    | 96.9508   | 124.9821,271.0222,64.9787,128.9228,86.0362   |
| 76  | Diphenamid                 | C16H17NO              | 19.701 | y=7.623997x+0.060238  | 0.9965                                    | 167.0855  | 72.0444,165.0699,152.0621,166.0777,168.0891  |
| 77  | Dipropetryn                | C11H21N5S             | 18.663 | y=0.728592x-0.005581  | 0.9864                                    | 255.1512  | 184.0651,240.1277,222.1713,68.0243,58.0651   |
| 78  | Dipropyl Isocinchomeronate | C13H17NO4             | 17.237 | y=4.670976x+0.088309  | 0.9955                                    | 165.0784  | 123.0315,164.0706,179.0941,192.0655,77.0260  |
| 79  | Dithiopyr                  | C15H16F5NO2S2         | 18.22  | y=3.141114x+0.009978  | 0.9979                                    | 286.0486  | 306.0548,354.0582,237.0208,258.0536,287.0529 |
| 80  | Dodemorph                  | C18H35NO              | 19.535 | y=8.370335x+0.056582  | 0.9983                                    | 154.1226  | 238.2165,155.1251,281.2713,128.1070,126.0913 |
| 81  | Endosulfan-sulfate         | C9H6Cl6O4S            | 25.027 | y=0.104006x+0.001769  | 0.9920                                    | 271.8096  | 273.8067,236.8408,228.8954,269.8126,226.8983 |
| 82  | Enestroburin               | C22H22ClNO4           | 34.071 | y=9.741958x-0.058077  | 0.9899                                    | 145.0648  | 178.0418,130.0413,131.0491,161.0597,102.0464 |

| No. | Pesticides           | Elemental composition | Rt/min | Linear equations          | Correlation coefficient (R <sup>2</sup> ) | Precursor | Product ion                                  |
|-----|----------------------|-----------------------|--------|---------------------------|-------------------------------------------|-----------|----------------------------------------------|
| 83  | EPN                  | C14H14NO4PS           | 27.101 | y=0.901054x+0.002947      | 0.9978                                    | 156.9872  | 141.0100,169.0413,62.9453,185.0184,77.0386   |
| 84  | Epoxiconazole        | C17H13ClFN3O          | 26.342 | y=1.190390x-0.001735      | 0.9980                                    | 192.0336  | 165.0214,194.0306,138.0105,157.0634,183.0605 |
| 85  | EPTC                 | C9H19NOS              | 7.775  | y=2.472994x+8.815286E-004 | 0.9994                                    | 128.1070  | 86.0600,132.0842,129.1100,75.0263,70.0651    |
| 86  | Esprocarb            | C15H23NOS             | 18.38  | y=3.649050x+8.424918E-004 | 0.9994                                    | 91.0542   | 222.0947,71.0855,162.1277,92.0580,65.0386    |
| 87  | Etaconazole          | C14H15Cl2N3O2         | 23.819 | y=0.885975x+0.001640      | 0.9981                                    | 172.9556  | 245.0131,55.0542,174.9527,190.9648,247.0103  |
| 88  | Ethiolate            | C7H15NOS              | 5.966  | y=2.114762x+0.017863      | 0.9980                                    | 100.0757  | 72.0444,101.0789,56.0495,161.0869,118.0685   |
| 89  | Ethofumesate         | C13H18O5S             | 18.399 | y=3.816864x+0.100316      | 0.9985                                    | 161.0597  | 207.1016,137.0597,133.0648,179.0703,105.0699 |
| 90  | Ethoprophos          | C8H19O2PS2            | 12.358 | y=3.622029x-0.010118      | 0.9979                                    | 96.9508   | 157.9620,126.9977,138.9977,93.0100,64.9787   |
| 91  | Ethoxyquin           | C14H19NO              | 14.241 | y=10.113736x-0.011272     | 0.9965                                    | 202.1226  | 174.0913,203.1305,145.0886,173.0835,217.1461 |
| 92  | ethychlozate         | C11H11ClN2O2          | 20.296 | y=-1.732562x+1.226529     | 1.0000                                    | 165.0214  | 167.0184,238.0504,166.0292,138.0105,75.0229  |
| 93  | Etofenprox           | C25H28O3              | 31.869 | y=2.970617x+0.030148      | 0.9952                                    | 163.1117  | 135.0804,107.0491,133.0648,176.1196,77.0386  |
| 94  | Etoxazole            | C21H23F2NO2           | 27.547 | y=1.265383x-0.011334      | 0.9937                                    | 141.0146  | 187.1117,204.1383,300.1194,139.0228,176.1081 |
| 95  | Eugenol              | C10H12O2              | 7.782  | y=0.872384x+2.549079      | 0.2906                                    | 164.0832  | 103.0542,149.0597,131.0491,77.0386,91.0542   |
| 96  | Famphur              | C10H16NO5PS2          | 24.826 | y=6.630637x+0.016844      | 0.9922                                    | 218.0161  | 93.0100,124.9821,217.0083,109.0049,78.9943   |
| 97  | Fenamidone           | C17H17N3OS            | 27.559 | y=1.243430x-0.013660      | 0.9920                                    | 238.1101  | 268.0903,77.0386,237.1022,103.0542,91.0416   |
| 98  | Fenamiphos           | C13H22NO3PS           | 21.985 | y=0.775921x+0.013383      | 0.9964                                    | 154.0447  | 303.1053,217.0083,260.0505,139.0212,79.9896  |
| 99  | Fenamiphos-sulfone   | C13H22NO5PS           | 26.836 | y=1.970065x-0.013118      | 0.9895                                    | 292.0403  | 320.0716,79.9896,214.0628,107.0491,77.0386   |
| 100 | Fenamiphos-sulfoxide | C13H22NO4PS           | 26.674 | y=0.686982x-0.050290      | 0.9637                                    | 304.0767  | 303.1053,196.0791,122.0362,154.0447,260.0505 |
| 101 | Fenazaquin           | C20H22N2O             | 27.61  | y=6.067166x-0.054826      | 0.9972                                    | 145.1012  | 117.0699,160.1246,146.1051,91.0542,115.0542  |
| 102 | Fenchlorphos         | C8H8Cl3O3PS           | 17.743 | y=2.008262x+0.004358      | 0.9991                                    | 284.9303  | 286.9275,124.9821,78.9943,93.0100,109.0049   |
| 103 | Fenchlorphos-Oxon    | C8H8Cl3O4P            | 16.594 | y=0.378720x-0.001438      | 0.9909                                    | 268.9532  | 270.9504,109.0049,78.9943,195.9244,253.9297  |
| 104 | Fenfuram             | C12H11NO2             | 15.705 | y=6.903033x+0.073653      | 0.9947                                    | 109.0284  | 201.0784,110.0317,184.0519,202.0816,65.0386  |
| 105 | Fenoprop             | C10H9Cl3O3            | 14.672 | y=0.069929x+6.559388E-004 | 0.9957                                    | 197.9210  | 195.9244,199.9180,222.9479,224.9441,207.0305 |
| 106 | Fenothiocarb         | C13H19NO2S            | 21.369 | y=5.814580x+0.008724      | 0.9973                                    | 72.0444   | 94.0413,88.0341,160.0791,60.0028,77.0386     |
| 107 | Fenoxaprop-Ethyl     | C18H16ClNO5           | 29.759 | y=0.396940x+0.022419      | 0.9816                                    | 288.0422  | 361.0712,290.0397,261.0187,119.0491,182.0600 |
| 108 | Fenoxasulfone        | C14H17Cl2NO4S         | 28.467 | y=0.831553x+0.013851      | 0.9905                                    | 174.9722  | 176.9823,203.0014,260.0603,178.9731,205.0098 |
| 109 | Fenoxycarb           | C17H19NO4             | 27.101 | y=6.853316x-0.066909      | 0.9967                                    | 186.0675  | 255.0890,77.0386,88.0393,129.0699,185.0597   |
| 110 | Fenpropidin          | C19H31N               | 17.952 | y=31.703955x-0.450391     | 0.9950                                    | 98.0964   | 96.0808,99.0996,70.0651,117.0699,91.0542     |
| 111 | Fenpropimorph        | C20H33NO              | 19.038 | y=23.504342x-0.266829     | 0.9936                                    | 128.1070  | 129.1101,126.0913,70.0651,110.0964,128.1434  |

| No. | Pesticides                 | Elemental composition | Rt/min | Linear equations          | Correlation coefficient (R <sup>2</sup> ) | Precursor | Product ion                                  |
|-----|----------------------------|-----------------------|--------|---------------------------|-------------------------------------------|-----------|----------------------------------------------|
| 112 | Fenpyrazamine              | C17H21N3O2S           | 29.38  | y=0.610316x-0.046429      | 0.8150                                    | 230.1301  | 130.0651,132.0808,256.1444,115.0542,117.0573 |
| 113 | Fensulfothion              | C11H17O4PS2           | 23.748 | y=0.089858x-0.002438      | 0.6602                                    | 292.0351  | 156.0062,293.0066,264.0038,96.9508,140.0290  |
| 114 | Fensulfothion-Oxon-Sulfone | C11H17O6PS            | 23.16  | y=0.249988x-0.010720      | 0.9975                                    | 109.0284  | 98.9842,201.0311,119.0491,103.0542,90.9943   |
| 115 | Fensulfothion-sulfone      | C11H17O5PS2           | 24.364 | y=0.391274x-0.009688      | 0.3949                                    | 96.9508   | 187.9960,109.0049,109.0235,324.0250,156.9954 |
| 116 | fentin hydroxide           | C18H16OSn             | 31.006 | y=0.038130x+4.153730E-004 | 0.9828                                    | 351.0190  | 349.0184,196.9412,347.0166,350.0207,194.9405 |
| 117 | Ferimzone                  | C15H18N4              | 21.036 | y=0.508610x+0.059140      | 0.9464                                    | 239.1291  | 132.0808,123.0791,137.0947,130.0651,96.0682  |
| 118 | Fipronil                   | C12H4Cl2F6N4OS        | 20.684 | y=1.983045x-0.005620      | 0.9966                                    | 366.9430  | 368.9400,212.9480,350.9480,254.9698,352.9451 |
| 119 | Fipronil Desulfinyl        | C12H4Cl2F6N4          | 17.734 | y=2.146960x-0.001878      | 0.9979                                    | 332.9961  | 387.9712,389.9684,334.9934,280.9899,333.9988 |
| 120 | Fipronil-sulfide           | C12H4Cl2F6N4S         | 20.427 | y=2.401534x-0.012922      | 0.9963                                    | 350.9480  | 352.9451,254.9698,419.9432,256.9669,421.9403 |
| 121 | Fipronil-sulfone           | C12H4Cl2F6N4O2S       | 22.95  | y=0.645462x+0.012084      | 0.9978                                    | 382.9379  | 384.9349,254.9698,212.9480,240.9566,256.9669 |
| 122 | Flamprop-isopropyl         | C19H19ClFNO3          | 23.965 | y=15.482574x-0.131559     | 0.9945                                    | 105.0335  | 77.0386,276.0586,106.0369,156.0011,128.9902  |
| 123 | Flamprop-methyl            | C17H15ClFNO3          | 22.798 | y=11.886395x-0.073299     | 0.9948                                    | 105.0335  | 77.0386,230.0379,106.0371,276.0586,156.0011  |
| 124 | Flonicamid                 | C9H6F3N3O             | 11.815 | y=3.016780x-0.036492      | 0.9864                                    | 174.0161  | 146.0212,172.0243,126.0150,147.0280,68.9947  |
| 125 | Fluacrypyrim               | C20H21F3N2O5          | 24.812 | y=3.329614x+0.150506      | 0.9962                                    | 145.0648  | 189.0546,204.0781,115.0542,103.0542,320.0428 |
| 126 | Fluazifop                  | C15H12F3NO4           | 19.548 | y=0.167256x+0.004480      | 0.9932                                    | 282.0736  | 254.0412,146.0212,227.0553,255.0444,126.0150 |
| 127 | Fluazifop-butyl            | C19H20F3NO4           | 23.462 | y=3.939156x+0.040063      | 0.9980                                    | 282.0736  | 254.0423,383.1339,255.0502,268.0580,91.0542  |
| 128 | Fluazuron                  | C20H10Cl2F5N3O3       | 19.509 | y=0.116927x-0.003808      | 0.9915                                    | 287.0193  | 289.0160,288.0218,269.9928,271.9901,290.0183 |
| 129 | Flubenzimine               | C17H10F6N4S           | 22.575 | y=0.076950x-0.001192      | 0.9984                                    | 135.0137  | 186.0399,77.0386,416.0525,212.0430,91.0416   |
| 130 | Fluensulfone               | C7H5ClNS2O2F3         | 11.651 | y=2.217103x-0.005935      | 0.9990                                    | 118.9591  | 91.9482,225.9700,187.9732,120.9551,108.0181  |
| 131 | Flufenacet                 | C14H13F4N3O2S         | 19.277 | y=0.323218x+0.006523      | 0.9986                                    | 210.9784  | 151.0792,123.0439,136.0557,122.0412,68.9947  |
| 132 | Flufenoxuron               | C21H11ClF6N2O3        | 16.183 | y=0.583017x+0.008754      | 0.9929                                    | 305.0225  | 126.0350,307.0206,306.0265,270.0536,98.0401  |
| 133 | Flufiprole                 | C16H10Cl2F6N4OS       | 21.678 | y=1.110673x-0.004827      | 0.9959                                    | 402.9834  | 404.9818,420.9899,212.9491,371.0090,422.9892 |
| 134 | Flumetralin                | C16H12ClF4N3O4        | 21.769 | y=2.047968x-2.679598E-005 | 0.9984                                    | 143.0058  | 145.0037,156.9885,107.0292,404.0420,144.0103 |
| 135 | Flumioxazin                | C19H15FN2O4           | 32.668 | y=3.794768x+0.033231      | 0.9961                                    | 354.1010  | 326.1061,287.0826,355.1042,259.0514,312.0905 |
| 136 | Fluopyram                  | C16H11ClF6N2O         | 20.647 | y=5.036580x+0.012046      | 0.9971                                    | 173.0209  | 145.0260,223.0244,195.0069,207.0069,208.0135 |
| 137 | Fluoroglycofen-ethyl       | C18H13ClF3NO7         | 29.541 | y=0.003079x-0.001295      | 0.9515                                    | 343.9932  | 207.0441,345.0010,222.9768,75.0229,223.0354  |
| 138 | Fluotrimazole              | C22H16F3N3            | 26.339 | y=2.191302x+0.055832      | 0.9927                                    | 165.0697  | 311.1042,312.1120,233.0573,241.1010,166.0775 |

| No. | Pesticides              | Elemental composition       | Rt/min | Linear equations            | Correlation coefficient (R <sup>2</sup> ) | Precursor | Product ion                                  |
|-----|-------------------------|-----------------------------|--------|-----------------------------|-------------------------------------------|-----------|----------------------------------------------|
| 139 | Fluquinconazole         | C16H8Cl2FN5O                | 30.465 | y=0.961502x-0.023259        | 0.4731                                    | 340.0396  | 342.0367,108.0244,341.0419,298.0178,313.0287 |
| 140 | Flurochloridone         | C12H10Cl2F3NO               | 19.5   | y=0.633831x+0.010765        | 0.9991                                    | 311.0086  | 174.0525,187.0240,313.0056,145.0260,172.0369 |
| 141 | fluroxypyr-meptyl       | C15H21Cl2FN2O3              | 25.962 | y=0.783850x+0.006503        | 0.9987                                    | 180.9730  | 208.9679,182.9699,210.9657,55.0542,209.9758  |
| 142 | Flurprimidol            | C15H15F3N2O2                | 16.973 | y=6.663562x+0.028710        | 0.9976                                    | 269.0533  | 107.0240,189.0158,79.0291,270.0555,95.0292   |
| 143 | Flusilazole             | C16H15F2N3Si                | 22.86  | y=3.678769x+0.004689        | 0.9983                                    | 233.0593  | 206.0544,234.0621,96.0370,165.0699,220.0701  |
| 144 | Flutolanil              | C17H16F3NO2                 | 22.149 | y=8.914388x-0.108609        | 0.9936                                    | 173.0209  | 145.0260,281.0658,174.0248,323.1128,282.0705 |
| 145 | Flutriafol              | C16H13F2N3O                 | 21.743 | y=3.959201x+0.002749        | 0.9980                                    | 123.0241  | 164.0619,219.0616,95.0292,83.0478,82.0400    |
| 146 | Fluxapyroxad            | C18H12F5N3O                 | 27.245 | y=4.178230x+0.029896        | 0.9994                                    | 159.0364  | 381.0895,160.0392,139.0302,382.0926,221.0447 |
| 147 | Fonofos                 | C10H15OPS2                  | 15.128 | y=9.712048x-0.040653        | 0.9976                                    | 108.9872  | 137.0184,110.0185,109.0107,62.9453,80.9558   |
| 148 | Fuberidazole            | C11H8N2O                    | 17.164 | y=13.427743x-0.509778       | 0.9894                                    | 184.0631  | 156.0682,155.0604,183.0553,185.0665,129.0573 |
| 149 | Furalaxyl               | C17H19NO4                   | 20.814 | y=8.517960x-0.019377        | 0.9985                                    | 95.0128   | 242.1176,152.0706,146.0964,132.0808,96.0164  |
| 150 | furametpyr              | C17H20ClN3O2                | 28.116 | y=0.732135x+0.004262        | 0.9940                                    | 157.0163  | 159.0132,298.1550,291.1133,188.0706,158.0190 |
| 151 | Furathiocarb            | C18H26N2O5S                 | 28.226 | y=1.826380x-0.014555        | 0.9987                                    | 163.0754  | 135.0804,194.0396,164.0832,325.1342,107.0491 |
| 152 | Furilazole              | C11H13Cl2NO3                | 14.326 | y=1.461550x + 1.122685E-004 | 0.9984                                    | 219.9927  | 221.9894,70.0651,146.0367,81.0335,262.0032   |
| 153 | Furmecyclox             | C14H21NO3                   | 16.49  | y=12.805949x-0.110296       | 0.9936                                    | 123.0440  | 81.0335,124.0476,53.0386,67.0542,22.0362     |
| 154 | Griseofulvin            | C17H17ClO6                  | 31.23  | y=0.151823x+0.002852        | 0.9899                                    | 321.0524  | 310.0239,138.0675,352.0708,215.0106,214.0027 |
| 155 | Haloxypof               | C15H11ClF3NO4               | 21.375 | y=2.642129x-0.009487        | 0.9984                                    | 316.0347  | 288.0058,375.0480,289.0119,318.0337,290.0043 |
| 156 | Haloxypof-2-ethoxyethyl | C19H19ClF3NO5               | 26.392 | y=1.703054x+0.004634        | 0.9973                                    | 302.0190  | 288.0034,316.0335,304.0161,91.0542,289.0112  |
| 157 | Haloxypof-methyl        | C16H13ClF3NO4               | 21.376 | y=2.642129x-0.009487        | 0.9984                                    | 316.0347  | 288.0034,375.0480,318.0321,289.0067,290.0004 |
| 158 | Hexazinone              | C12H20N4O2                  | 25.614 | y=1.665882x-0.084441        | 0.3610                                    | 171.0876  | 83.0240,71.0604,128.0818,67.0542,85.0760     |
| 159 | Imazamethabenz-methyl   | C16H20N2O3                  | 21.738 | y=1.129695x+6.445813E-005   | 0.9931                                    | 187.0502  | 256.1206,144.0444,117.0573,214.0737,172.0757 |
| 160 | Indanofan               | C20H17ClO3                  | 27.571 | y=0.339538x+0.003427        | 0.9982                                    | 138.9945  | 159.0441,174.0675,105.0335,103.0542,131.0491 |
| 161 | Indaziflam              | C16H20FN5                   | 27.144 | y=1.348972x+0.036672        | 0.9965                                    | 158.0836  | 286.1462,129.0699,128.0619,138.0774,144.0932 |
| 162 | Iodofenphos             | C8H8Cl2IO3PS                | 22.055 | y=0.711829x+0.012288        | 0.9994                                    | 376.8659  | 378.8631,124.9821,78.9943,93.0100,96.9840    |
| 163 | Ipconazole              | C18H24ClN3O                 | 29.049 | y=7.309368x+0.005143        | 0.9921                                    | 125.0153  | 83.0491,70.0400,129.0699,127.0124,249.1041   |
| 164 | Ipfencarbazone          | C18H14Cl2F2N4O <sub>2</sub> | 30.055 | y=0.298323x+0.011960        | 0.9954                                    | 198.0725  | 156.0255,156.0581,194.0116,228.9804,158.9637 |
| 165 | Iprodione               | C13H13Cl2N3O3               | 26.744 | y=0.187632x+0.005876        | 0.5138                                    | 314.0094  | 186.9586,316.0066,188.9557,244.9879,187.9664 |
| 166 | Isazofos                | C9H17ClN3O3PS               | 16.034 | y=2.291801x-0.007771        | 0.9990                                    | 96.9508   | 118.9881,161.0350,162.0429,120.9855,119.9959 |

| No. | Pesticides              | Elemental composition | Rt/min | Linear equations         | Correlation coefficient (R <sup>2</sup> ) | Precursor | Product ion                                  |
|-----|-------------------------|-----------------------|--------|--------------------------|-------------------------------------------|-----------|----------------------------------------------|
| 167 | Isocarbamid             | C8H15N3O2             | 14.846 | y=3.833870x-0.113953     | 0.9975                                    | 142.0611  | 130.0611,70.0287,113.0346,85.0396,143.0635   |
| 168 | Isocarbophos            | C11H16NO4PS           | 19.295 | y=2.192220x+0.0006436130 | 0.9981                                    | 135.9977  | 120.0206,121.0284,92.0257,45.0335,109.9824   |
| 169 | Isofenphos-Methyl       | C14H22NO4PS           | 20.035 | y=4.414576x+0.027191     | 0.9976                                    | 199.0155  | 121.0284,120.0209,58.0651,92.0260,109.9824   |
| 170 | Isomethiozin            | C12H20N4OS            | 19.105 | y=2.949183x+0.010565     | 0.9993                                    | 225.0805  | 198.0662,226.0883,184.0539,199.0740,82.0651  |
| 171 | Isoprocab               | C11H15NO2             | 10.638 | y=8.753542x-0.087035     | 0.9984                                    | 121.0648  | 136.0883,91.0542,77.0386,103.0542,93.0699    |
| 172 | Isopropalin             | C15H23N3O4            | 19.994 | y=3.297614x+0.008617     | 0.9963                                    | 280.1292  | 238.0822,264.1343,281.1321,222.0873,180.0893 |
| 173 | Isoprothiolane          | C12H18O4S2            | 22.26  | y=3.569801x+0.003385     | 0.9994                                    | 117.9905  | 161.9804,188.9675,204.0273,144.9776,159.9283 |
| 174 | Isoproturon             | C12H18N2O             | 17.535 | y=1.849168x-0.026338     | 0.9992                                    | 146.0600  | 128.0495,72.0444,161.0835,91.0542,206.1414   |
| 175 | Isopyrazam              | C20H23F2N3O           | 29.734 | y=0.274319x+0.014439     | 0.9946                                    | 159.0364  | 303.1178,359.1804,316.1256,276.1131,184.0757 |
| 176 | Isoxadifen-ethyl        | C18H17NO3             | 24.759 | y=3.249693x-0.018342     | 0.9981                                    | 204.0808  | 165.0699,105.0335,222.0913,232.0757,182.0726 |
| 177 | Isoxaflutole            | C15H12F3NO4S          | 19.495 | y=0.532250x-0.040271     | 0.8639                                    | 279.0505  | 160.0135,252.0400,189.0163,253.0413,132.0186 |
| 178 | Lenacil                 | C13H18N2O2            | 25.063 | y=27.835647x-0.228977    | 0.9890                                    | 153.0659  | 136.0393,154.0687,110.0600,80.0495,67.0542   |
| 179 | Lindane                 | C6H6Cl6               | 14.773 | y=2.261958x-0.002014     | 0.9988                                    | 180.9373  | 182.9344,218.9111,112.0074,216.9140,77.0386  |
| 180 | MCPA-2-ETHYLHEXYL ESTER | C17H25ClO3            | 21.494 | y=2.921070x+0.091040     | 0.9996                                    | 200.0235  | 141.0102,312.1487,202.0208,125.0153,155.0258 |
| 181 | MCPA-isooctyl           | C17H25ClO3            | 22.23  | y=1.523069x+0.002554     | 0.9992                                    | 312.1487  | 200.0235,155.0258,314.1463,141.0102,202.0208 |
| 182 | Mecarbam                | C10H20NO5PS2          | 20.661 | y=2.511644x-0.033560     | 0.9973                                    | 131.0036  | 96.9508,160.0427,159.0349,124.9821,64.9787   |
| 183 | Mefenacet               | C16H14N2O2S           | 28.654 | y=13.918891x+0.185108    | 0.9943                                    | 192.0114  | 77.0386,136.0215,106.0651,120.0808,118.0651  |
| 184 | Mefenpyr-diethyl        | C16H18Cl2N2O4         | 26.601 | y=2.280238x-0.075305     | 0.9903                                    | 252.9930  | 254.9902,185.9872,299.0349,227.0137,187.9843 |
| 185 | Mepanipyrim             | C14H13N3              | 21.609 | y=4.646827x-0.071901     | 0.9940                                    | 222.1026  | 223.1104,221.0947,207.0791,38.5190,224.1129  |
| 186 | Mepronil                | C17H19NO2             | 24.432 | y=4.341646x-0.110195     | 0.6425                                    | 119.0491  | 91.0542,269.1410,65.0386,210.0675,120.0528   |
| 187 | Metalaxyl               | C15H21NO4             | 17.729 | y=2.237503x-0.004404     | 0.9979                                    | 160.1121  | 206.1176,132.0808,146.0964,192.1383,130.0863 |
| 188 | Metamitron              | C10H10N4O             | 22.782 | y=0.178600x-0.016270     | 0.9955                                    | 202.0849  | 174.0900,104.0495,173.0822,186.0662,77.0386  |
| 189 | Metazachlor             | C14H16ClN3O           | 20.139 | y=1.193485x-0.001059     | 0.9959                                    | 132.0808  | 133.0886,117.0573,81.0447,209.0602,134.0964  |
| 190 | Metconazole             | C17H22ClN3O           | 27.574 | y=0.627675x+0.017865     | 0.9978                                    | 125.0134  | 70.0400,83.0491,82.0400,125.0961,127.0165    |
| 191 | Methabenzthiazuron      | C10H11N3OS            | 12.774 | y=1.445045x+0.273855     | 0.9973                                    | 136.0215  | 164.0403,135.0137,108.0028,163.0324,68.9793  |
| 192 | Methacrifos             | C7H13O5PS             | 10.034 | y=2.002969x-0.002101     | 0.9996                                    | 124.9821  | 207.9954,180.0005,93.0100,78.9943,110.0127   |
| 193 | Methamidophos           | C2H8NO2PS             | 6.221  | y=0.491105x-0.037458     | 0.7132                                    | 94.0052   | 95.0131,141.0008,63.9947,46.9950,48.0028     |
| 194 | Methfuroxam             | C14H15NO2             | 19.189 | y=1.262343x+0.004733     | 0.9995                                    | 229.1097  | 137.0597,67.0542,138.0627,95.0491,109.0648   |

| No. | Pesticides            | Elemental composition | Rt/min | Linear equations          | Correlation coefficient (R <sup>2</sup> ) | Precursor | Product ion                                  |
|-----|-----------------------|-----------------------|--------|---------------------------|-------------------------------------------|-----------|----------------------------------------------|
| 195 | Methoprotetryne       | C11H21N5OS            | 22.908 | y=1.829768x+0.003630      | 0.9993                                    | 256.1227  | 212.0964,184.0665,213.1043,170.0495,171.0573 |
| 196 | Metobromuron          | C9H11BrN2O2           | 16.398 | y=0.288404x+0.031018      | 0.7498                                    | 198.9451  | 196.9471,170.9501,168.9522,61.0522,90.0338   |
| 197 | Metrafenone           | C19H21BrO5            | 29.767 | y=0.564900x+0.010686      | 0.9932                                    | 393.0332  | 395.0314,379.0363,377.0383,209.0808,378.0417 |
| 198 | Metribuzin            | C8H14N4OS             | 16.941 | y=3.216293x-0.039473      | 0.9952                                    | 198.0696  | 199.0697,46.9950,144.0464,82.0651,74.0059    |
| 199 | Mexacarbate           | C12H18N2O2            | 15.917 | y=2.280394x+0.005566      | 0.9995                                    | 165.1148  | 57.0209,150.0913,164.1070,56.0131,134.0726   |
| 200 | Molinate              | C9H17NOS              | 10.6   | y=5.490722x+0.003767      | 0.9965                                    | 126.0913  | 55.0542,98.0964,83.0855,127.0946,70.0651     |
| 201 | Monalide              | C13H18ClNO            | 16.358 | y=2.889353x-0.008776      | 0.9951                                    | 127.0182  | 85.1012,197.0604,129.0154,57.0699,199.0575   |
| 202 | Monocrotophos         | C7H14NO5P             | 13.274 | y=4.541140x+0.025208      | 0.9962                                    | 127.0155  | 109.0049,67.0178,97.0522,58.0287,192.0182    |
| 203 | Monolinuron           | C9H11ClN2O2           | 14.482 | y=0.125916x+0.002215      | 0.9418                                    | 152.9976  | 125.0025,90.0338,154.9948,127.0106,61.0522   |
| 204 | Musk Ketone           | C14H18N2O5            | 18.945 | y=2.520735x-0.010305      | 0.9993                                    | 279.0975  | 128.0621,115.0542,91.0542,280.1009,77.0386   |
| 205 | Musk Moskene          | C14H18N2O4            | 17.161 | y=3.311710x-1.642025E-004 | 0.9970                                    | 263.1026  | 128.0621,115.0542,141.0699,264.105,129.0699  |
| 206 | Musk Tibetene         | C13H18N2O4            | 18.123 | y=3.599497x+0.019387      | 0.9922                                    | 251.1026  | 91.0542,115.0542,128.0621,77.0386,252.1057   |
| 207 | Myclobutanil          | C15H17ClN4            | 22.722 | y=0.916887x+0.004833      | 0.9984                                    | 179.0245  | 150.0105,179.0622,152.0387,152.0077,82.0400  |
| 208 | Nitrapyrin            | C6H3Cl4N              | 9.229  | y=0.456427x+0.001102      | 0.9923                                    | 193.9326  | 195.9296,197.9267,132.9606,76.0182,123.9949  |
| 209 | Nitrofen              | C12H7Cl2NO3           | 23.135 | y=0.521376x+0.008365      | 0.9931                                    | 282.9797  | 202.0180,284.9770,139.0542,204.0153,252.9818 |
| 210 | Nitrothal-Isopropyl   | C14H17NO6             | 19.416 | y=1.745560x-0.016301      | 0.9985                                    | 194.0084  | 236.0553,212.0190,254.0659,148.0155,195.0162 |
| 211 | Norflurazon           | C12H9ClF3N3O          | 25.147 | y=5.905172x+0.097038      | 0.9927                                    | 303.0381  | 145.0260,173.0321,102.0105,302.0302,305.0355 |
| 212 | Noruron               | C13H22N2O             | 18.434 | y=1.589218x-0.028192      | 0.9974                                    | 72.0444   | 80.0620,79.0542,91.0542,153.1022,67.0542     |
| 213 | Novaluron             | C17H9ClF8N2O4         | 8.178  | y=0.499268x-0.006645      | 0.9933                                    | 142.0054  | 308.9986,144.0023,114.0105,310.9954,68.9947  |
| 214 | Noviflumuron          | C17H7Cl2F9N2O3        | 11.186 | y=1.492709x+0.005575      | 0.9972                                    | 193.9570  | 195.9538,344.9553,165.9621,346.9522,167.9587 |
| 215 | Nuarimol              | C17H12ClFN2O          | 25.702 | y=1.231931x-0.005733      | 0.9995                                    | 107.0240  | 138.9945,235.0302,203.0604,123.0229,314.0617 |
| 216 | Octhilinone           | C11H19NOS             | 16.205 | y=1.490837x-0.009246      | 0.9949                                    | 114.0008  | 100.9930,102.0008,115.0086,86.9899,180.1383  |
| 217 | Ofurace               | C14H16ClNO3           | 24.742 | y=1.867572x-0.017437      | 0.9882                                    | 232.0968  | 132.0808,186.0913,160.0160,204.1019,144.0808 |
| 218 | Orbencarb             | C12H16ClNOS           | 18.088 | y=3.374692x-0.028247      | 0.9961                                    | 222.0947  | 100.0757,72.0444,125.0153,223.0977,127.0124  |
| 219 | Ortho-Dichlorobenzene | C6H4Cl2               | 4.717  | y=0.386869x+0.009607      | 0.9855                                    | 145.9685  | 147.9655,110.9996,75.0229,112.9967,149.9627  |
| 220 | Oryastrobin           | C18H25N5O5            | 28.172 | y=1.047556x-0.001300      | 0.9919                                    | 116.0495  | 205.0972,132.0444,58.0287,140.0818,170.0924  |
| 221 | oxadiazon             | C15H18Cl2N2O3         | 22.671 | y=3.751548x+0.021162      | 0.9984                                    | 174.9586  | 176.9557,258.0321,302.0219,260.0292,111.9949 |
| 222 | Oxadixyl              | C14H18N2O4            | 24.079 | y=8.827054x-1.156465      | 0.9797                                    | 132.0808  | 163.0992,105.0699,120.0808,77.0386,118.0651  |
| 223 | Oxycarboxin           | C12H13NO4S            | 26.168 | y=0.187237x+0.003685      | 0.9964                                    | 119.0366  | 91.0416,175.0060,64.0308,63.0229,93.0573     |

| No. | Pesticides                   | Elemental composition | Rt/min | Linear equations          | Correlation coefficient (R <sup>2</sup> ) | Precursor | Product ion                                  |
|-----|------------------------------|-----------------------|--------|---------------------------|-------------------------------------------|-----------|----------------------------------------------|
| 224 | Oxyfluorfen                  | C15H11ClF3NO4         | 22.893 | y=1.245871x-0.001566      | 0.9956                                    | 252.0393  | 300.0034,317.0061,253.0430,280.0216,361.0323 |
| 225 | parathion                    | C10H14NO5PS           | 19.072 | y=0.506395x+0.005250      | 0.9949                                    | 291.0325  | 96.9508,109.0049,155.0036,139.0264,261.0345  |
| 226 | Parathion-Methyl             | C8H10NO5PS            | 17.202 | y=0.566279x-3.784450E-004 | 0.9953                                    | 109.0049  | 124.9821,263.0012,78.9943,93.0100,245.9984   |
| 227 | Pebulate                     | C10H21NOS             | 9.305  | y=2.136928x-0.008008      | 0.9987                                    | 128.1070  | 57.0699,72.0444,161.0869,132.0842,58.0666    |
| 228 | Penconazole                  | C13H15Cl2N3           | 20.246 | y=4.608096x+0.013161      | 0.9978                                    | 158.9763  | 248.0949,160.9734,250.0922,249.0978,162.9705 |
| 229 | Pentanochlor                 | C13H18ClNO            | 18.339 | y=5.838964x-0.033208      | 0.9923                                    | 141.0340  | 143.0310,197.0602,106.0651,140.0262,71.0855  |
| 230 | Penthiopyrad                 | C16H20F3N3OS          | 24.163 | y=4.706454x+0.012310      | 0.9966                                    | 177.0270  | 302.0569,152.0165,151.0574,166.0811,178.0288 |
| 231 | Pentoxazone                  | C17H17ClFNO4          | 28.359 | y=2.476352x-0.023944      | 0.9958                                    | 70.0413   | 285.0187,186.9831,286.0266,67.054,287.0163   |
| 232 | Pethoxamid                   | C16H22ClNO2           | 20.834 | y=0.791635x+0.002530      | 0.9965                                    | 260.1645  | 91.0542,186.9831,286.0266,67.0542,287.0163   |
| 233 | Phenothrin                   | C23H26O3              | 28.189 | y=1.580151x-0.015875      | 0.9963                                    | 183.0804  | 123.1168,81.0699,77.0386,184.0859,79.0542    |
| 234 | Phorate                      | C7H17O2PS3            | 13.48  | y=6.490644x-0.129021      | 0.9962                                    | 75.0263   | 96.9508,64.9787,121.0413,46.9950,93.0100     |
| 235 | Phorate-Sulfone              | C7H17O4PS3            | 18.827 | y=1.993645x+0.011267      | 0.9995                                    | 96.9508   | 124.9821,153.0134,199.0011,170.9698,45.9872  |
| 236 | Phorate-Sulfoxide            | C7H17O3PS3            | 18.522 | y=1.185241x+0.010379      | 0.9979                                    | 96.9508   | 124.9821,75.0263,153.0134,199.0011,45.9872   |
| 237 | Phosfolan                    | C7H14NO3PS2           | 20.373 | y=0.472359x-0.001362      | 0.9961                                    | 139.9566  | 91.9749,60.0028,58.9950,167.9879,80.9736     |
| 238 | Phosphamidon                 | C10H19ClNO5P          | 16.924 | y=0.412353x+0.008889      | 0.9930                                    | 127.0155  | 72.0808,264.0995,109.0049,138.0913,58.0651   |
| 239 | Phthalide                    | C8H2Cl4O2             | 19.461 | y=1.210916x+0.015353      | 0.9960                                    | 242.8747  | 240.8776,244.8718,269.8803,212.8827,246.8689 |
| 240 | Picolinafen                  | C19H12F4N2O2          | 27.207 | y=1.059991x+0.017625      | 0.9952                                    | 238.0474  | 376.0829,239.0553,145.0260,377.0868,83.0292  |
| 241 | Piperalin                    | C16H21Cl2NO2          | 25.476 | y=0.934558x+0.017353      | 0.9984                                    | 314.0709  | 172.9556,112.1121,316.0682,174.9527,230.9974 |
| 242 | Pirimiphos-methyl-N-desethyl | C9H16N3O3PS           | 17.639 | y=0.739502x+8.546102E-004 | 0.9984                                    | 277.0645  | 262.0410,135.0791,124.9821,152.0818,168.0590 |
| 243 | Plifenatate                  | C10H7Cl5O2            | 17.234 | y=0.199448x+0.002219      | 0.9971                                    | 241.9032  | 169.9685,239.9062,171.9656,174.9684,243.9003 |
| 244 | Prodiamine                   | C13H17F3N4O4          | 18.44  | y=1.000544x-0.003199      | 0.9925                                    | 321.0805  | 279.0336,275.0750,216.0291,305.0856,203.0377 |
| 245 | Profluralin                  | C14H16F3N3O4          | 15.242 | y=0.759143x+0.004896      | 0.9995                                    | 318.0696  | 55.0542,330.1060,264.0227,69.0335,248.0278   |
| 246 | Profoxydim                   | C24H32ClNO4S          | 9.169  | y=2.688195x-0.006498      | 0.9950                                    | 128.0023  | 129.9988,65.0386,100.0074,129.0047,91.0542   |
| 247 | Promecarb                    | C12H17NO2             | 13.45  | y=4.177696x-0.031385      | 0.9965                                    | 135.0804  | 57.0209,150.1039,56.0131,91.0542,107.0855    |
| 248 | Prometon                     | C10H19N5O             | 14.379 | y=3.427406x-0.021365      | 0.9967                                    | 168.0880  | 210.1349,183.1115,225.1584,58.0651,112.0505  |
| 249 | Prometryn                    | C10H19N5S             | 17.717 | y=3.902703x+0.015813      | 0.9992                                    | 184.0651  | 241.1356,226.1121,105.5440,58.0651,199.0886  |
| 250 | Propachlor                   | C11H14ClNO            | 11.952 | y=2.466518x-0.075990      | 0.9954                                    | 120.0808  | 93.0573,77.0386,176.1070,120.0444,118.0651   |
| 251 | Propazine                    | C9H16ClN5             | 14.687 | y=2.965820x-0.016453      | 0.9971                                    | 214.0854  | 172.0385,229.1089,58.0651,187.0619,174.0355  |

| No. | Pesticides              | Elemental composition | Rt/min | Linear equations      | Correlation coefficient (R <sup>2</sup> ) | Precursor | Product ion                                  |
|-----|-------------------------|-----------------------|--------|-----------------------|-------------------------------------------|-----------|----------------------------------------------|
| 252 | Propisochlor            | C15H22ClNO2           | 17.685 | y=6.238989x+0.045070  | 0.9974                                    | 162.0913  | 132.0808,146.0964,117.0573,144.0808,223.0758 |
| 253 | Propyzamide             | C12H11Cl2NO           | 15.168 | y=4.542358x+0.015510  | 0.9981                                    | 172.9556  | 174.9527,144.9606,170.9637,254.0134,239.9977 |
| 254 | Prosulfocarb            | C14H21NOS             | 17.865 | y=3.876137x+0.002316  | 0.9994                                    | 128.1069  | 91.0541,86.0600,251.1337,65.0386,77.0386     |
| 255 | Prothioconazole-desthio | C14H15Cl2N3O          | 22.857 | y=3.810987x+0.010657  | 0.9994                                    | 186.0429  | 188.0401,125.0153,82.0400,70.0400,89.0386    |
| 256 | Prothiofos              | C11H15Cl2O2PS2        | 22.189 | y=2.668461x-0.002414  | 0.9986                                    | 112.9279  | 161.9634,266.9465,308.9934,163.9605,238.9152 |
| 257 | Pyracarbolid            | C13H15NO2             | 19.57  | y=4.953142x-0.040654  | 0.9991                                    | 125.0597  | 97.0284,55.0178,107.0491,126.0629,83.0491    |
| 258 | Pyrametostrobin         | C21H23N3O4            | 8.073  | y=1.749333x-0.095973  | 0.9982                                    | 133.0495  | 104.0495,105.0546,132.0444,77.0386,162.0550  |
| 259 | Pyributicarb            | C18H22N2O2S           | 26.672 | y=5.520428x-0.029621  | 0.9996                                    | 165.0659  | 108.0444,135.0804,59.9664,181.0430,109.0522  |
| 260 | Pyridaphenthion         | C14H17N2O4PS          | 26.907 | y=0.198591x+0.003304  | 0.4203                                    | 340.0641  | 199.0866,96.9508,188.0580,204.0352,77.0386   |
| 261 | Pyrifthalid             | C15H14N2O4S           | 29.436 | y=0.356524x+0.001018  | 0.5221                                    | 274.0771  | 273.0692,318.0669,317.0580,303.0434,275.0708 |
| 262 | Pyrimethanil            | C12H13N3              | 15.322 | y=11.042643x-0.029871 | 0.9969                                    | 198.1026  | 199.1104,77.0386,200.1127,183.0791,91.0416   |
| 263 | Pyrimorph               | C22H25ClN2O2          | 34.123 | y=0.139496x+0.027734  | 0.9527                                    | 242.0367  | 244.0326,298.0988,384.1599,299.1067,243.0397 |
| 264 | Pyriofenone             | C18H20ClNO5           | 26.66  | y=2.311233x-0.005190  | 0.9987                                    | 350.0790  | 334.0841,352.0767,209.0808,336.0818,351.0822 |
| 265 | Pyriproxyfen            | C20H19NO3             | 28.526 | y=-0.161965x+0.143519 | 1.0000                                    | 226.0988  | 136.0757,77.0386,96.0444,186.0675,78.0338    |
| 266 | Pyroquilon              | C11H11NO              | 15.055 | y=3.936159x-0.033883  | 0.9987                                    | 173.0835  | 130.0651,172.0757,144.0808,115.0542,117.0573 |
| 267 | Quinoclamine            | C10H6ClNO2            | 18.337 | y=0.056910x-0.004314  | 0.9992                                    | 172.0393  | 207.0082,209.0056,144.0444,89.0386,76.0308   |
| 268 | Quinoxifen              | C15H8Cl2FNO           | 24.989 | y=2.052041x+0.016650  | 0.9976                                    | 237.0584  | 272.0273,306.9962,238.0617,274.0247,308.9934 |
| 269 | Quizalofop-Ethyl        | C19H17ClN2O4          | 31.669 | y=7.618428x-0.011928  | 0.9834                                    | 299.0582  | 372.0871,163.0058,301.0558,244.0398,243.0320 |
| 270 | Rabenzazole             | C12H12N4              | 19.058 | y=2.760821x+0.023986  | 0.9964                                    | 212.1057  | 170.0713,195.0791,118.0526,211.0978,194.0713 |
| 271 | Resmethrin              | C22H26O3              | 26.268 | y=1.944152x+0.094249  | 0.9977                                    | 128.0621  | 123.1168,143.0855,171.0804,81.0699,91.0542   |
| 272 | Schradan                | C8H24N4O3P2           | 14.328 | y=0.0009x+0.0007      | 0.9995                                    | 135.0682  | 153.0787,92.0260,243.0896,199.0393,196.1209  |
| 273 | Sebuthylazine           | C9H16ClN5             | 16.18  | y=5.594330x+0.012166  | 0.9990                                    | 200.0697  | 202.0673,214.0854,201.0737,68.0243,122.0713  |
| 274 | Sebuthylazine-desethyl  | C7H12ClN5             | 14.554 | y=5.666025x-0.001108  | 0.9998                                    | 172.0385  | 174.0355,104.0010,68.0243,186.0541,69.0447   |
| 275 | Secbumeton              | C10H19N5O             | 15.772 | y=6.832757x-0.047519  | 0.9957                                    | 196.1193  | 169.0958,210.1349,197.1245,154.0723,112.0505 |
| 276 | Sedaxane                | C18H19F2N3O           | 29.041 | y=2.658732x+0.032519  | 0.9882                                    | 159.0364  | 172.1121,130.0651,234.0839,139.0302,160.0394 |
| 277 | Silthiofam              | C13H21NOSSi           | 16.644 | y=7.744171x+0.003004  | 0.9966                                    | 252.0873  | 253.0894,75.0261,197.0451,254.0851,210.0403  |
| 278 | Simazine                | C7H12ClN5             | 14.299 | y=1.299262x-0.013953  | 0.9946                                    | 201.0776  | 186.0541,173.0463,68.0243,138.0774,96.0556   |
| 279 | Simeconazole            | C14H20FN3OSi          | 17.354 | y=6.293869x+0.026595  | 0.9986                                    | 121.0448  | 75.0261,73.0468,195.0636,83.0478,123.0247    |
| 280 | Simeton                 | C8H15N5O              | 13.831 | y=2.003621x+0.018336  | 0.9956                                    | 169.0958  | 139.0614,197.1271,182.1036,154.0723,68.0243  |



| No. | Pesticides                 | Elemental composition | Rt/min | Linear equations          | Correlation coefficient (R <sup>2</sup> ) | Precursor | Product ion                                  |
|-----|----------------------------|-----------------------|--------|---------------------------|-------------------------------------------|-----------|----------------------------------------------|
| 281 | Simetryn                   | C8H15N5S              | 17.351 | y=4.256864x-0.069577      | 0.9915                                    | 213.1043  | 155.0386,170.0495,68.0243,198.0808,185.0730  |
| 282 | Spirodiclofen              | C21H24Cl2O4           | 30.168 | y=1.874694x+0.081036      | 0.1814                                    | 71.0855   | 156.9606,259.0520,109.0648,312.0315,158.9588 |
| 283 | Spiromesifen               | C23H30O4              | 26.71  | y=1.260708x+2.814890E-004 | 0.9984                                    | 272.1407  | 254.1301,273.1485,57.0699,83.0491,255.1380   |
| 284 | Spirotetramat-mono-hydroxy | C18H25NO3             | 30.028 | y=6.705001x+10.096078     | 0.4628                                    | 123.0804  | 230.1176,119.0855,303.1829,286.1801,146.0726 |
| 285 | Spiroxamine                | C18H35NO2             | 17.19  | y=9.766720x-0.053675      | 0.9958                                    | 100.1121  | 72.0808,98.0726,57.0699,58.0651,98.0964      |
| 286 | Sulfallate                 | C8H14ClNS2            | 13.587 | y=5.952942x+0.016300      | 0.9980                                    | 188.0562  | 59.9902,88.0215,72.0808,189.0589,190.0525    |
| 287 | Sulfluramid                | C10H6F17NO2S          | 5.897  | y=2.946348x-0.014078      | 0.9929                                    | 108.0114  | 79.9801,68.9947,447.9988,130.9915,168.9883   |
| 288 | Sulfotep                   | C8H20O5P2S2           | 13.374 | y=2.166755x-0.008157      | 0.9974                                    | 322.0222  | 237.9283,201.9882,293.9909,265.9596,209.8970 |
| 289 | TCMTB                      | C9H6N2S3              | 21.725 | y=2.646649x+0.012179      | 0.9948                                    | 179.9936  | 136.0215,108.0028,180.9995,135.0137,68.9793  |
| 290 | Tebufenpyrad               | C18H24ClN3O           | 27.573 | y=1.103022x+0.007965      | 0.9962                                    | 318.1368  | 171.0320,276.0898,333.1602,173.0295,145.0525 |
| 291 | Tebupirimfos               | C13H23N2O3PS          | 16.298 | y=2.569434x-0.019606      | 0.9976                                    | 234.0222  | 261.0457,276.0692,152.0944,318.1161,137.0709 |
| 292 | Tebutam                    | C15H23NO              | 13.377 | y=3.039085x+0.014719      | 1.0000                                    | 190.1224  | 57.0699,91.0538,92.0581,106.0650,65.0386     |
| 293 | Tebuthiuron                | C9H16N4OS             | 10.226 | y=1.333635x-0.042694      | 0.9966                                    | 171.0825  | 156.0590,170.0746,172.0848,57.0699,157.0634  |
| 294 | Teflubenzuron              | C14H6Cl2F4N2O2        | 8.076  | y=0.715899x+0.010550      | 0.9973                                    | 196.9605  | 198.9576,134.9808,141.9861,200.9547,99.0041  |
| 295 | Terbacil                   | C9H13ClN2O2           | 15.723 | y=1.793257x+0.007335      | 0.9943                                    | 161.0112  | 160.0034,163.0084,116.9976,56.0620,162.0005  |
| 296 | Terbucarb                  | C17H27NO2             | 17.247 | y=12.096218x-0.063863     | 0.9931                                    | 205.1587  | 220.1822,177.1274,206.1620,57.0699,161.0961  |
| 297 | Terbufos                   | C9H21O2PS3            | 15.054 | y=4.234770x+0.037155      | 0.9940                                    | 230.9732  | 57.0699,56.0620,96.9508,64.9787,55.0542      |
| 298 | Terbufos-Sulfone           | C9H21O5PS2            | 20.254 | y=2.681909x+0.003543      | 0.9996                                    | 96.9508   | 124.9821,199.0011,153.0134,57.0699,170.9698  |
| 299 | Terbumeton                 | C10H19N5O             | 14.749 | y=5.027016x+0.023964      | 0.9945                                    | 169.0958  | 210.1349,154.0723,141.0645,192.0880,168.0880 |
| 300 | Terbuthylazine             | C9H16ClN5             | 15.046 | y=5.862237x+0.007813      | 0.9985                                    | 214.0854  | 173.0463,216.0826,138.0774,172.0385,229.1089 |
| 301 | Terbutryn                  | C10H19N5S             | 18.163 | y=4.600924x+0.016783      | 0.9985                                    | 185.0730  | 226.1121,170.0495,68.0243,241.1356,105.5440  |
| 302 | Tetraconazole              | C13H11Cl2F4N3O        | 19.423 | y=3.317369x+0.013362      | 0.9977                                    | 336.0521  | 338.0494,170.9774,158.9763,337.0550,172.9747 |
| 303 | Tetrasul                   | C12H6Cl4S             | 24.271 | y=2.223237x-0.010203      | 0.9961                                    | 251.9562  | 253.9533,323.8910,321.8939,325.8880,252.9593 |
| 304 | Thenylchlor                | C16H18ClNO2S          | 25.732 | y=1.530259x-8.471053E-004 | 0.9997                                    | 127.0212  | 288.1053,141.0369,58.9950,111.9977,287.0974  |
| 305 | Thiazopyr                  | C16H17F5N2O2S         | 19.049 | y=1.175057x-0.007532      | 0.9943                                    | 327.0973  | 60.0028,363.1126,306.0081,58.9950,349.0970   |
| 306 | Thifluzamide               | C13H6Br2F6N2O2S       | 23.038 | y=2.040262x-0.025376      | 0.9944                                    | 193.9882  | 165.9933,124.9667,448.9212,446.9232,428.9149 |
| 307 | Thiobencarb                | C12H16ClNOS           | 18.617 | y=6.334599x+0.014253      | 0.9984                                    | 100.0757  | 72.0444,125.0153,89.0386,137.0027,138.9984   |
| 308 | Thiofanox                  | C9H18N2O2S            | 6.773  | y=0.505659x-0.002328      | 0.9937                                    | 115.0992  | 161.0869,55.0542,61.0106,73.0522,83.0855     |

| No. | Pesticides             | Elemental composition | Rt/min | Linear equations          | Correlation coefficient (R <sup>2</sup> ) | Precursor | Product ion                                  |
|-----|------------------------|-----------------------|--------|---------------------------|-------------------------------------------|-----------|----------------------------------------------|
| 309 | Thiometon              | C6H15O2PS3            | 13.842 | y=2.341782x-0.004672      | 0.9992                                    | 124.9821  | 88.0341,60.0028,61.0106,89.0419,93.0100      |
| 310 | Tiocarbazil            | C16H25NOS             | 19.339 | y=2.343573x-0.004359      | 0.9970                                    | 91.0542   | 57.0699,100.0757,156.1383,70.0287,65.0386    |
| 311 | Tolclofos-Methyl       | C9H11Cl2O3PS          | 17.364 | y=4.800039x+0.045508      | 0.9972                                    | 264.9850  | 266.9821,124.9821,249.9615,93.0100,78.9943   |
| 312 | Tolfenpyrad            | C21H22ClN3O2          | 34.028 | y=5.170900x-0.256428      | 0.9941                                    | 171.0320  | 197.0961,383.1395,137.0709,211.0992,145.0527 |
| 313 | trans-Diallate         | C10H17Cl2NOS          | 13.768 | y=0.616933x-0.008092      | 0.9922                                    | 234.0714  | 86.0600,108.9606,236.0685,110.9577,70.0287   |
| 314 | triallate              | C10H16Cl3NOS          | 15.977 | y=2.970806x-0.002003      | 0.9985                                    | 86.0600   | 268.0324,142.9217,144.9187,270.0295,72.9840  |
| 315 | Triamiphos             | C12H19N6OP            | 24.125 | y=2.885165x+0.056808      | 0.9978                                    | 160.0743  | 135.0682,104.0495,294.1353,161.0773,103.0416 |
| 316 | Triapenthenol          | C15H25N3O             | 18.415 | y=5.817410x+0.025404      | 0.9972                                    | 206.1288  | 70.0400,124.0505,91.0542,207.1335,67.0542    |
| 317 | Tribufos               | C12H27OPS3            | 22.455 | y=1.597447x+3.307548E-004 | 0.9979                                    | 168.9905  | 56.0620,57.0699,146.9156,112.9279,114.9436   |
| 318 | Trichloronat           | C10H12Cl3O2PS         | 19.478 | y=4.099580x+0.006649      | 0.9999                                    | 108.9872  | 268.9354,296.9667,270.9325,298.9638,80.9558  |
| 319 | Trietazine             | C9H16ClN5             | 15.098 | y=4.073755x+0.015940      | 0.9953                                    | 200.0697  | 186.0541,214.0854,229.1089,202.0669,68.0243  |
| 320 | Trifloxystrobin        | C20H19F3N2O4          | 25.47  | y=3.740790x-0.045063      | 0.9986                                    | 116.0495  | 172.0369,145.0260,187.0603,131.0730,103.0428 |
| 321 | Triflumizole           | C15H15ClF3N3O         | 21.048 | y=0.926031x+0.007677      | 0.9927                                    | 205.9979  | 278.0554,178.9881,287.0432,185.9917,68.0369  |
| 322 | Trifluralin            | C13H16F3N3O4          | 13.218 | y=2.549009x+0.003376      | 0.9993                                    | 264.0227  | 306.0696,248.0278,206.0298,290.0747,265.0254 |
| 323 | Tri-Isobutyl Phosphate | C12H27O4P             | 10.148 | y=23.336699x-0.260239     | 0.9934                                    | 98.9842   | 139.0155,112.9998,81.9814,80.9736,111.9920   |
| 324 | Triticonazole          | C17H20ClN3O           | 28.159 | y=4.837751x+0.038857      | 0.9839                                    | 235.0884  | 217.0779,215.0622,182.1090,299.1184,237.0858 |
| 325 | Uniconazole            | C15H18ClN3O           | 22.384 | y=2.738779x+0.010141      | 0.9959                                    | 234.0429  | 70.0400,236.0402,235.0457,165.0102,131.0491  |
| 326 | Vernolate              | C10H21NOS             | 9.076  | y=2.832197x-0.013398      | 0.9996                                    | 128.1070  | 86.0600,146.0998,161.0869,70.0651,72.0808    |
| 327 | Zoxamide               | C14H16Cl3NO2          | 20.795 | y=1.394086x-7.320401E-004 | 0.9979                                    | 186.9712  | 242.0134,188.9683,244.0106,185.9872,187.9893 |

**Supplemental Table 3** Recovery and precision data for 482 pesticide residues in Radix Codonopsis using automated QuEChERS procedure (n=5)

| No. | Pesticides                                   | GC-Q-TOF/MS |       |          |       |           |       | LC-Q-TOF/MS |       |          |       |           |      |
|-----|----------------------------------------------|-------------|-------|----------|-------|-----------|-------|-------------|-------|----------|-------|-----------|------|
|     |                                              | 10 µg/kg    |       | 20 µg/kg |       | 100 µg/kg |       | 10 µg/kg    |       | 20 µg/kg |       | 100 µg/kg |      |
|     |                                              | REC%        | RSD%  | REC%     | RSD%  | REC%      | RSD%  | REC%        | RSD%  | REC%     | RSD%  | REC%      | RSD% |
| 1   | 1,4-Dimethylnaphthalene                      |             |       |          |       |           |       | 91.16       | 6.35  | 90.46    | 10.88 | 92.66     | 7.24 |
| 2   | 1-Naphthyl Acetamide                         |             |       | 94.38    | 9.49  | 93.99     | 3.53  |             |       |          |       |           |      |
| 3   | 2,3,4,5-Tetrachloroaniline                   |             |       |          |       |           |       | 84.65       | 6.21  | 82.75    | 4.86  | 79.74     | 4.86 |
| 4   | 2,4'-DDT                                     |             |       |          |       |           |       | 90.65       | 4.34  | 95.48    | 4.68  | 85.88     | 3.71 |
| 5   | 2,4-D-ethylhexyl                             |             |       |          |       |           |       | 92.27       | 1.95  | 95.27    | 3.00  | 88.73     | 4.95 |
| 6   | 2,4'-Dicofol                                 |             |       |          |       |           |       | 93.40       | 5.77  | 93.60    | 3.86  | 93.27     | 3.63 |
| 7   | 2,6-Dichlorobenzamide                        | 83.87       | 26.11 | 113.26   | 4.81  | 98.80     | 8.77  |             |       |          |       |           |      |
| 8   | 3,4,5-Trimethacarb                           | 108.13      | 19.09 | 91.80    | 9.63  | 97.76     | 8.38  |             |       |          |       |           |      |
| 9   | 4,4'-DDD                                     |             |       |          |       |           |       | 85.20       | 5.20  | 99.76    | 4.43  | 93.38     | 5.20 |
| 10  | 4,4'-DDE                                     |             |       |          |       |           |       | 95.28       | 3.67  | 86.82    | 4.40  | 94.23     | 6.14 |
| 11  | 4-Bromo-3,5-Dimethylphenyl-N-Methylcarbamate |             |       |          |       |           |       | 101.59      | 6.27  | 96.48    | 5.04  | 92.14     | 2.79 |
| 12  | 4'-Chloro-2,2,2-trifluoroacetophenone        |             |       |          |       |           |       |             |       |          |       | 91.82     | 7.02 |
| 13  | 6-Isopentenyl aminopurine                    |             |       |          |       |           |       | 79.80       | 11.27 | 70.47    | 43.30 | 87.00     | 8.36 |
| 14  | Acibenzolar-S-methyl                         | 19.35       | 16.68 | 19.35    | 11.10 | 22.38     | 10.91 |             |       |          |       |           |      |
| 15  | Akton                                        |             |       |          |       |           |       | 82.36       | 8.10  | 91.41    | 2.43  | 94.24     | 3.83 |
| 16  | Aldicarb-sulfone                             | 86.11       | 13.05 | 88.85    | 14.11 | 94.62     | 7.69  | 97.62       | 4.04  | 101.36   | 4.44  | 98.09     | 5.44 |
| 17  | Aldicarb-sulfoxide                           | 92.27       | 9.65  | 105.12   | 10.13 | 89.63     | 7.24  | 91.24       | 14.34 | 87.08    | 14.50 | 95.69     | 3.57 |
| 18  | Aldrin                                       |             |       |          |       | 73.10     | 17.54 |             |       |          |       |           |      |
| 19  | Allidochlor                                  |             |       |          |       |           |       | 78.45       | 10.91 | 87.70    | 8.88  | 82.13     | 6.67 |
| 20  | alpha-Endosulfan                             | 119.10      | 3.33  | 89.01    | 15.51 | 94.55     | 7.11  |             |       |          |       |           |      |
| 21  | alpha-HCH                                    |             |       |          |       |           |       | 105.64      | 6.12  | 96.11    | 5.62  | 91.07     | 8.63 |
| 22  | Ametryn                                      |             |       |          |       |           |       | 89.58       | 2.81  | 93.71    | 3.47  | 93.68     | 3.44 |
| 23  | Amidosulfuron                                | 99.62       | 1.09  | 95.09    | 1.78  | 91.84     | 4.98  |             |       |          |       |           |      |
| 24  | Aminocarb                                    | 50.30       | 6.36  | 54.85    | 10.20 | 47.60     | 7.78  |             |       |          |       | 55.91     | 4.33 |
| 25  | Ancymidol                                    | 86.42       | 4.65  | 92.96    | 5.50  | 90.15     | 9.48  |             |       |          |       |           |      |
| 26  | Anilofos                                     | 98.35       | 5.69  | 91.44    | 2.92  | 93.79     | 5.67  |             |       |          |       |           |      |
| 27  | Anthraquinone                                | 105.63      | 1.92  | 100.60   | 2.05  | 103.30    | 5.25  |             |       |          |       |           |      |

| No. | Pesticides            | GC-Q-TOF/MS |       |          |       |           |       | LC-Q-TOF/MS |       |          |      |           |      |
|-----|-----------------------|-------------|-------|----------|-------|-----------|-------|-------------|-------|----------|------|-----------|------|
|     |                       | 10 µg/kg    |       | 20 µg/kg |       | 100 µg/kg |       | 10 µg/kg    |       | 20 µg/kg |      | 100 µg/kg |      |
|     |                       | REC%        | RSD%  | REC%     | RSD%  | REC%      | RSD%  | REC%        | RSD%  | REC%     | RSD% | REC%      | RSD% |
| 28  | Aramite               |             |       |          |       |           |       | 86.53       | 3.36  | 75.89    | 8.33 | 57.37     | 4.76 |
| 29  | Aspon                 |             |       |          |       | 65.09     | 17.55 |             |       |          |      |           |      |
| 30  | Atraton               |             |       |          |       |           |       | 99.20       | 4.67  | 99.43    | 3.47 | 94.77     | 4.99 |
| 31  | Atrazine-desethyl     | 99.58       | 1.08  | 91.52    | 2.24  | 89.09     | 4.13  |             |       |          |      |           |      |
| 32  | Atrazine-desisopropyl | 141.63      | 24.83 | 96.93    | 8.32  | 66.73     | 8.23  |             |       |          |      |           |      |
| 33  | Azaconazole           | 100.76      | 16.62 | 70.88    | 9.87  | 83.96     | 5.36  |             |       |          |      |           |      |
| 34  | azadirachtin          | 89.56       | 22.02 | 87.32    | 8.81  | 91.31     | 5.32  |             |       |          |      |           |      |
| 35  | Azimsulfuron          | 107.59      | 15.22 | 84.39    | 7.30  | 89.64     | 8.13  |             |       |          |      |           |      |
| 36  | Aziprotryne           | 73.99       | 4.44  | 68.81    | 5.69  | 61.65     | 5.95  |             |       |          |      |           |      |
| 37  | Beflubutamid          | 110.12      | 10.37 | 111.28   | 7.22  | 96.08     | 4.52  |             |       |          |      |           |      |
| 38  | Benalaxyl             | 107.48      | 4.30  | 106.18   | 2.56  | 122.52    | 11.63 |             |       |          |      |           |      |
| 39  | Benazolin-ethyl       | 102.75      | 0.58  | 102.36   | 2.37  | 102.56    | 5.22  |             |       |          |      |           |      |
| 40  | Bendiocarb            |             |       |          |       |           |       | 100.07      | 2.47  | 101.28   | 3.26 | 92.40     | 5.13 |
| 41  | Benodanil             | 77.90       | 10.89 | 107.76   | 15.00 | 104.39    | 5.91  |             |       |          |      |           |      |
| 42  | Benoxacor             | 107.11      | 0.72  | 103.51   | 2.35  | 102.84    | 3.35  |             |       |          |      |           |      |
| 43  | Bensulide             |             |       |          |       | 78.45     | 5.41  |             |       |          |      |           |      |
| 44  | Benzobicyclon         | 113.18      | 7.04  | 110.76   | 1.74  | 104.34    | 9.05  |             |       |          |      |           |      |
| 45  | Benzovindiflupyr      | 97.96       | 3.15  | 93.63    | 3.01  | 88.68     | 5.88  |             |       |          |      |           |      |
| 46  | Benzoximate           | 101.73      | 1.40  | 99.31    | 2.16  | 107.44    | 11.71 |             |       |          |      | 94.08     | 9.76 |
| 47  | Benzoylprop           |             |       |          |       |           |       | 77.68       | 4.97  | 89.05    | 8.57 | 99.94     | 5.06 |
| 48  | Benzoylprop-Ethyl     |             |       | 21.74    | 8.39  | 28.29     | 12.50 |             |       |          |      |           |      |
| 49  | beta-Endosulfan       | 108.70      | 3.44  | 101.71   | 2.24  | 102.25    | 7.43  |             |       |          |      |           |      |
| 50  | beta-HCH              |             |       |          |       |           |       | 83.51       | 11.08 | 103.89   | 6.46 | 95.42     | 3.44 |
| 51  | Bitertanol            |             |       |          |       |           |       | 75.97       | 6.88  | 77.62    | 5.74 | 73.68     | 2.63 |
| 52  | Bixafen               | 101.22      | 2.73  | 98.44    | 3.54  | 97.75     | 3.62  |             |       |          |      |           |      |
| 53  | Boscalid              |             |       |          |       |           |       |             |       |          |      | 101.62    | 5.77 |
| 54  | Brodifacoum           | 99.83       | 2.80  | 97.90    | 3.15  | 98.14     | 5.14  |             |       |          |      |           |      |
| 55  | Bromacil              | 46.25       | 11.25 | 36.55    | 8.81  | 39.73     | 9.42  |             |       |          |      |           |      |

| No. | Pesticides             | GC-Q-TOF/MS |       |          |       |           |       | LC-Q-TOF/MS |       |          |      |           |      |
|-----|------------------------|-------------|-------|----------|-------|-----------|-------|-------------|-------|----------|------|-----------|------|
|     |                        | 10 µg/kg    |       | 20 µg/kg |       | 100 µg/kg |       | 10 µg/kg    |       | 20 µg/kg |      | 100 µg/kg |      |
|     |                        | REC%        | RSD%  | REC%     | RSD%  | REC%      | RSD%  | REC%        | RSD%  | REC%     | RSD% | REC%      | RSD% |
| 56  | Bromadiolon            | 159.85      | 14.93 | 81.03    | 9.27  | 72.35     | 5.62  |             |       |          |      |           |      |
| 57  | Bromfenvinfos-Methyl   |             |       |          |       | 41.74     | 8.77  |             |       |          |      |           |      |
| 58  | Bromobutide            | 99.32       | 4.39  | 107.96   | 4.73  | 102.09    | 7.34  | 111.13      | 14.87 | 99.85    | 5.40 | 96.82     | 7.39 |
| 59  | Bromophos-Methyl       | 101.66      | 2.57  | 100.15   | 2.51  | 100.89    | 4.01  |             |       |          |      |           |      |
| 60  | Bromuconazole          |             |       |          |       |           |       | 98.34       | 6.92  | 99.86    | 5.33 | 89.36     | 3.66 |
| 61  | Bupirimate             | 104.87      | 8.62  | 91.69    | 8.81  | 96.05     | 6.14  |             |       |          |      |           |      |
| 62  | Butafenacil            | 98.48       | 0.71  | 97.97    | 2.95  | 97.11     | 5.24  |             |       |          |      |           |      |
| 63  | Butamifos              | 106.92      | 1.52  | 105.13   | 2.03  | 101.23    | 8.83  |             |       |          |      |           |      |
| 64  | Butocarboxim-Sulfoxide | 104.84      | 4.56  | 103.56   | 3.16  | 104.86    | 3.85  | 88.88       | 8.09  | 106.71   | 3.52 | 107.32    | 8.27 |
| 65  | Butylate               | 93.82       | 13.25 | 64.66    | 17.74 | 98.78     | 8.51  |             |       |          |      |           |      |
| 66  | Cadusafos              |             |       |          |       |           |       | 85.24       | 5.00  | 92.80    | 6.93 | 89.52     | 3.57 |
| 67  | Cafenstrole            | 100.69      | 3.46  | 92.84    | 3.58  | 96.88     | 5.51  | 94.00       | 5.75  | 95.40    | 4.25 | 93.63     | 4.65 |
| 68  | Carbofuran             | 105.30      | 7.57  | 101.47   | 6.70  | 101.85    | 6.88  |             |       |          |      |           |      |
| 69  | Carbofuran-3-Hydroxy   | 100.51      | 13.13 | 78.48    | 11.65 | 97.76     | 3.36  |             |       |          |      | 103.21    | 5.19 |
| 70  | Carboxin               |             |       |          |       | 93.94     | 5.68  |             |       |          |      |           |      |
| 71  | Carfentrazone-ethyl    | 92.06       | 4.98  | 74.16    | 3.70  | 91.77     | 8.69  |             |       |          |      |           |      |
| 72  | Carpropamid            | 110.21      | 3.20  | 100.52   | 2.36  | 140.59    | 15.17 | 97.79       | 2.77  | 97.25    | 2.44 | 92.16     | 6.13 |
| 73  | Chlorbenzuron          | 103.15      | 3.23  | 90.09    | 4.05  | 96.96     | 5.40  |             |       |          |      |           |      |
| 74  | Chlorbufam             | 83.14       | 7.29  | 74.69    | 9.53  | 71.40     | 6.98  | 81.82       | 8.43  | 86.10    | 4.99 | 74.54     | 4.93 |
| 75  | Chlordimeform          |             |       |          |       |           |       |             |       |          |      | 105.00    | 8.52 |
| 76  | Chlorethoxyfos         |             |       | 87.45    | 14.83 | 71.71     | 11.72 |             |       |          |      | 93.21     | 1.90 |
| 77  | Chlorfenethol          |             |       |          |       |           |       | 88.44       | 5.65  | 88.49    | 4.79 | 93.03     | 3.43 |
| 78  | Chlorfenvinphos        |             |       |          |       |           |       | 100.18      | 4.25  | 95.09    | 2.68 | 90.47     | 4.12 |
| 79  | Chloridazon            | 103.44      | 6.70  | 101.86   | 4.99  | 98.41     | 4.86  |             |       |          |      |           |      |
| 80  | Chlorimuron-ethyl      | 117.76      | 8.67  | 85.72    | 6.98  | 70.75     | 7.71  |             |       |          |      |           |      |
| 81  | Chlormepfos            | 83.72       | 3.09  | 83.47    | 5.25  | 72.00     | 7.48  |             |       |          |      |           |      |
| 82  | Chlorphonium           |             |       |          |       |           |       | 95.78       | 5.17  | 94.75    | 6.61 | 97.96     | 4.37 |
| 83  | Chlorphoxim            | 33.97       | 6.82  | 37.08    | 12.24 | 42.78     | 13.75 |             |       |          |      |           |      |

| No. | Pesticides           | GC-Q-TOF/MS |       |          |       |           |       | LC-Q-TOF/MS |       |          |      |           |       |
|-----|----------------------|-------------|-------|----------|-------|-----------|-------|-------------|-------|----------|------|-----------|-------|
|     |                      | 10 µg/kg    |       | 20 µg/kg |       | 100 µg/kg |       | 10 µg/kg    |       | 20 µg/kg |      | 100 µg/kg |       |
|     |                      | REC%        | RSD%  | REC%     | RSD%  | REC%      | RSD%  | REC%        | RSD%  | REC%     | RSD% | REC%      | RSD%  |
| 84  | Chlorpropham         | 111.93      | 8.02  | 95.26    | 7.23  | 99.01     | 7.17  |             |       |          |      |           |       |
| 85  | Chlorsulfuron        |             |       |          |       |           |       | 93.25       | 7.95  | 95.70    | 2.04 | 94.67     | 5.20  |
| 86  | Chlorthion           | 77.49       | 2.51  | 75.92    | 8.81  | 71.59     | 7.35  |             |       |          |      | 64.22     | 9.15  |
| 87  | Chlorthiophos        |             |       |          |       |           |       | 92.73       | 11.58 | 97.40    | 6.66 | 88.63     | 5.55  |
| 88  | Cinidon-Ethyl        |             |       |          |       |           |       | 90.21       | 6.91  | 93.62    | 6.54 | 86.31     | 3.89  |
| 89  | cis-Diallate         |             |       |          |       | 27.00     | 37.65 |             |       |          |      | 107.17    | 9.24  |
| 90  | Clodinafop           |             |       |          |       |           |       | 94.71       | 11.27 | 102.48   | 1.61 | 92.20     | 4.64  |
| 91  | Clodinafop-propargyl |             |       |          |       | 15.71     | 25.60 |             |       |          |      |           |       |
| 92  | Clofencet            | 98.71       | 2.99  | 98.39    | 3.32  | 94.90     | 9.21  | 97.71       | 2.38  | 101.21   | 2.38 | 92.98     | 6.87  |
| 93  | Clomazone            | 24.16       | 19.03 | 23.80    | 9.49  | 17.21     | 13.83 |             |       |          |      |           |       |
| 94  | Clomeprop            | 97.32       | 1.54  | 104.11   | 2.99  | 102.06    | 4.06  |             |       |          |      |           |       |
| 95  | Cloransulam-Methyl   | 74.26       | 8.69  | 84.88    | 6.49  | 81.53     | 7.69  |             |       |          |      |           |       |
| 96  | Coumaphos            | 76.24       | 2.13  | 86.43    | 7.77  | 80.83     | 5.95  |             |       |          |      |           |       |
| 97  | coumaphos-oxon       | 93.77       | 1.94  | 80.66    | 6.30  | 86.75     | 6.83  |             |       |          |      | 58.96     | 12.63 |
| 98  | Crimidine            | 99.87       | 2.95  | 94.74    | 4.88  | 92.58     | 3.62  |             |       |          |      |           |       |
| 99  | Crufomate            |             |       |          |       |           |       | 104.18      | 5.19  | 98.91    | 2.94 | 94.94     | 3.34  |
| 100 | Cyanazine            | 102.44      | 1.02  | 100.30   | 2.30  | 100.74    | 6.24  | 102.28      | 9.37  | 95.89    | 5.02 | 100.75    | 6.98  |
| 101 | Cyazofamid           | 101.21      | 3.12  | 95.14    | 1.99  | 97.85     | 6.20  |             |       |          |      |           |       |
| 102 | Cycloate             | 111.56      | 6.12  | 107.85   | 3.29  | 123.47    | 12.93 |             |       |          |      |           |       |
| 103 | Cycluron             | 108.69      | 9.87  | 99.02    | 6.40  | 101.61    | 5.49  |             |       |          |      |           |       |
| 104 | Cyenopyrafen         | 97.39       | 1.16  | 93.05    | 1.80  | 92.03     | 5.27  |             |       |          |      |           |       |
| 105 | Cyflufenamid         | 104.92      | 2.74  | 96.34    | 3.26  | 80.31     | 8.57  | 109.59      | 8.64  | 106.81   | 2.18 | 83.42     | 7.16  |
| 106 | Cyhalofop-Butyl      | 105.55      | 3.34  | 102.58   | 3.73  | 106.15    | 4.24  |             |       |          |      |           |       |
| 107 | Cymiazole            |             |       |          |       |           |       | 88.84       | 3.20  | 97.63    | 3.42 | 91.12     | 2.69  |
| 108 | Cymoxanil            | 110.11      | 4.23  | 97.05    | 5.26  | 58.15     | 9.17  | 90.33       | 12.73 | 78.77    | 9.63 | 77.14     | 5.41  |
| 109 | Cyprazine            | 94.47       | 23.69 | 86.34    | 15.12 | 126.33    | 22.43 |             |       |          |      |           |       |
| 110 | Cyproconazole        | 106.36      | 2.71  | 97.92    | 2.41  | 96.45     | 4.91  |             |       |          |      |           |       |
| 111 | Cyprofuram           | 98.52       | 2.53  | 96.33    | 3.19  | 96.48     | 5.37  |             |       |          |      |           |       |

| No. | Pesticides                   | GC-Q-TOF/MS |       |          |       |           |       | LC-Q-TOF/MS |       |          |      |           |      |
|-----|------------------------------|-------------|-------|----------|-------|-----------|-------|-------------|-------|----------|------|-----------|------|
|     |                              | 10 µg/kg    |       | 20 µg/kg |       | 100 µg/kg |       | 10 µg/kg    |       | 20 µg/kg |      | 100 µg/kg |      |
|     |                              | REC%        | RSD%  | REC%     | RSD%  | REC%      | RSD%  | REC%        | RSD%  | REC%     | RSD% | REC%      | RSD% |
| 112 | Cyromazine                   | 111.95      | 2.36  | 103.55   | 3.89  | 96.98     | 6.11  |             |       |          |      |           |      |
| 113 | Daimuron                     | 54.05       | 26.92 | 57.77    | 24.30 | 24.30     | 10.32 |             |       |          |      |           |      |
| 114 | DDT                          | 103.42      | 2.02  | 102.98   | 2.80  | 101.66    | 6.11  |             |       |          |      |           |      |
| 115 | delta-HCH                    |             |       |          |       |           |       | 102.72      | 6.38  | 91.07    | 5.74 | 81.78     | 6.62 |
| 116 | Demeton-O                    |             |       |          |       |           |       | 97.53       | 3.53  | 98.11    | 4.67 | 91.65     | 7.64 |
| 117 | Demeton-S                    |             |       |          |       |           |       | 71.24       | 8.38  | 76.83    | 7.03 | 65.83     | 7.87 |
| 118 | Desethylterbutylazine        |             |       |          |       |           |       | 76.29       | 9.42  | 75.53    | 6.04 | 68.29     | 7.41 |
| 119 | Desmetryn                    |             |       |          |       |           |       | 92.68       | 3.34  | 93.05    | 3.56 | 94.95     | 4.80 |
| 120 | Diallate                     | 98.00       | 0.73  | 88.28    | 2.37  | 87.48     | 6.08  | 94.52       | 5.88  | 97.31    | 6.23 | 89.26     | 4.01 |
| 121 | Diazinon                     | 110.62      | 14.19 | 84.97    | 6.47  | 106.14    | 6.01  |             |       |          |      |           |      |
| 122 | Dibutyl succinate            | 102.44      | 1.18  | 99.95    | 1.71  | 100.25    | 6.24  |             |       |          |      |           |      |
| 123 | Dichlormid                   | 72.27       | 31.89 | 67.41    | 49.01 | 82.50     | 25.66 |             |       |          |      |           |      |
| 124 | Diclobutrazol                | 111.28      | 17.39 | 78.29    | 8.70  | 98.84     | 10.20 |             |       |          |      |           |      |
| 125 | Diclocymet                   | 109.15      | 3.31  | 95.89    | 1.72  | 99.31     | 4.68  |             |       |          |      |           |      |
| 126 | Diclosulam                   | 130.87      | 53.17 | 98.90    | 27.54 | 100.41    | 8.91  |             |       |          |      |           |      |
| 127 | Dicofol                      | 80.29       | 7.83  | 76.81    | 7.11  | 62.09     | 11.27 |             |       |          |      |           |      |
| 128 | Dieldrin                     |             |       |          |       |           |       | 111.85      | 5.72  | 98.01    | 7.31 | 100.18    | 4.30 |
| 129 | Diethyl-Ethyl                |             |       |          |       |           |       | 83.08       | 26.38 | 98.52    | 5.41 | 96.43     | 7.20 |
| 130 | Diethyl Aminoethyl Hexanoate | 23.57       | 10.07 | 20.11    | 6.46  | 21.86     | 8.06  |             |       |          |      |           |      |
| 131 | Diethyltoluamide             | 105.06      | 2.95  | 97.50    | 2.67  | 97.59     | 4.68  |             |       |          |      |           |      |
| 132 | Difenacoum                   | 73.56       | 2.64  | 64.82    | 7.38  | 67.85     | 9.20  |             |       |          |      |           |      |
| 133 | Difenoconazole               | 98.79       | 1.24  | 87.45    | 2.91  | 88.60     | 5.55  |             |       |          |      | 86.35     | 5.59 |
| 134 | Difenoxuron                  | 102.72      | 0.89  | 96.24    | 2.04  | 93.96     | 7.56  |             |       |          |      |           |      |
| 135 | Diflufenican                 | 103.66      | 11.92 | 94.46    | 8.07  | 83.15     | 4.44  | 96.45       | 6.27  | 88.97    | 3.48 | 81.76     | 3.59 |
| 136 | Dimepiperate                 |             |       |          |       |           |       | 84.79       | 7.32  | 87.88    | 4.12 | 97.41     | 5.55 |
| 137 | Dimethachlon                 |             |       |          |       |           |       | 106.35      | 4.83  | 98.01    | 2.97 | 99.05     | 7.20 |
| 138 | Dimethachlor                 | 98.39       | 3.33  | 106.27   | 2.35  | 100.06    | 5.32  | 99.89       | 4.93  | 98.59    | 2.41 | 94.11     | 4.59 |
| 139 | Dimethametryn                | 98.99       | 1.53  | 97.86    | 2.23  | 96.90     | 6.17  | 91.58       | 6.90  | 100.17   | 2.81 | 90.84     | 6.16 |

| No. | Pesticides                 | GC-Q-TOF/MS |       |          |       |           |       | LC-Q-TOF/MS |       |          |       |           |       |
|-----|----------------------------|-------------|-------|----------|-------|-----------|-------|-------------|-------|----------|-------|-----------|-------|
|     |                            | 10 µg/kg    |       | 20 µg/kg |       | 100 µg/kg |       | 10 µg/kg    |       | 20 µg/kg |       | 100 µg/kg |       |
|     |                            | REC%        | RSD%  | REC%     | RSD%  | REC%      | RSD%  | REC%        | RSD%  | REC%     | RSD%  | REC%      | RSD%  |
| 140 | Dimethenamid               | 109.12      | 2.39  | 100.23   | 4.15  | 100.24    | 5.20  | 100.65      | 2.72  | 97.56    | 3.57  | 90.32     | 4.15  |
| 141 | Dimethomorph               | 100.82      | 1.98  | 103.97   | 4.54  | 97.43     | 5.21  |             |       |          |       | 87.32     | 6.37  |
| 142 | Dimethylvinphos (E)        | 109.20      | 5.48  | 93.31    | 4.15  | 105.46    | 6.74  | 99.08       | 9.64  | 95.97    | 4.93  | 98.07     | 4.45  |
| 143 | Dimethylvinphos (Z)        | 101.90      | 3.06  | 105.90   | 4.42  | 106.09    | 6.72  |             |       |          |       |           |       |
| 144 | Dimetilan                  | 112.98      | 5.68  | 87.79    | 4.79  | 74.44     | 6.97  | 98.90       | 6.03  | 98.71    | 3.74  | 85.42     | 5.01  |
| 145 | Dinitramine                |             |       |          |       | 101.40    | 7.69  | 92.30       | 9.66  | 98.32    | 4.09  | 92.68     | 6.64  |
| 146 | Dioxabenzofos              | 132.26      | 5.23  | 98.99    | 7.08  | 99.70     | 5.43  | 94.41       | 3.76  | 92.65    | 3.89  | 95.33     | 3.51  |
| 147 | Dioxacarb                  |             |       |          |       |           |       |             |       |          |       | 101.28    | 5.52  |
| 148 | Dioxathion                 |             |       |          |       | 98.99     | 7.36  | 92.09       | 8.90  | 92.60    | 6.71  | 94.68     | 10.83 |
| 149 | Diphenamid                 | 97.99       | 1.18  | 103.76   | 2.28  | 102.24    | 5.73  | 96.43       | 5.45  | 97.36    | 4.07  | 98.03     | 3.32  |
| 150 | Dipropetryn                | 102.86      | 0.91  | 99.72    | 1.83  | 97.86     | 6.53  | 95.75       | 8.73  | 102.16   | 3.59  | 52.35     | 7.56  |
| 151 | Dipropyl Isocinchomeronate | 101.10      | 1.65  | 99.31    | 2.51  | 97.45     | 5.86  | 94.32       | 7.98  | 96.91    | 4.01  | 87.75     | 4.92  |
| 152 | Dithiopyr                  | 88.84       | 5.28  | 109.86   | 2.98  | 104.21    | 7.39  | 101.56      | 4.59  | 100.08   | 5.07  | 92.61     | 5.33  |
| 153 | DMST                       | 76.29       | 5.76  | 106.25   | 11.69 | 106.95    | 6.44  |             |       |          |       |           |       |
| 154 | Dodemorph                  | 33.27       | 12.08 | 40.53    | 12.61 | 40.80     | 24.99 | 46.01       | 12.41 | 48.64    | 10.76 | 40.47     | 9.55  |
| 155 | Drazoxolon                 | 42.44       | 12.47 | 32.05    | 18.15 | 16.43     | 7.37  |             |       |          |       |           |       |
| 156 | Endosulfan-sulfate         |             |       |          |       |           |       | 102.36      | 8.80  | 97.18    | 10.54 | 94.50     | 8.13  |
| 157 | Enestroburin               | 95.19       | 5.46  | 90.87    | 5.65  | 93.66     | 10.38 |             |       | 87.78    | 8.49  | 86.89     | 8.13  |
| 158 | EPN                        | 80.60       | 10.02 | 83.14    | 8.37  | 81.66     | 7.40  | 88.31       | 6.29  | 100.85   | 0.80  | 84.44     | 4.55  |
| 159 | Epoxiconazole              | 99.11       | 1.04  | 99.41    | 1.20  | 98.58     | 5.63  | 99.15       | 7.94  | 96.39    | 9.64  | 91.04     | 7.24  |
| 160 | Eprinomectin B1b           | 97.70       | 6.87  | 78.28    | 1.88  | 89.10     | 11.15 |             |       |          |       |           |       |
| 161 | EPTC                       |             |       |          |       |           |       | 95.11       | 5.65  | 88.95    | 16.62 | 91.16     | 6.32  |
| 162 | Esprocarb                  | 110.58      | 9.24  | 97.74    | 1.06  | 97.54     | 6.41  | 89.50       | 5.33  | 82.62    | 10.58 | 88.87     | 3.49  |
| 163 | Etaconazole                | 100.75      | 3.59  | 100.21   | 2.95  | 98.04     | 5.20  | 88.89       | 4.93  | 97.04    | 5.00  | 85.59     | 5.08  |
| 164 | Ethiofencarb               | 79.05       | 21.46 | 63.13    | 22.95 | 101.13    | 5.36  |             |       |          |       |           |       |
| 165 | Ethiofencarb-sulfone       | 122.41      | 8.64  | 80.84    | 15.44 | 81.89     | 8.13  |             |       |          |       |           |       |
| 166 | Ethiofencarb-sulfoxide     | 110.75      | 12.02 | 102.69   | 6.97  | 73.16     | 6.10  |             |       |          |       |           |       |
| 167 | Ethiolate                  |             |       |          |       |           |       | 87.32       | 7.30  | 70.75    | 28.31 | 84.68     | 9.12  |



| No. | Pesticides           | GC-Q-TOF/MS |       |          |       |           |       | LC-Q-TOF/MS |       |          |       |           |       |
|-----|----------------------|-------------|-------|----------|-------|-----------|-------|-------------|-------|----------|-------|-----------|-------|
|     |                      | 10 µg/kg    |       | 20 µg/kg |       | 100 µg/kg |       | 10 µg/kg    |       | 20 µg/kg |       | 100 µg/kg |       |
|     |                      | REC%        | RSD%  | REC%     | RSD%  | REC%      | RSD%  | REC%        | RSD%  | REC%     | RSD%  | REC%      | RSD%  |
| 168 | Ethofumesate         |             |       |          |       |           |       | 84.71       | 6.21  | 82.96    | 9.34  | 96.38     | 4.58  |
| 169 | Ethoprophos          | 102.14      | 1.46  | 99.86    | 2.17  | 100.88    | 5.45  | 100.92      | 3.62  | 104.55   | 2.22  | 94.48     | 5.10  |
| 170 | Ethoxyquin           | 90.83       | 2.93  | 85.60    | 3.14  | 98.43     | 8.59  | 80.56       | 9.69  | 84.28    | 5.55  | 65.53     | 6.07  |
| 171 | ethychlozate         | 104.37      | 3.28  | 93.65    | 4.09  | 95.76     | 6.81  | 91.66       | 8.67  | 97.35    | 7.38  | 91.27     | 4.93  |
| 172 | Etofenprox           |             |       |          |       | 98.19     | 8.74  | 96.75       | 6.33  | 80.26    | 2.93  | 79.50     | 3.90  |
| 173 | Etoxazole            | 101.82      | 0.93  | 97.24    | 1.90  | 100.34    | 8.89  | 89.97       | 4.32  | 93.73    | 1.39  | 91.51     | 6.41  |
| 174 | Etrimfos             | 105.26      | 0.91  | 96.47    | 1.90  | 98.50     | 5.56  |             |       |          |       |           |       |
| 175 | Eugenol              |             |       |          |       |           |       | 90.92       | 4.08  | 88.40    | 2.45  | 94.53     | 5.33  |
| 176 | Famphur              | 104.20      | 6.72  | 102.10   | 3.43  | 101.50    | 6.04  | 90.67       | 9.57  | 100.71   | 7.26  | 88.57     | 5.33  |
| 177 | Fenamidone           | 105.19      | 1.36  | 100.59   | 2.45  | 102.56    | 5.64  | 93.16       | 9.02  | 85.73    | 2.83  | 87.50     | 4.57  |
| 178 | Fenamiphos           | 97.86       | 2.89  | 91.70    | 3.38  | 97.13     | 6.88  | 85.22       | 13.77 | 95.93    | 3.66  | 90.94     | 5.27  |
| 179 | Fenamiphos-sulfone   | 108.28      | 2.28  | 95.67    | 2.69  | 97.36     | 5.34  |             |       |          |       | 95.65     | 6.75  |
| 180 | Fenamiphos-sulfoxide | 97.03       | 3.76  | 93.57    | 4.95  | 85.78     | 3.85  |             |       |          |       | 76.14     | 13.85 |
| 181 | Fenazaquin           | 71.55       | 2.42  | 65.45    | 4.52  | 56.24     | 21.23 | 79.99       | 3.03  | 77.89    | 3.90  | 63.57     | 5.40  |
| 182 | Fenchlorphos         |             |       |          |       |           |       | 50.64       | 3.22  | 37.30    | 4.78  | 43.67     | 6.87  |
| 183 | Fenchlorphos-Oxon    | 103.97      | 10.37 | 95.62    | 6.06  | 102.65    | 4.78  | 106.85      | 9.59  | 100.14   | 5.01  | 89.93     | 8.08  |
| 184 | Fenfuram             | 111.66      | 5.36  | 90.96    | 7.49  | 91.80     | 6.74  | 94.17       | 3.66  | 100.89   | 5.13  | 87.87     | 0.97  |
| 185 | Fenhexamid           | 83.88       | 47.43 | 93.33    | 2.01  | 95.55     | 5.48  |             |       |          |       | 93.42     | 6.82  |
| 186 | Fenoprop             |             |       |          |       |           |       | 83.91       | 29.36 | 72.21    | 4.65  | 130.72    | 23.78 |
| 187 | Fenothiocarb         | 99.85       | 3.36  | 99.31    | 2.10  | 100.54    | 5.05  | 100.88      | 5.94  | 96.92    | 4.90  | 92.17     | 6.52  |
| 188 | Fenoxaprop-Ethyl     | 100.19      | 3.45  | 94.14    | 3.26  | 95.56     | 2.80  | 89.02       | 6.46  | 97.52    | 2.05  | 90.60     | 4.74  |
| 189 | Fenoxaprop-P         | 9.34        | 16.75 | 14.27    | 10.45 | 17.56     | 23.51 |             |       |          |       |           |       |
| 190 | Fenoxasulfone        |             |       |          |       |           |       | 84.79       | 5.00  | 94.52    | 3.69  | 92.81     | 3.66  |
| 191 | Fenoxycarb           | 104.52      | 3.45  | 105.71   | 3.38  | 105.80    | 5.27  |             |       |          |       | 88.76     | 4.60  |
| 192 | Fenpropidin          | 25.58       | 7.16  | 28.27    | 10.68 | 32.45     | 15.85 | 25.84       | 43.06 | 26.35    | 13.64 | 21.76     | 9.97  |
| 193 | Fenpropimorph        |             |       |          |       |           |       | 71.19       | 9.53  | 68.88    | 3.57  | 60.03     | 6.46  |
| 194 | Fenpyrazamine        | 113.74      | 5.31  | 91.71    | 3.33  | 101.78    | 5.98  | 85.30       | 3.54  | 86.66    | 6.45  | 81.38     | 4.39  |
| 195 | Fensulfothion        |             |       |          |       |           |       | 94.52       | 15.74 | 93.12    | 6.87  | 84.23     | 6.79  |

| No. | Pesticides                 | GC-Q-TOF/MS |       |          |       |           |       | LC-Q-TOF/MS |       |          |       |           |       |
|-----|----------------------------|-------------|-------|----------|-------|-----------|-------|-------------|-------|----------|-------|-----------|-------|
|     |                            | 10 µg/kg    |       | 20 µg/kg |       | 100 µg/kg |       | 10 µg/kg    |       | 20 µg/kg |       | 100 µg/kg |       |
|     |                            | REC%        | RSD%  | REC%     | RSD%  | REC%      | RSD%  | REC%        | RSD%  | REC%     | RSD%  | REC%      | RSD%  |
| 196 | Fensulfothion-Oxon-Sulfone | 108.62      | 3.42  | 95.95    | 3.34  | 94.33     | 4.92  |             |       |          |       |           |       |
| 197 | Fensulfothion-sulfone      |             |       |          |       |           |       | 94.12       | 4.96  | 106.04   | 8.80  | 105.83    | 5.90  |
| 198 | fentin hydroxide           |             |       |          |       |           |       |             |       |          |       | 89.97     | 19.52 |
| 199 | Fentrazamide               | 98.33       | 12.08 | 103.81   | 11.32 | 94.68     | 6.93  |             |       |          |       |           |       |
| 200 | Fenuron                    | 94.98       | 13.92 | 101.49   | 7.99  | 77.99     | 9.29  |             |       |          |       |           |       |
| 201 | Ferimzone                  | 131.05      | 3.91  | 103.37   | 2.99  | 129.48    | 7.67  |             |       |          |       |           |       |
| 202 | Fipronil                   |             |       |          |       |           |       | 73.08       | 10.14 | 70.98    | 12.98 | 71.33     | 8.20  |
| 203 | Fipronil Desulfinyl        |             |       |          |       |           |       | 88.99       | 12.03 | 93.07    | 3.97  | 86.78     | 6.39  |
| 204 | Fipronil-sulfide           |             |       |          |       |           |       | 106.14      | 3.23  | 102.00   | 2.90  | 95.16     | 4.99  |
| 205 | Fipronil-sulfone           |             |       |          |       |           |       | 95.22       | 12.65 | 103.35   | 4.55  | 91.48     | 3.55  |
| 206 | Flamprop-isopropyl         | 103.13      | 1.66  | 102.10   | 2.37  | 100.23    | 8.27  | 95.14       | 4.27  | 97.51    | 5.02  | 75.53     | 5.56  |
| 207 | Flamprop-methyl            |             |       |          |       |           |       | 100.97      | 4.88  | 101.35   | 4.01  | 100.39    | 6.52  |
| 208 | Flonicamid                 |             |       |          |       | 83.21     | 15.57 |             |       |          |       | 84.10     | 5.62  |
| 209 | Florasulam                 | 65.66       | 5.11  | 63.63    | 4.63  | 77.68     | 7.19  |             |       |          |       |           |       |
| 210 | Fluacrypyrim               | 97.73       | 4.63  | 106.90   | 5.00  | 100.46    | 5.87  | 95.59       | 4.68  | 85.55    | 3.33  | 89.30     | 6.32  |
| 211 | Fluazifop                  | 25.50       | 4.67  | 26.28    | 13.22 | 25.73     | 16.28 |             |       |          |       |           |       |
| 212 | Fluazifop-butyl            | 106.76      | 2.24  | 98.86    | 2.38  | 92.31     | 7.22  | 95.76       | 5.97  | 101.32   | 3.99  | 95.55     | 6.00  |
| 213 | Fluazuron                  | 99.18       | 8.56  | 89.36    | 4.25  | 69.61     | 8.91  |             |       |          |       |           |       |
| 214 | Flubenzimine               | 14.07       | 30.42 | 18.18    | 7.75  | 3.69      | 31.15 |             |       |          |       |           |       |
| 215 | Flucarbazone               | 11.46       | 9.94  | 13.13    | 24.71 | 22.39     | 26.41 |             |       |          |       |           |       |
| 216 | Flucetosulfuron            | 70.13       | 3.56  | 76.98    | 4.89  | 58.98     | 7.22  |             |       |          |       |           |       |
| 217 | Flucycloxuron              | 52.76       | 8.91  | 46.15    | 6.87  | 51.53     | 6.55  |             |       |          |       |           |       |
| 218 | Fluensulfone               |             |       |          |       |           |       | 95.95       | 6.07  | 98.39    | 2.95  | 96.24     | 5.87  |
| 219 | Flufenacet                 | 104.67      | 2.24  | 105.07   | 3.68  | 108.01    | 4.99  | 102.18      | 6.29  | 89.36    | 4.66  | 99.79     | 5.75  |
| 220 | Flufenoxuron               | 107.86      | 14.87 | 87.12    | 20.76 | 103.39    | 6.36  | 81.20       | 13.65 | 101.62   | 8.30  | 92.25     | 7.61  |
| 221 | Flufenpyr-Ethyl            | 101.91      | 3.65  | 101.54   | 1.83  | 103.09    | 4.42  |             |       |          |       |           |       |
| 222 | Flufiprole                 | 114.59      | 10.11 | 93.61    | 15.02 | 96.58     | 8.90  | 100.60      | 8.96  | 92.16    | 9.57  | 106.31    | 8.17  |
| 223 | Flumetralin                |             |       |          |       | 100.00    | 28.51 | 77.97       | 15.38 | 99.52    | 12.20 | 90.08     | 5.54  |

| No. | Pesticides              | GC-Q-TOF/MS |       |          |       |           |       | LC-Q-TOF/MS |       |          |      |           |      |
|-----|-------------------------|-------------|-------|----------|-------|-----------|-------|-------------|-------|----------|------|-----------|------|
|     |                         | 10 µg/kg    |       | 20 µg/kg |       | 100 µg/kg |       | 10 µg/kg    |       | 20 µg/kg |      | 100 µg/kg |      |
|     |                         | REC%        | RSD%  | REC%     | RSD%  | REC%      | RSD%  | REC%        | RSD%  | REC%     | RSD% | REC%      | RSD% |
| 224 | Flumetsulam             | 77.46       | 6.87  | 73.18    | 2.54  | 64.44     | 6.17  |             |       |          |      |           |      |
| 225 | Flumiclorac-Pentyl      | 107.53      | 5.82  | 93.54    | 4.16  | 81.04     | 7.29  |             |       |          |      |           |      |
| 226 | Flumioxazin             |             |       |          |       | 87.25     | 8.00  |             |       |          |      | 101.32    | 8.47 |
| 227 | Fluopyram               | 102.54      | 2.05  | 102.07   | 1.94  | 101.31    | 5.11  | 94.44       | 3.05  | 96.35    | 4.10 | 96.71     | 4.01 |
| 228 | Fluoroglycofen-ethyl    |             |       | 93.68    | 9.62  | 90.24     | 19.15 |             |       |          |      |           |      |
| 229 | Fluotrimazole           |             |       |          |       |           |       | 98.49       | 5.63  | 89.82    | 4.42 | 83.40     | 5.60 |
| 230 | Fluquinconazole         | 99.98       | 8.15  | 98.82    | 4.04  | 101.11    | 6.71  | 87.99       | 3.61  | 101.64   | 4.29 | 94.15     | 2.24 |
| 231 | Flurochloridone         | 80.76       | 17.74 | 91.92    | 10.03 | 93.93     | 9.55  | 93.83       | 5.80  | 94.36    | 5.55 | 95.47     | 8.72 |
| 232 | fluroxypyr-meptyl       | 77.14       | 10.32 | 56.37    | 8.43  | 68.85     | 10.25 | 93.81       | 3.38  | 93.82    | 6.40 | 87.48     | 6.66 |
| 233 | Flurprimidol            | 82.69       | 55.00 | 99.44    | 3.06  | 100.65    | 5.78  | 99.73       | 4.98  | 100.15   | 1.79 | 92.74     | 4.96 |
| 234 | Flusilazole             | 101.47      | 6.23  | 99.71    | 4.67  | 101.54    | 5.89  | 100.60      | 4.55  | 95.63    | 2.20 | 96.34     | 6.11 |
| 235 | Flutolanil              | 108.05      | 1.70  | 102.82   | 1.08  | 103.78    | 5.63  | 93.36       | 4.97  | 103.24   | 5.25 | 101.53    | 5.88 |
| 236 | Flutriafol              | 104.23      | 5.17  | 94.96    | 1.58  | 100.39    | 5.34  | 89.13       | 11.65 | 99.32    | 1.94 | 92.18     | 7.18 |
| 237 | Fluxapyroxad            | 104.62      | 2.19  | 106.67   | 2.58  | 104.40    | 3.70  | 95.31       | 2.08  | 95.53    | 0.82 | 99.96     | 5.61 |
| 238 | Fonofos                 | 110.28      | 22.98 | 110.92   | 8.54  | 92.05     | 6.80  | 95.37       | 3.74  | 92.05    | 4.52 | 85.63     | 7.03 |
| 239 | Foramsulfuron           | 62.16       | 5.25  | 57.53    | 6.56  | 46.71     | 5.39  |             |       |          |      |           |      |
| 240 | Formetanate             | 81.90       | 52.70 | 146.60   | 23.73 | 21.18     | 16.67 |             |       |          |      |           |      |
| 241 | Fuberidazole            | 82.75       | 3.86  | 79.55    | 3.29  | 63.85     | 7.68  |             |       |          |      | 67.08     | 7.07 |
| 242 | Furalaxyl               | 104.39      | 1.34  | 101.86   | 2.35  | 100.40    | 5.21  | 29.31       | 11.46 | 31.45    | 9.55 | 35.58     | 5.51 |
| 243 | furametpyr              |             |       |          |       |           |       | 93.51       | 5.89  | 78.25    | 5.25 | 92.37     | 4.42 |
| 244 | Furathiocarb            | 103.14      | 2.40  | 98.30    | 2.74  | 80.70     | 9.93  | 98.37       | 4.04  | 96.48    | 2.36 | 84.19     | 5.29 |
| 245 | Furilazole              |             |       |          |       |           |       | 92.38       | 10.11 | 84.21    | 7.85 | 87.63     | 7.14 |
| 246 | Furmecyclox             | 93.72       | 3.80  | 85.93    | 3.06  | 68.09     | 7.82  | 77.15       | 8.54  | 77.24    | 7.57 | 46.15     | 4.98 |
| 247 | Griseofulvin            | 104.65      | 1.57  | 97.10    | 1.75  | 96.91     | 5.86  | 81.83       | 5.51  | 87.33    | 3.83 | 96.28     | 8.67 |
| 248 | Halofenozide            | 105.03      | 3.24  | 104.58   | 3.49  | 105.21    | 5.76  |             |       |          |      |           |      |
| 249 | Halosulfuron-methyl     | 57.18       | 3.25  | 56.38    | 10.81 | 54.55     | 10.85 |             |       |          |      |           |      |
| 250 | Haloxypop               |             |       | 18.01    | 21.42 | 14.66     | 31.82 | 96.76       | 6.28  | 95.34    | 5.75 | 94.06     | 6.27 |
| 251 | Haloxypop-2-ethoxyethyl | 109.27      | 4.06  | 98.70    | 2.17  | 102.34    | 5.31  | 100.53      | 1.22  | 97.62    | 0.97 | 92.25     | 5.32 |

| No. | Pesticides            | GC-Q-TOF/MS |       |          |       |           |       | LC-Q-TOF/MS |       |          |       |           |      |
|-----|-----------------------|-------------|-------|----------|-------|-----------|-------|-------------|-------|----------|-------|-----------|------|
|     |                       | 10 µg/kg    |       | 20 µg/kg |       | 100 µg/kg |       | 10 µg/kg    |       | 20 µg/kg |       | 100 µg/kg |      |
|     |                       | REC%        | RSD%  | REC%     | RSD%  | REC%      | RSD%  | REC%        | RSD%  | REC%     | RSD%  | REC%      | RSD% |
| 252 | Haloxypop-methyl      | 101.54      | 7.96  | 103.41   | 1.90  | 87.51     | 6.19  |             |       |          |       | 94.06     | 6.27 |
| 253 | Hexazinone            | 106.76      | 1.69  | 93.18    | 3.41  | 99.26     | 4.40  |             |       | 91.83    | 6.69  | 81.15     | 4.92 |
| 254 | Hydroprene            |             |       |          |       | 100.55    | 8.45  |             |       |          |       |           |      |
| 255 | Imazamethabenz-methyl | 104.56      | 1.57  | 95.30    | 1.94  | 93.78     | 5.76  | 84.21       | 10.53 | 80.49    | 7.18  | 90.47     | 6.81 |
| 256 | Imazosulfuron         | 55.88       | 4.38  | 63.22    | 8.97  | 57.89     | 8.71  |             |       |          |       |           |      |
| 257 | Imibenconazole        | 83.17       | 2.50  | 78.27    | 2.81  | 74.63     | 5.55  |             |       |          |       |           |      |
| 258 | Imicyafos             | 99.09       | 4.38  | 91.65    | 6.03  | 96.91     | 4.08  |             |       |          |       |           |      |
| 259 | Imidaclothiz          | 125.42      | 27.04 | 87.10    | 4.33  | 77.20     | 8.40  |             |       |          |       |           |      |
| 260 | Imiprothrin           | 107.78      | 5.33  | 97.22    | 3.34  | 96.53     | 4.75  |             |       |          |       |           |      |
| 261 | Inabenfide            | 56.41       | 3.36  | 54.33    | 4.36  | 60.69     | 6.80  |             |       |          |       |           |      |
| 262 | Indanofan             | 112.73      | 9.26  | 102.18   | 7.24  | 105.73    | 3.35  | 97.50       | 5.37  | 102.61   | 2.37  | 98.01     | 5.92 |
| 263 | Indaziflam            |             |       |          |       |           |       | 86.06       | 8.50  | 97.94    | 2.26  | 84.60     | 6.24 |
| 264 | Iodofenphos           |             |       |          |       |           |       | 87.51       | 26.07 | 99.82    | 6.99  | 90.92     | 5.33 |
| 265 | Iodosulfuron-methyl   | 43.37       | 6.75  | 50.53    | 11.29 | 49.25     | 9.61  |             |       |          |       |           |      |
| 266 | Ipconazole            | 99.82       | 5.25  | 96.52    | 4.84  | 106.68    | 7.07  |             |       | 91.09    | 16.92 | 90.62     | 4.48 |
| 267 | Ipfencarbazone        |             |       |          |       |           |       |             |       |          |       | 91.22     | 7.29 |
| 268 | Iprodione             |             |       |          |       | 101.00    | 9.68  | 103.56      | 7.35  | 89.23    | 10.12 | 89.48     | 5.40 |
| 269 | Isazofos              | 105.24      | 0.75  | 104.32   | 2.97  | 99.89     | 5.55  | 95.65       | 7.31  | 97.11    | 2.89  | 93.90     | 3.97 |
| 270 | Isocarbamid           | 101.85      | 10.02 | 86.21    | 5.47  | 80.14     | 4.94  | 92.93       | 9.00  | 94.67    | 2.08  | 86.96     | 6.94 |
| 271 | isocarbophos          |             |       |          |       |           |       | 92.16       | 2.42  | 93.79    | 6.26  | 92.95     | 5.56 |
| 272 | Isofenphos-Methyl     |             |       |          |       | 88.97     | 3.80  | 98.18       | 3.96  | 98.39    | 2.82  | 97.42     | 4.60 |
| 273 | Isomethiozin          | 86.32       | 1.86  | 83.73    | 2.89  | 77.11     | 5.63  | 77.15       | 7.22  | 75.04    | 4.14  | 72.75     | 3.94 |
| 274 | Isoprocarb            | 96.74       | 10.19 | 94.27    | 15.28 | 87.78     | 8.27  | 86.63       | 7.33  | 96.34    | 5.73  | 92.34     | 4.82 |
| 275 | Isopropalin           | 135.84      | 12.28 | 87.08    | 7.34  | 73.91     | 11.15 | 93.83       | 7.54  | 100.29   | 5.18  | 90.10     | 3.87 |
| 276 | Isoprothiolane        | 105.53      | 1.76  | 105.43   | 2.64  | 102.79    | 5.37  | 92.60       | 8.21  | 102.21   | 4.24  | 98.37     | 6.86 |
| 277 | Isoproturon           | 105.45      | 1.03  | 96.91    | 1.86  | 97.35     | 4.73  |             |       |          |       |           |      |
| 278 | Isopyrazam            |             |       |          |       |           |       | 86.53       | 6.08  | 96.78    | 3.94  | 92.46     | 7.40 |
| 279 | Isoxadifen-ethyl      | 104.69      | 2.14  | 86.28    | 3.53  | 97.21     | 9.96  | 85.55       | 7.35  | 97.79    | 3.80  | 86.71     | 4.86 |

| No. | Pesticides              | GC-Q-TOF/MS |       |          |       |           |       | LC-Q-TOF/MS |       |          |      |           |       |
|-----|-------------------------|-------------|-------|----------|-------|-----------|-------|-------------|-------|----------|------|-----------|-------|
|     |                         | 10 µg/kg    |       | 20 µg/kg |       | 100 µg/kg |       | 10 µg/kg    |       | 20 µg/kg |      | 100 µg/kg |       |
|     |                         | REC%        | RSD%  | REC%     | RSD%  | REC%      | RSD%  | REC%        | RSD%  | REC%     | RSD% | REC%      | RSD%  |
| 280 | Isoxaflutole            |             |       |          |       | 87.50     | 6.86  | 91.32       | 7.56  | 83.71    | 9.77 | 75.96     | 6.26  |
| 281 | Karbutilate             | 103.90      | 1.70  | 100.56   | 2.04  | 97.29     | 5.57  |             |       |          |      |           |       |
| 282 | Lenacil                 |             |       |          |       |           |       |             |       |          |      | 77.68     | 1.79  |
| 283 | Lindane                 |             |       |          |       |           |       | 98.13       | 6.57  | 104.41   | 4.05 | 107.33    | 6.16  |
| 284 | Maleic hydrazide        | 142.52      | 3.00  | 97.87    | 3.76  | 119.38    | 7.16  |             |       |          |      |           |       |
| 285 | MCPA-2-ETHYLHEXYL ESTER |             |       |          |       |           |       | 100.20      | 2.72  | 86.38    | 5.38 | 88.48     | 4.38  |
| 286 | MCPA-isooctyl           |             |       |          |       |           |       | 99.44       | 8.73  | 92.49    | 5.48 | 88.96     | 4.80  |
| 287 | Mecarbam                |             |       |          |       |           |       | 114.01      | 8.27  | 100.42   | 2.98 | 100.69    | 5.70  |
| 288 | Mefenacet               | 100.42      | 0.83  | 99.67    | 2.50  | 97.84     | 6.04  | 82.88       | 9.11  | 87.56    | 7.40 | 88.10     | 6.07  |
| 289 | Mefenpyr-diethyl        | 106.29      | 0.83  | 106.09   | 1.78  | 99.63     | 5.36  | 104.46      | 6.78  | 96.03    | 2.08 | 94.39     | 4.75  |
| 290 | Mepanipyrim             | 66.19       | 21.06 | 66.04    | 9.29  | 64.06     | 9.10  | 80.01       | 6.19  | 96.49    | 7.22 | 58.32     | 4.41  |
| 291 | Mepronil                | 104.60      | 1.92  | 102.35   | 2.39  | 101.25    | 4.53  | 91.75       | 5.71  | 95.16    | 3.04 | 96.32     | 3.59  |
| 292 | Metaflumizone           | 61.78       | 9.13  | 69.43    | 14.58 | 55.80     | 12.12 |             |       |          |      |           |       |
| 293 | Metalaxyl               | 105.20      | 2.68  | 96.98    | 1.65  | 98.25     | 4.65  | 40.02       | 4.17  | 32.29    | 9.67 | 46.12     | 7.14  |
| 294 | Metamifop               | 91.87       | 1.88  | 88.65    | 3.11  | 87.33     | 5.36  |             |       |          |      |           |       |
| 295 | Metamitron              | 119.23      | 4.79  | 69.29    | 11.28 | 79.49     | 9.51  |             |       |          |      |           |       |
| 296 | Metazachlor             | 102.89      | 3.50  | 105.77   | 3.66  | 98.80     | 10.99 |             |       |          |      | 101.86    | 6.94  |
| 297 | Metconazole             | 100.96      | 3.63  | 90.31    | 8.47  | 92.65     | 4.02  | 97.53       | 11.46 | 97.78    | 3.89 | 87.54     | 4.14  |
| 298 | Methabenzthiazuron      | 94.70       | 4.92  | 76.40    | 5.56  | 74.95     | 4.54  |             |       |          |      | 92.13     | 4.53  |
| 299 | Methacrifos             |             |       |          |       |           |       | 109.17      | 2.81  | 94.24    | 5.74 | 94.29     | 4.62  |
| 300 | Methamidophos           | 94.10       | 7.41  | 77.92    | 7.34  | 65.83     | 9.99  | 93.71       | 8.90  | 89.35    | 5.42 | 86.45     | 8.67  |
| 301 | Methfuroxam             | 94.37       | 3.78  | 83.64    | 3.15  | 58.24     | 11.82 | 90.24       | 9.49  | 90.10    | 5.42 | 59.84     | 5.42  |
| 302 | Methoprotryne           | 97.57       | 1.52  | 95.01    | 2.72  | 92.94     | 6.11  | 86.62       | 3.50  | 103.31   | 2.42 | 90.64     | 3.75  |
| 303 | Metobromuron            | 102.32      | 3.12  | 104.87   | 3.97  | 97.18     | 4.65  |             |       |          |      | 99.57     | 11.28 |
| 304 | Metrafenone             |             |       |          |       |           |       | 77.77       | 4.57  | 97.71    | 4.13 | 89.95     | 4.34  |
| 305 | Metribuzin              | 136.73      | 5.21  | 109.85   | 4.66  | 96.68     | 6.15  | 103.98      | 4.06  | 102.54   | 2.42 | 114.84    | 4.79  |
| 306 | Metsulfuron-Methyl      | 79.67       | 4.93  | 74.36    | 5.55  | 70.79     | 8.13  |             |       |          |      |           |       |
| 307 | Mexacarbate             | 106.01      | 5.21  | 91.29    | 10.99 | 74.68     | 8.64  | 97.65       | 5.45  | 94.64    | 3.09 | 92.24     | 4.79  |

| No. | Pesticides            | GC-Q-TOF/MS |      |          |       |           |       | LC-Q-TOF/MS |       |          |       |           |       |
|-----|-----------------------|-------------|------|----------|-------|-----------|-------|-------------|-------|----------|-------|-----------|-------|
|     |                       | 10 µg/kg    |      | 20 µg/kg |       | 100 µg/kg |       | 10 µg/kg    |       | 20 µg/kg |       | 100 µg/kg |       |
|     |                       | REC%        | RSD% | REC%     | RSD%  | REC%      | RSD%  | REC%        | RSD%  | REC%     | RSD%  | REC%      | RSD%  |
| 308 | Molinate              | 94.91       | 7.24 | 98.85    | 8.38  | 102.83    | 7.53  | 98.61       | 4.47  | 101.64   | 2.36  | 88.67     | 1.55  |
| 309 | Monalide              | 106.59      | 3.18 | 101.06   | 2.60  | 103.46    | 3.90  | 93.81       | 3.43  | 100.08   | 0.74  | 96.25     | 4.57  |
| 310 | Monocrotophos         | 106.77      | 9.24 | 82.98    | 5.53  | 74.79     | 4.76  |             |       |          |       | 78.79     | 8.56  |
| 311 | Monolinuron           | 120.08      | 5.32 | 96.17    | 5.18  | 95.85     | 4.94  |             |       |          |       | 110.59    | 6.04  |
| 312 | Monuron               | 106.57      | 2.70 | 88.90    | 2.72  | 89.15     | 5.12  |             |       |          |       |           |       |
| 313 | Musk Ketone           |             |      |          |       |           |       | 95.20       | 7.09  | 98.93    | 6.84  | 96.60     | 3.96  |
| 314 | Musk Moskene          |             |      |          |       |           |       | 96.69       | 3.52  | 95.71    | 3.90  | 87.61     | 2.79  |
| 315 | Musk Tibetene         |             |      |          |       |           |       | 93.36       | 6.98  | 94.90    | 4.20  | 90.34     | 3.18  |
| 316 | Myclobutanil          | 97.29       | 3.71 | 100.55   | 2.97  | 102.66    | 5.09  | 91.91       | 1.24  | 94.26    | 2.96  | 100.10    | 8.55  |
| 317 | Naphthalophos         | 58.47       | 4.75 | 57.51    | 6.43  | 55.06     | 7.62  |             |       |          |       |           |       |
| 318 | Neburon               | 98.07       | 0.73 | 94.38    | 2.50  | 97.75     | 5.52  |             |       |          |       |           |       |
| 319 | Nitrapyrin            |             |      |          |       |           |       | 98.00       | 7.22  | 90.44    | 9.98  | 94.46     | 1.25  |
| 320 | Nitrofen              |             |      |          |       |           |       | 84.62       | 5.15  | 102.43   | 7.58  | 93.83     | 6.29  |
| 321 | Nitrothal-Isopropyl   |             |      |          |       |           |       | 95.76       | 10.44 | 96.79    | 5.00  | 88.91     | 6.31  |
| 322 | Norflurazon           | 104.05      | 1.29 | 96.39    | 2.33  | 95.56     | 5.98  | 96.62       | 7.38  | 104.26   | 4.03  | 95.49     | 7.54  |
| 323 | Noruron               | 94.89       | 9.03 | 112.11   | 9.68  | 96.84     | 15.72 |             |       |          |       | 92.12     | 7.05  |
| 324 | Novaluron             |             |      |          |       | 118.10    | 9.95  | 76.29       | 63.53 | 97.63    | 39.83 | 70.63     | 34.67 |
| 325 | Noviflumuron          |             |      |          |       |           |       | 84.78       | 5.43  | 96.36    | 3.74  | 87.95     | 6.29  |
| 326 | Nuarimol              | 98.25       | 7.75 | 103.82   | 12.17 | 94.21     | 10.33 | 98.77       | 9.55  | 94.02    | 11.55 | 92.20     | 3.59  |
| 327 | Octhilineone          |             |      |          |       |           |       | 19.40       | 20.08 | 14.94    | 15.83 | 10.14     | 7.63  |
| 328 | Ofurace               | 104.46      | 2.20 | 97.99    | 3.33  | 100.08    | 3.36  |             |       |          |       | 87.89     | 7.26  |
| 329 | Orbencarb             | 107.93      | 1.47 | 101.76   | 3.44  | 99.76     | 5.35  | 85.14       | 2.84  | 98.84    | 5.87  | 90.25     | 5.73  |
| 330 | Ortho-Dichlorobenzene |             |      |          |       |           |       | 91.28       | 11.64 | 76.63    | 28.47 | 108.23    | 8.30  |
| 331 | Orysastrobins         |             |      |          |       |           |       | 96.29       | 4.79  | 99.24    | 0.95  | 94.72     | 4.95  |
| 332 | Oxadiargyl            |             |      | 89.33    | 19.84 | 80.00     | 7.72  |             |       |          |       |           |       |
| 333 | oxadiazon             |             |      | 82.48    | 16.63 | 80.66     | 14.74 | 97.98       | 2.91  | 98.64    | 2.97  | 95.58     | 6.18  |
| 334 | Oxadixyl              | 106.21      | 1.65 | 99.47    | 3.07  | 94.63     | 5.62  |             |       |          |       | 80.80     | 12.93 |
| 335 | Oxasulfuron           | 89.27       | 3.75 | 82.94    | 1.72  | 67.35     | 6.53  |             |       |          |       |           |       |

| No. | Pesticides                        | GC-Q-TOF/MS |       |          |       |           |       | LC-Q-TOF/MS |       |          |       |           |      |
|-----|-----------------------------------|-------------|-------|----------|-------|-----------|-------|-------------|-------|----------|-------|-----------|------|
|     |                                   | 10 µg/kg    |       | 20 µg/kg |       | 100 µg/kg |       | 10 µg/kg    |       | 20 µg/kg |       | 100 µg/kg |      |
|     |                                   | REC%        | RSD%  | REC%     | RSD%  | REC%      | RSD%  | REC%        | RSD%  | REC%     | RSD%  | REC%      | RSD% |
| 336 | Oxycarboxin                       | 115.22      | 12.05 | 98.46    | 6.55  | 91.05     | 8.76  |             |       |          |       |           |      |
| 337 | Oxyfluorfen                       |             |       |          |       | 62.50     | 9.32  | 99.05       | 5.47  | 97.74    | 6.10  | 92.33     | 5.20 |
| 338 | parathion                         |             |       |          |       |           |       | 87.49       | 12.68 | 103.39   | 4.58  | 95.52     | 5.97 |
| 339 | Parathion-Methyl                  |             |       |          |       |           |       | 103.13      | 6.54  | 96.23    | 3.08  | 92.41     | 5.36 |
| 340 | Pebulate                          | 96.14       | 6.39  | 95.03    | 9.89  | 94.87     | 7.96  | 86.43       | 6.67  | 93.36    | 6.56  | 90.31     | 2.17 |
| 341 | Penconazole                       | 98.57       | 3.44  | 96.47    | 7.96  | 94.33     | 6.53  | 93.23       | 2.30  | 94.35    | 5.09  | 95.84     | 6.69 |
| 342 | Penflufen                         | 103.89      | 1.27  | 97.83    | 2.16  | 99.38     | 5.99  |             |       |          |       |           |      |
| 343 | Penoxsulam                        | 76.97       | 1.42  | 88.00    | 4.31  | 85.75     | 6.84  |             |       |          |       |           |      |
| 344 | Pentanochlor                      | 107.40      | 2.91  | 100.54   | 2.84  | 94.34     | 5.83  | 96.31       | 6.14  | 96.56    | 4.95  | 90.58     | 5.27 |
| 345 | Penthiopyrad                      |             |       |          |       |           |       | 90.81       | 2.68  | 101.88   | 2.15  | 97.44     | 4.44 |
| 346 | Pentoxazone                       |             |       |          |       |           |       | 90.45       | 5.97  | 97.86    | 2.69  | 92.18     | 5.65 |
| 347 | Pethoxamid                        | 105.46      | 2.56  | 102.15   | 3.10  | 101.54    | 5.97  | 11.21       | 56.56 | 12.83    | 12.11 | 29.86     | 9.88 |
| 348 | Phenothrin                        |             |       |          |       |           |       | 95.80       | 4.61  | 81.92    | 1.91  | 84.99     | 3.23 |
| 349 | Phorate                           |             |       |          |       |           |       | 95.00       | 2.63  | 84.34    | 5.14  | 93.91     | 3.32 |
| 350 | Phorate-Sulfone                   | 112.31      | 5.16  | 106.34   | 5.25  | 107.33    | 6.54  | 99.46       | 2.10  | 100.49   | 6.27  | 92.61     | 7.72 |
| 351 | Phorate-Sulfoxide                 | 111.84      | 2.75  | 105.18   | 2.69  | 102.36    | 3.86  | 104.84      | 7.77  | 94.47    | 5.44  | 99.50     | 6.65 |
| 352 | Phosfolan                         | 101.28      | 2.01  | 95.30    | 2.50  | 86.33     | 4.53  | 98.18       | 8.38  | 104.26   | 3.12  | 91.43     | 6.73 |
| 353 | Phosfolan-Methyl                  | 99.45       | 3.07  | 88.55    | 5.07  | 79.03     | 5.61  |             |       |          |       |           |      |
| 354 | Phosphamidon                      | 101.87      | 1.32  | 99.83    | 3.48  | 98.45     | 4.12  | 94.23       | 9.64  | 98.78    | 6.41  | 85.92     | 6.59 |
| 355 | Phthalic Acid, Benzyl Butyl Ester | 103.11      | 10.32 | 90.78    | 3.09  | 104.39    | 3.34  |             |       |          |       |           |      |
| 356 | Phthalic Acid, Bis-Butyl Ester    | 107.19      | 3.59  | 97.37    | 4.56  | 93.11     | 7.21  |             |       |          |       |           |      |
| 357 | Phthalide                         |             |       |          |       |           |       | 85.99       | 6.89  | 90.06    | 4.26  | 84.23     | 5.54 |
| 358 | Picolinafen                       | 92.25       | 4.98  | 83.47    | 3.08  | 85.06     | 3.79  | 76.37       | 5.20  | 87.48    | 5.50  | 79.64     | 5.49 |
| 359 | Piperalin                         | 21.36       | 6.33  | 22.07    | 12.90 | 26.54     | 15.70 | 36.14       | 13.12 | 30.97    | 5.96  | 28.35     | 9.05 |
| 360 | Pirimiphos-methyl-N-desethyl      | 102.81      | 1.58  | 97.63    | 1.60  | 95.86     | 8.67  | 79.96       | 6.25  | 84.48    | 8.01  | 74.00     | 8.65 |
| 361 | Plifenate                         |             |       |          |       |           |       | 114.18      | 9.59  | 92.49    | 4.79  | 101.36    | 7.24 |
| 362 | Primisulfuron-Methyl              | 76.75       | 5.97  | 78.28    | 6.86  | 67.89     | 8.59  |             |       |          |       |           |      |
| 363 | Prodiamine                        |             |       |          |       |           |       | 90.63       | 6.58  | 83.65    | 7.86  | 95.56     | 4.67 |

| No. | Pesticides              | GC-Q-TOF/MS |       |          |       |           |       | LC-Q-TOF/MS |      |          |      |           |      |
|-----|-------------------------|-------------|-------|----------|-------|-----------|-------|-------------|------|----------|------|-----------|------|
|     |                         | 10 µg/kg    |       | 20 µg/kg |       | 100 µg/kg |       | 10 µg/kg    |      | 20 µg/kg |      | 100 µg/kg |      |
|     |                         | REC%        | RSD%  | REC%     | RSD%  | REC%      | RSD%  | REC%        | RSD% | REC%     | RSD% | REC%      | RSD% |
| 364 | Profluralin             |             |       |          |       |           |       | 85.09       | 8.21 | 103.73   | 6.63 | 88.24     | 3.42 |
| 365 | Profoxydim              | 70.71       | 9.47  | 63.95    | 6.61  | 101.87    | 16.85 | 86.27       | 6.84 | 96.81    | 3.96 | 79.68     | 4.67 |
| 366 | Promecarb               | 94.72       | 14.33 | 99.60    | 3.51  | 107.06    | 3.83  | 92.84       | 5.03 | 92.40    | 5.74 | 99.55     | 6.02 |
| 367 | Prometon                | 99.22       | 0.65  | 92.73    | 2.16  | 92.20     | 4.70  | 84.49       | 8.21 | 88.53    | 6.56 | 94.97     | 4.83 |
| 368 | Prometryn               | 102.63      | 1.34  | 97.76    | 2.58  | 97.93     | 6.23  | 92.53       | 5.60 | 81.62    | 5.76 | 84.72     | 8.18 |
| 369 | Propachlor              | 93.95       | 7.93  | 114.97   | 10.60 | 95.55     | 17.95 |             |      |          |      | 85.87     | 5.49 |
| 370 | Propaquizafop           | 88.56       | 3.24  | 87.48    | 3.34  | 83.74     | 3.34  |             |      |          |      |           |      |
| 371 | Propazine               | 105.82      | 4.24  | 100.35   | 5.88  | 90.25     | 10.78 | 93.70       | 3.65 | 96.76    | 5.20 | 97.53     | 4.52 |
| 372 | Propisochlor            | 99.00       | 3.70  | 98.43    | 2.96  | 120.13    | 10.96 | 77.92       | 2.30 | 85.90    | 1.08 | 76.99     | 2.93 |
| 373 | Propyzamide             | 99.65       | 4.23  | 93.03    | 3.18  | 102.14    | 5.18  | 94.87       | 5.14 | 97.30    | 0.99 | 95.28     | 6.03 |
| 374 | Proquinazid             | 66.13       | 3.30  | 57.77    | 5.89  | 48.51     | 12.07 |             |      |          |      |           |      |
| 375 | Prosulfocarb            | 105.74      | 6.09  | 100.53   | 2.55  | 100.49    | 4.80  | 91.91       | 2.83 | 94.46    | 2.22 | 85.75     | 5.31 |
| 376 | Prosulfuron             | 72.51       | 3.83  | 71.35    | 5.91  | 65.19     | 7.95  |             |      |          |      |           |      |
| 377 | Prothioconazole         | 63.20       | 23.16 | 42.59    | 8.00  | 53.69     | 11.90 |             |      |          |      |           |      |
| 378 | Prothioconazole-desthio |             |       |          |       |           |       | 95.23       | 5.11 | 100.83   | 2.81 | 91.09     | 5.05 |
| 379 | Prothiofos              | 103.55      | 31.48 | 105.65   | 21.82 | 102.50    | 10.39 | 92.64       | 7.92 | 96.27    | 5.86 | 90.61     | 6.02 |
| 380 | Prothoate               | 91.80       | 2.07  | 101.35   | 1.74  | 104.90    | 5.45  |             |      |          |      |           |      |
| 381 | Pyracarbolid            | 104.67      | 2.61  | 97.45    | 3.29  | 91.14     | 5.96  |             |      |          |      | 92.08     | 5.70 |
| 382 | Pyraclufos              | 93.42       | 1.54  | 91.64    | 3.27  | 89.58     | 6.49  |             |      |          |      |           |      |
| 383 | Pyraflufen              |             |       | 12.07    | 22.61 | 9.73      | 59.83 |             |      |          |      |           |      |
| 384 | Pyraflufen-Ethyl        | 106.20      | 1.64  | 100.75   | 2.00  | 106.56    | 8.55  |             |      |          |      |           |      |
| 385 | Pyrametostrobin         | 98.18       | 1.61  | 96.92    | 2.79  | 95.45     | 6.30  |             |      |          |      |           |      |
| 386 | Pyraoxystrobin          | 91.44       | 1.02  | 86.74    | 3.64  | 84.73     | 6.62  |             |      |          |      |           |      |
| 387 | Pyrazosulfuron-Ethyl    | 79.92       | 3.89  | 75.69    | 6.56  | 71.46     | 6.90  |             |      |          |      |           |      |
| 388 | Pyrazoxyfen             | 105.88      | 1.24  | 98.97    | 2.61  | 98.56     | 4.23  |             |      |          |      |           |      |
| 389 | Pyribenzoxim            |             |       |          |       | 83.09     | 7.22  |             |      |          |      |           |      |
| 390 | Pyributicarb            | 107.63      | 1.23  | 98.11    | 1.93  | 101.53    | 5.55  | 94.75       | 4.79 | 97.87    | 1.76 | 89.67     | 5.23 |
| 391 | Pyridaphenthion         | 99.56       | 2.98  | 96.14    | 4.42  | 99.69     | 5.10  | 98.05       | 4.22 | 99.75    | 4.06 | 91.08     | 4.82 |



| No. | Pesticides             | GC-Q-TOF/MS |       |          |       |           |       | LC-Q-TOF/MS |       |          |       |           |       |
|-----|------------------------|-------------|-------|----------|-------|-----------|-------|-------------|-------|----------|-------|-----------|-------|
|     |                        | 10 µg/kg    |       | 20 µg/kg |       | 100 µg/kg |       | 10 µg/kg    |       | 20 µg/kg |       | 100 µg/kg |       |
|     |                        | REC%        | RSD%  | REC%     | RSD%  | REC%      | RSD%  | REC%        | RSD%  | REC%     | RSD%  | REC%      | RSD%  |
| 392 | Pyrifthalid            | 101.91      | 2.45  | 101.67   | 2.45  | 99.24     | 6.13  | 96.73       | 3.37  | 95.41    | 3.32  | 98.29     | 3.16  |
| 393 | Pyrimethanil           | 63.87       | 5.30  | 63.50    | 5.52  | 64.15     | 8.19  | 81.50       | 10.69 | 76.02    | 3.27  | 59.77     | 5.78  |
| 394 | Pyrimitate             | 103.79      | 1.56  | 99.27    | 1.85  | 95.83     | 5.56  |             |       |          |       |           |       |
| 395 | Pyrimorph              |             |       |          |       |           |       | 93.06       | 6.07  | 94.47    | 5.38  | 96.32     | 2.78  |
| 396 | Pyriofenone            |             |       |          |       |           |       | 95.51       | 2.42  | 99.05    | 5.16  | 87.74     | 4.78  |
| 397 | Pyriproxyfen           | 101.58      | 2.71  | 90.94    | 2.27  | 84.18     | 6.35  | 97.25       | 4.28  | 92.69    | 5.55  | 82.67     | 6.33  |
| 398 | Pyrisoxazole           | 90.45       | 4.25  | 86.39    | 4.21  | 82.53     | 5.58  |             |       |          |       |           |       |
| 399 | Pyrithlobac            | 5.23        | 34.72 | 7.84     | 26.41 | 12.05     | 31.84 |             |       |          |       |           |       |
| 400 | Pyroquilon             | 95.36       | 2.92  | 93.23    | 4.39  | 86.85     | 5.07  | 87.02       | 2.86  | 91.16    | 2.39  | 85.92     | 4.14  |
| 401 | Quinoclamine           | 84.82       | 9.52  | 80.28    | 5.58  | 83.33     | 9.51  |             |       |          |       |           |       |
| 402 | Quinoxifen             | 76.46       | 4.59  | 71.16    | 4.43  | 70.70     | 5.00  | 75.25       | 6.61  | 77.74    | 4.15  | 64.94     | 1.42  |
| 403 | Quizalofop             | 8.98        | 33.74 | 15.13    | 16.17 | 17.34     | 18.83 |             |       |          |       |           |       |
| 404 | Quizalofop-Ethyl       | 94.24       | 3.37  | 88.79    | 5.46  | 90.99     | 3.21  | 86.38       | 11.70 | 93.93    | 9.65  | 92.44     | 8.23  |
| 405 | Rabenzazole            | 82.76       | 1.75  | 74.70    | 3.21  | 75.45     | 4.26  | 81.89       | 5.97  | 92.50    | 4.72  | 79.24     | 6.78  |
| 406 | Resmethrin             | 96.57       | 7.85  | 105.34   | 11.55 | 105.71    | 7.77  | 88.94       | 2.90  | 82.95    | 9.03  | 77.91     | 6.95  |
| 407 | Schradan               |             |       |          |       |           |       | 70.27       | 6.86  | 82.93    | 11.24 | 87.60     | 8.69  |
| 408 | Sebuthylazine          | 92.07       | 3.84  | 99.07    | 2.32  | 102.13    | 5.69  | 91.39       | 3.96  | 98.71    | 3.82  | 90.97     | 4.32  |
| 409 | Sebuthylazine-desethyl | 98.25       | 9.38  | 95.69    | 3.87  | 108.88    | 6.83  | 90.92       | 6.06  | 98.51    | 3.20  | 90.53     | 5.41  |
| 410 | Secbumeton             | 99.08       | 0.66  | 92.72    | 2.12  | 92.24     | 4.66  | 80.50       | 7.93  | 89.34    | 6.73  | 86.61     | 9.79  |
| 411 | Sedaxane               | 103.15      | 4.28  | 100.53   | 4.45  | 100.51    | 7.21  |             |       |          |       | 90.31     | 13.27 |
| 412 | Siduron                | 108.91      | 2.23  | 102.54   | 2.63  | 99.74     | 6.62  |             |       |          |       |           |       |
| 413 | Silthiofam             | 104.89      | 1.35  | 98.03    | 2.47  | 102.31    | 4.95  | 97.62       | 3.88  | 100.66   | 2.47  | 94.09     | 4.69  |
| 414 | Simazine               | 100.23      | 5.28  | 87.94    | 3.82  | 91.04     | 5.78  | 103.37      | 2.58  | 94.70    | 5.76  | 89.21     | 9.39  |
| 415 | Simeconazole           |             |       |          |       |           |       | 98.36       | 5.21  | 91.07    | 1.57  | 91.77     | 2.88  |
| 416 | Simeton                | 95.94       | 1.99  | 80.25    | 4.21  | 72.06     | 9.04  | 89.27       | 5.45  | 84.87    | 7.85  | 81.24     | 5.32  |
| 417 | Simetryn               | 98.00       | 0.73  | 88.28    | 2.37  | 87.48     | 6.08  | 92.34       | 14.46 | 84.87    | 6.79  | 89.54     | 3.55  |
| 418 | Spirodiclofen          | 103.79      | 13.20 | 89.10    | 5.50  | 100.71    | 13.19 |             |       |          |       | 95.10     | 3.30  |
| 419 | Spiromesifen           | 104.16      | 4.12  | 91.56    | 3.13  | 86.60     | 6.28  | 94.82       | 5.93  | 97.25    | 3.07  | 81.97     | 7.11  |

| No. | Pesticides                   | GC-Q-TOF/MS |       |          |       |           |       | LC-Q-TOF/MS |       |          |       |           |       |
|-----|------------------------------|-------------|-------|----------|-------|-----------|-------|-------------|-------|----------|-------|-----------|-------|
|     |                              | 10 µg/kg    |       | 20 µg/kg |       | 100 µg/kg |       | 10 µg/kg    |       | 20 µg/kg |       | 100 µg/kg |       |
|     |                              | REC%        | RSD%  | REC%     | RSD%  | REC%      | RSD%  | REC%        | RSD%  | REC%     | RSD%  | REC%      | RSD%  |
| 420 | Spirotetramat                | 97.30       | 2.89  | 94.59    | 2.49  | 85.96     | 8.69  |             |       |          |       |           |       |
| 421 | Spirotetramat-enol-glucoside |             |       | 30.25    | 45.99 | 39.64     | 17.72 |             |       |          |       |           |       |
| 422 | Spirotetramat-keto-hydroxy   | 100.60      | 7.47  | 93.11    | 3.05  | 90.45     | 5.01  |             |       |          |       |           |       |
| 423 | Spirotetramat-mono-hydroxy   | 99.98       | 7.95  | 93.70    | 4.68  | 96.15     | 2.51  |             |       |          |       | 105.61    | 24.53 |
| 424 | Spiroxamine                  | 28.97       | 6.77  | 26.00    | 13.11 | 29.60     | 14.92 | 27.29       | 32.96 | 25.00    | 8.39  | 27.20     | 6.81  |
| 425 | Sulfallate                   |             |       |          |       |           |       | 86.50       | 8.12  | 93.64    | 5.29  | 88.00     | 3.81  |
| 426 | Sulfluramid                  |             |       |          |       |           |       | 90.24       | 10.84 | 94.09    | 12.99 | 92.03     | 2.80  |
| 427 | Sulfometuron-Methyl          | 90.44       | 2.79  | 87.67    | 5.08  | 73.56     | 6.97  |             |       |          |       |           |       |
| 428 | Sulfosulfuron                | 59.04       | 7.51  | 61.49    | 9.03  | 51.44     | 8.03  |             |       |          |       |           |       |
| 429 | Sulfotep                     | 111.29      | 2.57  | 104.40   | 2.78  | 103.19    | 4.95  | 97.48       | 6.01  | 95.43    | 4.08  | 91.96     | 4.16  |
| 430 | Sulprofos                    | 108.92      | 9.87  | 89.77    | 5.03  | 109.76    | 4.61  |             |       |          |       |           |       |
| 431 | TCMTB                        | 86.64       | 5.68  | 84.78    | 2.54  | 71.49     | 8.71  | 89.83       | 9.29  | 74.27    | 5.23  | 49.54     | 5.78  |
| 432 | Tebufenpyrad                 | 97.30       | 4.21  | 97.51    | 3.30  | 97.51     | 4.47  | 89.80       | 5.00  | 93.31    | 2.45  | 90.01     | 3.85  |
| 433 | Tebupirimfos                 | 104.85      | 3.41  | 93.66    | 2.40  | 91.71     | 6.64  | 96.40       | 4.74  | 95.80    | 3.26  | 89.86     | 4.03  |
| 434 | Tebutam                      | 101.06      | 3.09  | 101.58   | 2.82  | 101.95    | 6.25  | 98.59       | 3.87  | 93.90    | 3.42  | 93.39     | 4.72  |
| 435 | Tebuthiuron                  | 96.94       | 14.44 | 96.21    | 7.03  | 107.25    | 2.59  | 96.95       | 5.87  | 101.32   | 5.93  | 77.52     | 9.07  |
| 436 | Teflubenzuron                |             |       |          |       |           |       | 98.93       | 6.52  | 95.86    | 2.73  | 98.23     | 10.10 |
| 437 | Tembotrione                  | 25.55       | 3.26  | 26.52    | 13.18 | 27.93     | 13.93 |             |       |          |       |           |       |
| 438 | Temephos                     | 119.57      | 4.01  | 90.82    | 4.24  | 97.95     | 5.71  |             |       |          |       |           |       |
| 439 | Terbacil                     |             |       |          |       |           |       | 89.85       | 6.94  | 99.90    | 5.64  | 93.09     | 5.46  |
| 440 | Terbucarb                    | 102.04      | 3.72  | 102.63   | 4.61  | 102.55    | 6.40  | 103.16      | 5.60  | 99.45    | 3.32  | 88.53     | 5.68  |
| 441 | Terbufos                     |             |       |          |       |           |       | 86.01       | 2.70  | 91.90    | 4.18  | 92.75     | 2.82  |
| 442 | Terbufos-Sulfone             | 107.54      | 4.30  | 101.97   | 4.10  | 105.49    | 5.00  | 97.72       | 2.38  | 105.63   | 4.59  | 97.25     | 4.87  |
| 443 | Terbufos-Sulfoxide           | 108.88      | 4.95  | 110.96   | 6.77  | 96.45     | 5.08  |             |       |          |       |           |       |
| 444 | Terbumeton                   | 99.36       | 1.00  | 95.61    | 3.01  | 95.85     | 4.77  | 96.65       | 5.74  | 89.04    | 5.08  | 90.04     | 6.84  |
| 445 | Terbuthylazine               | 104.27      | 2.39  | 95.99    | 3.96  | 95.98     | 5.93  | 96.81       | 4.52  | 92.30    | 1.92  | 91.86     | 4.35  |
| 446 | Terbutryn                    | 102.72      | 1.51  | 98.38    | 3.10  | 95.64     | 6.10  | 93.59       | 6.29  | 78.40    | 6.35  | 87.46     | 4.81  |
| 447 | Tetraconazole                | 113.65      | 5.04  | 106.83   | 5.52  | 100.19    | 4.43  | 101.44      | 2.44  | 95.13    | 3.27  | 98.23     | 6.58  |

| No. | Pesticides            | GC-Q-TOF/MS |       |          |       |           |       | LC-Q-TOF/MS |       |          |      |           |      |
|-----|-----------------------|-------------|-------|----------|-------|-----------|-------|-------------|-------|----------|------|-----------|------|
|     |                       | 10 µg/kg    |       | 20 µg/kg |       | 100 µg/kg |       | 10 µg/kg    |       | 20 µg/kg |      | 100 µg/kg |      |
|     |                       | REC%        | RSD%  | REC%     | RSD%  | REC%      | RSD%  | REC%        | RSD%  | REC%     | RSD% | REC%      | RSD% |
| 448 | Tetrasul              |             |       |          |       |           |       | 77.27       | 7.00  | 74.24    | 5.82 | 69.15     | 3.35 |
| 449 | Thenylchlor           | 103.62      | 3.33  | 102.17   | 1.66  | 104.03    | 4.58  | 98.12       | 3.45  | 107.04   | 2.93 | 91.59     | 5.36 |
| 450 | Thiazafluron          | 109.18      | 5.18  | 92.31    | 5.47  | 86.21     | 7.08  |             |       |          |      |           |      |
| 451 | Thiazopyr             | 106.27      | 0.82  | 100.78   | 0.92  | 101.38    | 5.09  | 89.28       | 9.74  | 104.48   | 4.99 | 97.62     | 2.88 |
| 452 | Thifluzamide          |             |       | 127.98   | 21.03 | 125.72    | 8.07  | 91.91       | 2.97  | 100.49   | 3.52 | 97.03     | 7.33 |
| 453 | Thiobencarb           | 108.99      | 10.49 | 170.82   | 88.54 | 97.42     | 7.31  |             |       |          |      | 90.83     | 8.08 |
| 454 | Thiodicarb            | 78.95       | 4.00  | 59.68    | 9.09  | 40.03     | 12.76 |             |       |          |      |           |      |
| 455 | Thiofanox             |             |       |          |       |           |       |             |       |          |      | 92.65     | 7.33 |
| 456 | Thiofanox-Sulfone     |             |       | 75.83    | 19.80 | 80.65     | 5.85  |             |       |          |      |           |      |
| 457 | Thiometon             |             |       |          |       |           |       | 74.25       | 3.90  | 69.86    | 5.18 | 63.78     | 9.28 |
| 458 | Thionazin             | 104.81      | 4.91  | 106.57   | 5.21  | 94.19     | 8.81  |             |       |          |      |           |      |
| 459 | Tiadinil              | 71.89       | 26.43 | 101.74   | 15.86 | 86.48     | 8.68  |             |       |          |      |           |      |
| 460 | Tiocarbazil           | 102.83      | 5.61  | 83.50    | 2.58  | 78.24     | 12.77 | 102.63      | 8.59  | 89.53    | 3.29 | 90.27     | 4.08 |
| 461 | Tolclofos-Methyl      | 102.88      | 7.77  | 117.59   | 11.99 | 89.56     | 7.53  | 93.90       | 5.77  | 96.14    | 3.86 | 90.75     | 2.65 |
| 462 | Tolfenpyrad           | 105.31      | 2.85  | 98.54    | 3.35  | 92.33     | 3.55  |             |       |          |      | 83.29     | 6.96 |
| 463 | trans-Diallate        |             |       |          |       |           |       | 90.43       | 6.79  | 94.33    | 5.85 | 87.88     | 8.29 |
| 464 | triallate             | 114.57      | 10.28 | 97.69    | 11.16 | 99.21     | 7.70  | 96.32       | 11.91 | 95.59    | 5.16 | 89.05     | 3.74 |
| 465 | Triamiphos            | 94.05       | 2.41  | 90.44    | 2.75  | 89.09     | 4.42  | 84.72       | 4.89  | 96.15    | 3.40 | 97.97     | 6.61 |
| 466 | Triapenthenol         | 107.05      | 2.23  | 96.41    | 3.01  | 101.14    | 5.29  | 95.82       | 3.07  | 94.67    | 3.77 | 90.32     | 5.18 |
| 467 | Triasulfuron          | 94.84       | 1.17  | 88.80    | 3.06  | 82.05     | 6.47  |             |       |          |      |           |      |
| 468 | Tribufos              | 96.71       | 6.38  | 81.82    | 2.51  | 87.25     | 5.70  | 102.46      | 7.64  | 102.61   | 3.86 | 89.87     | 6.33 |
| 469 | Trichloronat          |             |       |          |       |           |       | 97.07       | 4.47  | 92.35    | 4.63 | 89.00     | 4.63 |
| 470 | Triclopyricarb        | 98.82       | 11.16 | 90.21    | 9.19  | 75.93     | 9.25  |             |       |          |      |           |      |
| 471 | Trietazine            | 105.99      | 2.60  | 98.18    | 2.73  | 99.33     | 4.88  | 99.76       | 4.06  | 95.27    | 3.09 | 91.85     | 2.84 |
| 472 | Trifloxystrobin       | 109.99      | 2.89  | 100.89   | 1.72  | 102.10    | 4.00  | 78.77       | 40.62 | 94.93    | 4.80 | 93.65     | 5.40 |
| 473 | Triflumizole          | 98.47       | 2.30  | 93.65    | 2.69  | 93.70     | 6.61  | 95.16       | 1.72  | 99.60    | 6.77 | 98.27     | 5.66 |
| 474 | Trifluralin           |             |       |          |       |           |       | 97.52       | 4.95  | 95.40    | 4.02 | 89.69     | 2.87 |
| 475 | Triflusulfuron-Methyl | 97.93       | 7.36  | 89.85    | 5.16  | 76.79     | 8.25  |             |       |          |      |           |      |

| No. | Pesticides             | GC-Q-TOF/MS |       |          |       |           |       | LC-Q-TOF/MS |      |          |       |           |      |
|-----|------------------------|-------------|-------|----------|-------|-----------|-------|-------------|------|----------|-------|-----------|------|
|     |                        | 10 µg/kg    |       | 20 µg/kg |       | 100 µg/kg |       | 10 µg/kg    |      | 20 µg/kg |       | 100 µg/kg |      |
|     |                        | REC%        | RSD%  | REC%     | RSD%  | REC%      | RSD%  | REC%        | RSD% | REC%     | RSD%  | REC%      | RSD% |
| 476 | Tri-Isobutyl Phosphate | 101.92      | 2.68  | 101.07   | 0.93  | 105.09    | 6.73  | 96.53       | 4.89 | 96.40    | 4.70  | 101.49    | 4.51 |
| 477 | Trinexapac-Ethyl       | 87.82       | 10.33 | 76.67    | 2.68  | 71.06     | 7.41  |             |      |          |       |           |      |
| 478 | Triticonazole          |             | 3.97  | 76.03    | 2.36  | 90.28     | 7.15  | 77.77       | 4.86 | 96.00    | 10.41 | 87.67     | 8.77 |
| 479 | Tritosulfuron          | 40.36       | 35.90 | 54.81    | 23.02 | 64.21     | 14.69 |             |      |          |       |           |      |
| 480 | Uniconazole            | 99.62       | 3.57  | 91.60    | 1.25  | 95.31     | 4.49  | 94.89       | 7.80 | 94.59    | 4.43  | 90.77     | 4.84 |
| 481 | Vernolate              | 92.69       | 7.84  | 91.78    | 10.17 | 92.77     | 8.17  | 82.87       | 4.97 | 95.21    | 6.64  | 99.70     | 4.56 |
| 482 | Zoxamide               | 100.95      | 5.12  | 100.25   | 1.75  | 99.95     | 5.11  | 71.13       | 4.32 | 73.78    | 4.98  | 77.34     | 7.73 |

**Supplemental Table 4** Recovery and precision data for 482 pesticide residues in *Radix Codonopsis* using manual QuEChERS procedure (n= 5)

| No. | Pesticides                                   | GC-Q-TOF/MS |       |          |       |           |       | LC-Q-TOF/MS |       |          |      |           |      |
|-----|----------------------------------------------|-------------|-------|----------|-------|-----------|-------|-------------|-------|----------|------|-----------|------|
|     |                                              | 10 µg/kg    |       | 20 µg/kg |       | 100 µg/kg |       | 10 µg/kg    |       | 20 µg/kg |      | 100 µg/kg |      |
|     |                                              | REC%        | RSD%  | REC%     | RSD%  | REC%      | RSD%  | REC%        | RSD%  | REC%     | RSD% | REC%      | RSD% |
| 1   | 1,4-Dimethylnaphthalene                      |             |       |          |       |           |       | 83.52       | 9.30  | 90.60    | 5.96 | 85.95     | 3.84 |
| 2   | 1-Naphthyl Acetamide                         |             |       | 89.64    | 9.69  | 87.87     | 4.53  |             |       |          |      |           |      |
| 3   | 2,3,4,5-Tetrachloroaniline                   |             |       |          |       |           |       | 73.49       | 8.03  | 84.09    | 7.32 | 77.49     | 7.04 |
| 4   | 2,4'-DDT                                     |             |       |          |       |           |       | 78.69       | 12.84 | 87.05    | 4.69 | 85.83     | 3.56 |
| 5   | 2,4-D-ethylhexyl                             |             |       |          |       |           |       | 83.84       | 12.82 | 89.83    | 5.11 | 88.98     | 3.46 |
| 6   | 2,4'-Dicofol                                 |             |       |          |       |           |       | 90.73       | 10.16 | 95.63    | 7.11 | 95.85     | 3.22 |
| 7   | 2,6-Dichlorobenzamide                        |             |       | 120.06   | 13.82 | 87.09     | 4.42  |             |       |          |      |           |      |
| 8   | 3,4,5-Trimethacarb                           | 102.91      | 8.87  | 92.46    | 6.30  | 100.19    | 5.15  |             |       |          |      |           |      |
| 9   | 4,4'-DDD                                     |             |       |          |       |           |       | 84.18       | 9.17  | 93.98    | 7.40 | 87.98     | 4.42 |
| 10  | 4,4'-DDE                                     |             |       |          |       |           |       | 81.90       | 5.22  | 84.98    | 5.20 | 85.79     | 2.26 |
| 11  | 4-Bromo-3,5-Dimethylphenyl-N-Methylcarbamate |             |       |          |       |           |       | 85.21       | 9.05  | 93.90    | 9.74 | 92.76     | 4.22 |
| 12  | 4'-Chloro-2,2,2-trifluoroacetophenone        |             |       |          |       |           |       | 66.16       | 10.71 | 73.96    | 7.34 | 76.61     | 7.00 |
| 13  | 6-Isopentenyl aminopurine                    |             |       |          |       |           |       | 87.29       | 3.98  | 89.75    | 3.75 | 85.27     | 3.51 |
| 14  | Acibenzolar-S-methyl                         | 11.06       | 17.79 | 11.54    | 19.52 | 10.67     | 9.86  |             |       |          |      |           |      |
| 15  | Akton                                        |             |       |          |       |           |       | 99.75       | 5.13  | 85.17    | 7.17 | 76.81     | 4.07 |
| 16  | Aldicarb-sulfone                             | 98.41       | 12.70 | 92.42    | 10.21 | 79.30     | 6.16  | 92.17       | 5.53  | 97.42    | 3.37 | 94.37     | 2.26 |
| 17  | Aldicarb-sulfoxide                           | 96.82       | 6.24  | 92.75    | 8.19  | 94.63     | 3.41  | 81.24       | 12.28 | 85.41    | 4.52 | 93.92     | 3.37 |
| 18  | Aldrin                                       |             |       |          |       | 87.02     | 12.08 |             |       |          |      |           |      |
| 19  | Allidochlor                                  |             |       |          |       |           |       | 89.40       | 4.79  | 86.21    | 2.42 | 85.87     | 3.15 |
| 20  | alpha-Endosulfan                             | 98.17       | 5.81  | 83.95    | 8.86  | 79.09     | 4.90  |             |       |          |      |           |      |
| 21  | alpha-HCH                                    |             |       |          |       |           |       | 84.72       | 3.96  | 91.94    | 6.06 | 92.09     | 2.15 |
| 22  | Ametryn                                      |             |       |          |       |           |       | 94.11       | 4.69  | 105.87   | 7.82 | 98.32     | 4.32 |
| 23  | Amidosulfuron                                | 90.20       | 3.25  | 90.02    | 5.76  | 84.69     | 3.69  |             |       |          |      |           |      |
| 24  | Aminocarb                                    | 41.83       | 6.88  | 41.30    | 7.46  | 40.53     | 5.66  |             |       |          |      | 54.75     | 6.12 |
| 25  | Ancymidol                                    | 89.98       | 3.81  | 93.27    | 3.19  | 91.88     | 2.55  |             |       |          |      |           |      |
| 26  | Anilofos                                     | 97.84       | 6.69  | 94.04    | 4.42  | 88.46     | 2.87  |             |       |          |      |           |      |
| 27  | Anthraquinone                                | 96.86       | 3.44  | 100.16   | 5.49  | 91.90     | 3.00  |             |       |          |      |           |      |

| No. | Pesticides            | GC-Q-TOF/MS |       |          |       |           |       | LC-Q-TOF/MS |       |          |       |           |      |
|-----|-----------------------|-------------|-------|----------|-------|-----------|-------|-------------|-------|----------|-------|-----------|------|
|     |                       | 10 µg/kg    |       | 20 µg/kg |       | 100 µg/kg |       | 10 µg/kg    |       | 20 µg/kg |       | 100 µg/kg |      |
|     |                       | REC%        | RSD%  | REC%     | RSD%  | REC%      | RSD%  | REC%        | RSD%  | REC%     | RSD%  | REC%      | RSD% |
| 28  | Aramite               |             |       |          |       |           |       | 66.26       | 13.27 | 89.00    | 11.22 | 66.80     | 3.73 |
| 29  | Aspon                 |             |       |          |       | 81.37     | 14.80 |             |       |          |       |           |      |
| 30  | Atraton               |             |       |          |       |           |       | 91.44       | 3.83  | 94.12    | 4.26  | 93.13     | 2.80 |
| 31  | Atrazine-desethyl     | 86.06       | 3.70  | 86.90    | 3.98  | 83.19     | 3.48  |             |       |          |       |           |      |
| 32  | Atrazine-desisopropyl | 90.68       | 19.81 | 85.34    | 16.62 | 80.80     | 5.45  |             |       |          |       |           |      |
| 33  | Azaconazole           | 83.82       | 16.01 | 79.29    | 8.11  | 87.78     | 5.95  |             |       |          |       |           |      |
| 34  | azadirachtin          | 81.17       | 21.81 | 83.26    | 5.74  | 79.27     | 3.28  |             |       |          |       |           |      |
| 35  | Azimsulfuron          | 106.73      | 9.21  | 93.99    | 4.11  | 86.67     | 3.80  |             |       |          |       |           |      |
| 36  | Aziprotryne           | 59.23       | 6.48  | 59.33    | 8.93  | 56.85     | 5.91  |             |       |          |       |           |      |
| 37  | Beflubutamid          | 101.55      | 5.89  | 86.29    | 7.73  | 91.20     | 3.25  |             |       |          |       |           |      |
| 38  | Benalaxyl             | 95.70       | 3.51  | 97.85    | 4.38  | 93.77     | 3.90  |             |       |          |       |           |      |
| 39  | Benazolin-ethyl       | 95.38       | 3.29  | 98.64    | 6.24  | 92.97     | 4.01  |             |       |          |       |           |      |
| 40  | Bendiocarb            |             |       |          |       |           |       | 90.45       | 10.62 | 88.92    | 8.42  | 92.12     | 3.14 |
| 41  | Benodanil             | 87.35       | 8.26  | 100.12   | 3.97  | 95.94     | 6.54  |             |       |          |       |           |      |
| 42  | Benoxacor             | 98.90       | 2.91  | 99.88    | 4.71  | 97.60     | 2.58  |             |       |          |       |           |      |
| 43  | Bensulide             |             |       | 89.63    | 18.00 | 73.56     | 6.27  |             |       |          |       |           |      |
| 44  | Benzobicyclon         | 104.89      | 6.05  | 105.26   | 7.38  | 97.33     | 4.38  |             |       |          |       |           |      |
| 45  | Benzovindiflupyr      | 80.18       | 6.54  | 82.09    | 10.65 | 81.84     | 7.13  |             |       |          |       |           |      |
| 46  | Benzoximate           | 98.74       | 3.15  | 97.71    | 5.20  | 90.63     | 3.66  |             |       | 82.28    | 8.14  | 100.97    | 6.14 |
| 47  | Benzoylprop           |             |       |          |       |           |       | 95.13       | 17.63 | 101.39   | 10.24 | 106.29    | 1.72 |
| 48  | Benzoylprop-Ethyl     |             |       | 12.67    | 46.04 | 16.58     | 14.52 |             |       |          |       |           |      |
| 49  | beta-Endosulfan       | 105.20      | 2.94  | 100.58   | 4.73  | 94.04     | 3.63  |             |       |          |       |           |      |
| 50  | beta-HCH              |             |       |          |       |           |       | 98.05       | 4.80  | 98.05    | 9.04  | 94.50     | 4.13 |
| 51  | Bitertanol            |             |       |          |       |           |       | 95.26       | 5.10  | 97.64    | 8.40  | 91.78     | 3.83 |
| 52  | Bixafen               | 94.39       | 10.33 | 88.64    | 7.53  | 90.28     | 3.76  |             |       |          |       |           |      |
| 53  | Boscalid              |             |       |          |       |           |       |             |       | 79.65    | 6.62  | 87.30     | 7.17 |
| 54  | Brodifacoum           | 88.28       | 6.01  | 89.49    | 7.47  | 93.43     | 4.07  |             |       |          |       |           |      |
| 55  | Bromacil              | 27.15       | 15.18 | 28.83    | 10.29 | 24.81     | 7.59  |             |       |          |       |           |      |

| No. | Pesticides             | GC-Q-TOF/MS |       |          |       |           |       | LC-Q-TOF/MS |       |          |       |           |       |
|-----|------------------------|-------------|-------|----------|-------|-----------|-------|-------------|-------|----------|-------|-----------|-------|
|     |                        | 10 µg/kg    |       | 20 µg/kg |       | 100 µg/kg |       | 10 µg/kg    |       | 20 µg/kg |       | 100 µg/kg |       |
|     |                        | REC%        | RSD%  | REC%     | RSD%  | REC%      | RSD%  | REC%        | RSD%  | REC%     | RSD%  | REC%      | RSD%  |
| 56  | Bromadiolon            | 77.84       | 8.02  | 91.30    | 8.31  | 89.61     | 3.45  |             |       |          |       |           |       |
| 57  | Bromfenvinfos-Methyl   | 41.89       | 39.64 | 28.27    | 18.98 | 31.14     | 7.72  |             |       |          |       |           |       |
| 58  | Bromobutide            | 79.86       | 5.72  | 97.59    | 4.48  | 91.52     | 4.37  | 93.41       | 22.31 | 100.16   | 6.96  | 99.26     | 3.97  |
| 59  | Bromophos-Methyl       | 104.74      | 4.62  | 101.77   | 5.83  | 94.00     | 3.59  |             |       |          |       |           |       |
| 60  | Bromuconazole          |             |       |          |       |           |       | 85.73       | 12.14 | 90.08    | 7.50  | 88.71     | 4.19  |
| 61  | Bupirimate             | 93.75       | 4.84  | 92.04    | 4.35  | 86.40     | 2.70  |             |       |          |       |           |       |
| 62  | Butafenacil            | 91.12       | 3.72  | 94.42    | 4.98  | 90.37     | 3.75  |             |       |          |       |           |       |
| 63  | Butamifos              | 96.09       | 4.23  | 100.79   | 6.16  | 92.76     | 4.50  |             |       |          |       |           |       |
| 64  | Butocarboxim-Sulfoxide | 102.53      | 4.17  | 105.48   | 5.80  | 92.80     | 2.25  | 90.49       | 7.96  | 117.37   | 7.63  | 109.43    | 7.04  |
| 65  | Butylate               | 104.81      | 15.77 | 74.74    | 9.54  | 74.37     | 6.80  |             |       |          |       |           |       |
| 66  | Cadusafos              |             |       |          |       |           |       | 99.88       | 12.84 | 89.53    | 7.18  | 88.74     | 1.74  |
| 67  | Cafenstrole            | 93.74       | 5.06  | 95.87    | 4.29  | 87.59     | 3.57  | 94.45       | 8.23  | 90.45    | 5.05  | 97.45     | 3.35  |
| 68  | Carbofuran             | 93.11       | 5.67  | 100.87   | 7.66  | 95.74     | 6.70  |             |       |          |       |           |       |
| 69  | Carbofuran-3-Hydroxy   | 98.10       | 14.65 | 99.81    | 4.64  | 92.54     | 1.37  |             |       |          |       |           |       |
| 70  | Carboxin               |             |       |          |       | 94.70     | 4.40  |             |       |          |       |           |       |
| 71  | Carfentrazone-ethyl    | 83.63       | 3.19  | 85.13    | 3.99  | 80.37     | 1.58  |             |       |          |       |           |       |
| 72  | Carpropamid            | 96.14       | 4.86  | 98.68    | 5.67  | 92.00     | 4.06  | 86.96       | 9.88  | 98.74    | 10.29 | 100.76    | 4.20  |
| 73  | Chlorbenzuron          | 96.21       | 4.87  | 94.70    | 4.46  | 92.83     | 2.80  |             |       |          |       |           |       |
| 74  | Chlorbufam             | 66.07       | 6.68  | 66.44    | 4.46  | 63.18     | 4.58  | 76.71       | 8.54  | 78.38    | 9.31  | 73.44     | 3.03  |
| 75  | Chlordimeform          |             |       |          |       |           |       |             |       | 82.84    | 4.10  | 95.57     | 8.81  |
| 76  | Chlorethoxyfos         |             |       |          |       | 14.52     | 36.53 |             |       |          |       | 95.30     | 10.93 |
| 77  | Chlorfenethol          |             |       |          |       |           |       | 91.08       | 6.43  | 107.34   | 4.06  | 93.77     | 3.98  |
| 78  | Chlorfenvinphos        |             |       |          |       |           |       | 87.52       | 10.74 | 89.06    | 9.71  | 98.63     | 2.34  |
| 79  | Chloridazon            | 91.77       | 9.93  | 99.23    | 6.60  | 91.19     | 6.00  |             |       |          |       |           |       |
| 80  | Chlorimuron-ethyl      | 98.76       | 3.85  | 78.52    | 6.07  | 71.93     | 3.84  |             |       |          |       |           |       |
| 81  | Chlormephos            | 73.54       | 6.32  | 71.24    | 11.64 | 73.62     | 6.79  |             |       |          |       |           |       |
| 82  | Chlorphonium           |             |       |          |       |           |       | 93.26       | 8.61  | 94.95    | 4.60  | 98.66     | 3.43  |
| 83  | Chlorphoxim            | 25.83       | 7.93  | 25.88    | 14.65 | 24.08     | 9.57  |             |       |          |       |           |       |

| No. | Pesticides           | GC-Q-TOF/MS |       |          |       |           |       | LC-Q-TOF/MS |       |          |       |           |      |
|-----|----------------------|-------------|-------|----------|-------|-----------|-------|-------------|-------|----------|-------|-----------|------|
|     |                      | 10 µg/kg    |       | 20 µg/kg |       | 100 µg/kg |       | 10 µg/kg    |       | 20 µg/kg |       | 100 µg/kg |      |
|     |                      | REC%        | RSD%  | REC%     | RSD%  | REC%      | RSD%  | REC%        | RSD%  | REC%     | RSD%  | REC%      | RSD% |
| 84  | Chlorpropham         | 117.27      | 8.45  | 96.52    | 4.68  | 92.22     | 3.73  |             |       |          |       |           |      |
| 85  | Chlorsulfuron        |             |       |          |       |           |       | 89.06       | 21.53 | 87.57    | 10.77 | 102.50    | 7.06 |
| 86  | Chlorthion           | 41.34       | 12.12 | 39.91    | 10.81 | 37.31     | 6.47  |             |       |          |       |           |      |
| 87  | Chlorthiophos        |             |       |          |       |           |       | 108.25      | 13.68 | 96.21    | 12.17 | 90.93     | 4.64 |
| 88  | Cinidon-Ethyl        |             |       |          |       |           |       | 78.06       | 10.71 | 79.26    | 6.66  | 82.99     | 5.06 |
| 89  | cis-Diallate         |             |       |          |       | 64.40     | 25.35 |             |       |          |       |           |      |
| 90  | Clodinafop           |             |       |          |       |           |       | 100.76      | 2.63  | 100.37   | 6.89  | 96.07     | 5.04 |
| 91  | Clodinafop-propargyl |             |       | 12.29    | 36.78 | 10.84     | 10.34 |             |       |          |       |           |      |
| 92  | Clofencet            | 99.76       | 1.73  | 96.26    | 4.64  | 90.67     | 3.04  | 88.47       | 14.42 | 92.50    | 8.74  | 93.24     | 8.44 |
| 93  | Clomazone            | 17.57       | 9.23  | 16.61    | 11.93 | 17.56     | 9.60  |             |       |          |       |           |      |
| 94  | Clomeprop            | 100.72      | 2.77  | 101.04   | 3.50  | 94.63     | 3.95  |             |       |          |       |           |      |
| 95  | Cloransulam-Methyl   | 67.40       | 9.12  | 71.50    | 8.28  | 64.14     | 4.73  |             |       |          |       |           |      |
| 96  | Coumaphos            | 67.52       | 6.07  | 69.14    | 11.35 | 70.40     | 7.94  |             |       |          |       |           |      |
| 97  | coumaphos-oxon       | 78.68       | 11.26 | 73.51    | 5.60  | 72.45     | 3.35  |             |       |          |       |           |      |
| 98  | Crimidine            | 81.77       | 7.12  | 81.86    | 6.32  | 82.03     | 5.82  |             |       |          |       |           |      |
| 99  | Crufomate            |             |       |          |       |           |       | 87.24       | 11.15 | 97.28    | 8.26  | 96.20     | 3.86 |
| 100 | Cyanazine            | 90.76       | 4.97  | 95.19    | 7.09  | 90.83     | 4.86  | 77.08       | 15.00 | 103.32   | 8.42  | 102.88    | 4.24 |
| 101 | Cyazofamid           | 97.10       | 7.87  | 93.28    | 6.40  | 91.44     | 2.92  |             |       |          |       |           |      |
| 102 | Cycloate             | 101.21      | 4.97  | 95.26    | 5.73  | 93.62     | 4.20  |             |       |          |       |           |      |
| 103 | Cycluron             | 86.05       | 8.65  | 106.70   | 7.19  | 90.66     | 5.57  |             |       |          |       |           |      |
| 104 | Cyenopyrafen         | 88.82       | 4.31  | 88.34    | 3.87  | 85.54     | 3.23  |             |       |          |       |           |      |
| 105 | Cyflufenamid         | 92.89       | 3.00  | 93.25    | 5.79  | 87.82     | 3.05  | 77.08       | 13.84 | 94.94    | 5.60  | 95.91     | 3.48 |
| 106 | Cyhalofop-Butyl      | 109.10      | 3.29  | 102.13   | 5.28  | 94.82     | 4.35  |             |       |          |       |           |      |
| 107 | Cymiazole            |             |       |          |       |           |       | 85.86       | 12.20 | 89.46    | 9.36  | 100.05    | 4.07 |
| 108 | Cymoxanil            | 69.61       | 20.57 | 78.25    | 4.28  | 65.27     | 5.20  | 74.61       | 7.84  | 75.95    | 5.68  | 76.95     | 3.66 |
| 109 | Cyprazine            |             |       |          |       | 87.65     | 11.53 |             |       |          |       |           |      |
| 110 | Cyproconazole        | 94.79       | 3.32  | 92.77    | 3.54  | 90.32     | 3.02  |             |       |          |       |           |      |
| 111 | Cyprofuram           | 94.94       | 3.85  | 91.50    | 1.54  | 88.74     | 2.19  |             |       |          |       |           |      |



| No. | Pesticides                   | GC-Q-TOF/MS |       |          |       |           |       | LC-Q-TOF/MS |       |          |       |           |      |
|-----|------------------------------|-------------|-------|----------|-------|-----------|-------|-------------|-------|----------|-------|-----------|------|
|     |                              | 10 µg/kg    |       | 20 µg/kg |       | 100 µg/kg |       | 10 µg/kg    |       | 20 µg/kg |       | 100 µg/kg |      |
|     |                              | REC%        | RSD%  | REC%     | RSD%  | REC%      | RSD%  | REC%        | RSD%  | REC%     | RSD%  | REC%      | RSD% |
| 112 | Cyromazine                   | 100.93      | 2.18  | 98.57    | 2.42  | 94.08     | 2.89  |             |       |          |       |           |      |
| 113 | Daimuron                     | 55.23       | 21.46 | 50.08    | 18.41 | 21.8      | 19.31 |             |       |          |       |           |      |
| 114 | DDT                          | 95.54       | 3.76  | 98.47    | 5.98  | 94.34     | 4.39  |             |       |          |       |           |      |
| 115 | delta-HCH                    |             |       |          |       |           |       | 92.14       | 8.32  | 100.33   | 9.13  | 95.45     | 6.64 |
| 116 | Demeton-O                    |             |       |          |       |           |       | 87.00       | 7.00  | 97.58    | 11.48 | 97.15     | 3.57 |
| 117 | Demeton-S                    |             |       |          |       |           |       | 86.96       | 10.25 | 91.91    | 9.47  | 89.35     | 8.32 |
| 118 | Desethylterbutylazine        |             |       |          |       |           |       | 80.91       | 9.05  | 86.01    | 7.61  | 86.26     | 6.29 |
| 119 | Desmetryn                    |             |       |          |       |           |       | 87.78       | 8.60  | 95.11    | 8.45  | 96.28     | 4.17 |
| 120 | Diallate                     | 81.21       | 2.97  | 83.59    | 5.82  | 79.20     | 3.46  | 82.65       | 11.20 | 86.00    | 7.29  | 86.16     | 2.41 |
| 121 | Diazinon                     | 92.68       | 19.43 | 98.41    | 8.47  | 94.06     | 6.43  |             |       |          |       |           |      |
| 122 | Dibutyl succinate            | 97.13       | 2.17  | 97.15    | 4.96  | 90.43     | 3.43  |             |       |          |       |           |      |
| 123 | Dichlormid                   |             |       | 126.38   | 24.85 | 84.83     | 6.17  |             |       |          |       |           |      |
| 124 | Diclobutrazol                | 116.00      | 21.35 | 107.06   | 15.59 | 99.88     | 5.31  |             |       |          |       |           |      |
| 125 | Diclocymet                   | 96.25       | 2.89  | 93.00    | 4.87  | 88.92     | 2.83  |             |       |          |       |           |      |
| 126 | Diclosulam                   |             |       | 68.18    | 29.99 | 84.65     | 7.19  |             |       |          |       |           |      |
| 127 | Dicofol                      | 50.40       | 4.99  | 61.14    | 16.10 | 55.34     | 5.15  |             |       |          |       |           |      |
| 128 | Dieldrin                     |             |       |          |       |           |       | 95.65       | 4.12  | 94.16    | 3.80  | 91.22     | 2.12 |
| 129 | Diethyl-Ethyl                |             |       |          |       |           |       | 88.90       | 13.51 | 92.86    | 3.40  | 96.06     | 2.35 |
| 130 | Diethyl Aminoethyl Hexanoate | 18.53       | 10.13 | 17.13    | 9.85  | 16.18     | 1.52  |             |       |          |       |           |      |
| 131 | Diethyltoluamide             | 96.95       | 2.43  | 96.00    | 4.61  | 91.70     | 1.98  |             |       |          |       |           |      |
| 132 | Difenacoum                   | 56.50       | 6.28  | 52.40    | 7.09  | 47.50     | 4.64  |             |       |          |       |           |      |
| 133 | Difenoconazole               | 87.44       | 4.46  | 91.03    | 6.77  | 80.00     | 4.04  |             |       |          |       | 104.74    | 5.89 |
| 134 | Difenoxyuron                 | 96.06       | 1.72  | 94.32    | 3.58  | 89.71     | 2.79  |             |       |          |       |           |      |
| 135 | Diflufenican                 | 73.02       | 13.42 | 82.43    | 7.59  | 72.12     | 4.22  | 82.36       | 11.90 | 75.14    | 8.07  | 76.00     | 7.92 |
| 136 | Dimepiperate                 |             |       |          |       |           |       | 91.99       | 9.50  | 94.92    | 4.58  | 96.27     | 3.04 |
| 137 | Dimethachlon                 |             |       |          |       |           |       | 85.70       | 12.22 | 90.32    | 8.01  | 100.96    | 7.16 |
| 138 | Dimethachlor                 | 94.93       | 0.87  | 97.31    | 4.01  | 96.30     | 4.19  | 95.07       | 18.26 | 100.20   | 3.63  | 98.49     | 3.32 |
| 139 | Dimethametryn                | 89.82       | 3.89  | 91.39    | 5.90  | 86.26     | 4.75  | 85.28       | 6.88  | 90.32    | 3.64  | 85.49     | 2.56 |

| No. | Pesticides                 | GC-Q-TOF/MS |       |          |       |           |       | LC-Q-TOF/MS |       |          |       |           |       |
|-----|----------------------------|-------------|-------|----------|-------|-----------|-------|-------------|-------|----------|-------|-----------|-------|
|     |                            | 10 µg/kg    |       | 20 µg/kg |       | 100 µg/kg |       | 10 µg/kg    |       | 20 µg/kg |       | 100 µg/kg |       |
|     |                            | REC%        | RSD%  | REC%     | RSD%  | REC%      | RSD%  | REC%        | RSD%  | REC%     | RSD%  | REC%      | RSD%  |
| 140 | Dimethenamid               | 90.71       | 3.42  | 95.42    | 4.48  | 95.62     | 3.27  | 91.51       | 8.39  | 95.96    | 4.49  | 95.78     | 2.45  |
| 141 | Dimethomorph               | 91.54       | 5.70  | 91.66    | 8.13  | 92.35     | 4.16  |             |       | 94.91    | 8.56  | 104.34    | 6.70  |
| 142 | Dimethylvinphos (E)        | 96.95       | 6.04  | 91.15    | 3.91  | 95.38     | 5.00  | 79.19       | 15.51 | 94.36    | 10.35 | 86.57     | 8.75  |
| 143 | Dimethylvinphos (Z)        | 99.69       | 6.69  | 102.13   | 8.21  | 92.80     | 3.84  |             |       |          |       |           |       |
| 144 | Dimetilan                  | 103.55      | 9.74  | 92.45    | 5.46  | 81.77     | 2.99  | 85.47       | 11.76 | 91.56    | 7.79  | 92.92     | 6.57  |
| 145 | Dinitramine                | 83.85       | 18.37 | 86.35    | 18.92 | 97.98     | 7.86  | 105.28      | 8.91  | 109.74   | 2.93  | 100.41    | 8.88  |
| 146 | Dioxabenzofos              | 111.72      | 8.00  | 113.19   | 15.35 | 95.99     | 4.11  | 89.01       | 9.53  | 102.81   | 10.97 | 96.43     | 6.59  |
| 147 | Dioxacarb                  |             |       |          |       | 74.63     | 7.14  |             |       | 95.55    | 21.08 | 91.50     | 13.09 |
| 148 | Dioxathion                 |             |       |          |       |           |       |             |       | 86.71    | 56.29 | 91.70     | 12.03 |
| 149 | Diphenamid                 | 96.23       | 3.02  | 99.61    | 5.14  | 95.62     | 3.48  | 91.69       | 6.46  | 95.97    | 7.89  | 93.21     | 3.19  |
| 150 | Dipropetryn                | 91.48       | 3.49  | 93.84    | 6.26  | 87.86     | 4.44  | 92.28       | 4.54  | 90.30    | 6.76  | 90.02     | 2.88  |
| 151 | Dipropyl Isocinchomeronate | 92.30       | 5.80  | 91.89    | 7.83  | 89.80     | 5.21  | 80.59       | 15.82 | 79.23    | 18.11 | 103.47    | 4.62  |
| 152 | Dithiopyr                  | 115.66      | 13.49 | 106.12   | 4.70  | 91.72     | 1.90  | 92.18       | 3.24  | 96.29    | 5.54  | 99.35     | 2.07  |
| 153 | DMST                       | 66.36       | 20.75 | 133.92   | 6.97  | 97.66     | 3.15  |             |       |          |       |           |       |
| 154 | Dodemorph                  | 27.66       | 8.03  | 27.12    | 11.02 | 26.41     | 6.28  | 27.66       | 8.25  | 28.75    | 5.9   | 28.56     | 3.57  |
| 155 | Drazoxolon                 | 44.45       | 9.13  | 45.30    | 14.48 | 44.67     | 9.70  |             |       |          |       |           |       |
| 156 | Endosulfan-sulfate         |             |       |          |       |           |       | 84.61       | 20.61 | 111.22   | 7.28  | 100.88    | 1.63  |
| 157 | Enestroburin               | 112.40      | 22.87 | 82.25    | 6.56  | 79.98     | 7.59  |             |       |          |       | 96.63     | 10.60 |
| 158 | EPN                        | 67.32       | 9.55  | 70.93    | 9.60  | 64.21     | 5.62  |             |       |          |       | 97.16     | 12.99 |
| 159 | Epoxiconazole              | 90.08       | 4.54  | 95.66    | 7.31  | 88.18     | 4.11  | 86.00       | 17.73 | 84.51    | 13.46 | 83.89     | 5.28  |
| 160 | Eprinomectin B1b           | 64.93       | 9.23  | 76.23    | 9.81  | 69.84     | 1.85  |             |       |          |       |           |       |
| 161 | EPTC                       | 67.32       | 35.12 | 81.31    | 5.57  | 109.76    | 16.49 | 91.97       | 3.00  | 95.04    | 4.53  | 93.95     | 3.26  |
| 162 | Esprocarb                  | 102.97      | 2.93  | 96.53    | 4.05  | 88.91     | 2.30  | 99.69       | 8.11  | 101.42   | 6.12  | 95.98     | 3.06  |
| 163 | Etaconazole                | 89.41       | 4.57  | 93.07    | 6.78  | 88.86     | 4.44  | 86.34       | 6.71  | 86.61    | 9.06  | 85.91     | 5.70  |
| 164 | Ethiofencarb               | 85.17       | 7.81  | 79.29    | 17.97 | 76.46     | 15.17 |             |       |          |       |           |       |
| 165 | Ethiofencarb-sulfone       | 93.10       | 16.14 | 97.10    | 8.60  | 88.70     | 1.72  |             |       |          |       |           |       |
| 166 | Ethiofencarb-sulfoxide     | 85.37       | 11.47 | 89.29    | 9.31  | 88.79     | 3.54  |             |       |          |       |           |       |
| 167 | Ethiolate                  |             |       |          |       |           |       | 94.80       | 5.60  | 95.43    | 3.90  | 91.64     | 2.81  |

| No. | Pesticides           | GC-Q-TOF/MS |       |          |       |           |       | LC-Q-TOF/MS |       |          |       |           |       |
|-----|----------------------|-------------|-------|----------|-------|-----------|-------|-------------|-------|----------|-------|-----------|-------|
|     |                      | 10 µg/kg    |       | 20 µg/kg |       | 100 µg/kg |       | 10 µg/kg    |       | 20 µg/kg |       | 100 µg/kg |       |
|     |                      | REC%        | RSD%  | REC%     | RSD%  | REC%      | RSD%  | REC%        | RSD%  | REC%     | RSD%  | REC%      | RSD%  |
| 168 | Ethofumesate         |             |       |          |       |           |       | 99.24       | 3.91  | 101.73   | 6.20  | 98.06     | 3.20  |
| 169 | Ethoprophos          | 94.45       | 2.49  | 99.49    | 5.88  | 93.02     | 3.59  | 84.67       | 12.25 | 103.72   | 1.95  | 98.46     | 5.44  |
| 170 | Ethoxyquin           |             |       |          |       |           |       | 82.97       | 9.95  | 94.41    | 6.52  | 84.78     | 4.90  |
| 171 | ethychlozate         | 92.05       | 6.34  | 90.40    | 4.85  | 88.44     | 1.57  |             |       | 85.19    | 13.13 | 96.28     | 6.49  |
| 172 | Etofenprox           | 94.25       | 7.29  | 111.55   | 13.95 | 91.95     | 6.61  | 84.45       | 7.15  | 89.41    | 9.90  | 91.35     | 5.65  |
| 173 | Etozazole            | 95.34       | 3.67  | 93.67    | 5.34  | 88.38     | 3.71  | 97.41       | 6.39  | 96.04    | 10.27 | 93.21     | 5.16  |
| 174 | Etrimfos             | 96.38       | 4.11  | 93.95    | 5.20  | 89.77     | 4.41  |             |       |          |       |           |       |
| 175 | Eugenol              |             |       |          |       |           |       | 105.37      | 11.06 | 96.74    | 6.70  | 101.56    | 5.51  |
| 176 | Famphur              | 93.15       | 2.67  | 99.13    | 2.91  | 93.20     | 2.70  |             |       | 95.72    | 7.59  | 87.27     | 7.91  |
| 177 | Fenamidone           | 95.27       | 3.01  | 97.49    | 4.34  | 94.05     | 3.70  | 85.86       | 9.43  | 97.18    | 10.44 | 91.32     | 5.45  |
| 178 | Fenamiphos           | 86.08       | 3.76  | 90.06    | 6.61  | 86.79     | 4.64  | 87.99       | 14.70 | 89.31    | 10.67 | 89.56     | 8.52  |
| 179 | Fenamiphos-sulfone   | 94.13       | 4.44  | 95.14    | 5.11  | 94.36     | 3.54  |             |       |          |       |           |       |
| 180 | Fenamiphos-sulfoxide | 85.53       | 4.40  | 80.21    | 7.79  | 77.78     | 4.11  |             |       | 101.48   | 13.11 | 83.08     | 10.05 |
| 181 | Fenazaquin           | 59.64       | 4.42  | 58.48    | 8.69  | 53.06     | 4.14  | 73.76       | 11.65 | 70.98    | 8.95  | 64.19     | 6.75  |
| 182 | Fenchlorphos         |             |       |          |       |           |       | 78.03       | 10.14 | 72.02    | 7.93  | 76.01     | 2.73  |
| 183 | Fenchlorphos-Oxon    | 100.91      | 8.31  | 93.01    | 6.35  | 88.17     | 1.37  | 75.16       | 29.19 | 107.17   | 13.95 | 94.93     | 6.43  |
| 184 | Fenfuram             | 89.97       | 2.54  | 98.77    | 2.92  | 91.54     | 2.74  | 82.90       | 19.17 | 103.59   | 12.54 | 101.26    | 6.63  |
| 185 | Fenhexamid           | 91.20       | 4.64  | 91.93    | 6.10  | 83.46     | 3.79  |             |       |          |       | 89.36     | 9.43  |
| 186 | Fenoprop             |             |       |          |       |           |       |             |       |          |       | 93.75     | 15.54 |
| 187 | Fenothiocarb         | 96.60       | 3.82  | 96.48    | 5.65  | 91.16     | 3.41  | 85.25       | 16.52 | 88.78    | 11.68 | 90.39     | 7.15  |
| 188 | Fenoxaprop-Ethyl     | 92.61       | 2.92  | 90.57    | 6.13  | 82.57     | 4.52  | 74.45       | 16.88 | 87.35    | 7.83  | 91.93     | 9.90  |
| 189 | Fenoxaprop-P         |             |       | 6.54     | 24.77 | 8.32      | 12.82 |             |       |          |       |           |       |
| 190 | Fenoxasulfone        |             |       |          |       |           |       | 92.92       | 7.23  | 97.10    | 11.42 | 99.28     | 9.64  |
| 191 | Fenoxycarb           | 100.81      | 4.91  | 98.60    | 7.80  | 95.40     | 3.45  |             |       |          |       | 84.23     | 8.70  |
| 192 | Fenpropidin          | 19.08       | 10.03 | 19.57    | 13.82 | 18.84     | 8.43  | 20.21       | 9.09  | 19.07    | 5.52  | 18.16     | 7.04  |
| 193 | Fenpropimorph        |             |       |          |       |           |       | 45.31       | 3.91  | 43.67    | 3.93  | 43.34     | 4.68  |
| 194 | Fenpyrazamine        | 91.10       | 4.92  | 95.94    | 6.93  | 95.37     | 3.90  |             |       | 96.99    | 6.87  | 100.28    | 4.34  |
| 195 | Fensulfothion        |             |       |          |       |           |       | 93.76       | 17.21 | 82.29    | 9.16  | 91.28     | 9.84  |

| No. | Pesticides                 | GC-Q-TOF/MS |       |          |       |           |       | LC-Q-TOF/MS |       |          |       |           |       |
|-----|----------------------------|-------------|-------|----------|-------|-----------|-------|-------------|-------|----------|-------|-----------|-------|
|     |                            | 10 µg/kg    |       | 20 µg/kg |       | 100 µg/kg |       | 10 µg/kg    |       | 20 µg/kg |       | 100 µg/kg |       |
|     |                            | REC%        | RSD%  | REC%     | RSD%  | REC%      | RSD%  | REC%        | RSD%  | REC%     | RSD%  | REC%      | RSD%  |
| 196 | Fensulfothion-Oxon-Sulfone | 104.08      | 3.46  | 92.47    | 5.06  | 94.49     | 1.84  |             |       |          |       |           |       |
| 197 | Fensulfothion-sulfone      |             |       |          |       |           |       | 81.72       | 11.34 | 99.49    | 6.44  | 103.19    | 5.14  |
| 198 | fentin hydroxide           |             |       |          |       |           |       | 89.96       | 27.00 | 72.81    | 10.92 | 87.59     | 6.50  |
| 199 | Fentrazamide               | 101.58      | 6.95  | 98.11    | 2.66  | 90.68     | 3.03  |             |       |          |       |           |       |
| 200 | Fenuron                    | 124.67      | 22.40 | 89.29    | 7.82  | 82.07     | 4.57  |             |       |          |       |           |       |
| 201 | Ferimzone                  | 77.63       | 3.83  | 82.03    | 6.48  | 76.16     | 4.07  | 78.54       | 10.94 | 88.62    | 15.41 | 81.95     | 6.77  |
| 202 | Fipronil                   |             |       |          |       |           |       | 88.40       | 9.50  | 94.51    | 4.97  | 93.50     | 3.33  |
| 203 | Fipronil Desulfinyl        |             |       |          |       |           |       | 92.84       | 5.71  | 84.79    | 7.19  | 83.85     | 3.25  |
| 204 | Fipronil-sulfide           |             |       |          |       |           |       | 101.49      | 8.78  | 93.78    | 5.59  | 98.42     | 2.56  |
| 205 | Fipronil-sulfone           |             |       |          |       |           |       | 97.93       | 4.53  | 90.30    | 7.12  | 93.40     | 5.47  |
| 206 | Flamprop-isopropyl         | 95.65       | 3.47  | 99.32    | 3.92  | 92.94     | 3.58  | 93.85       | 7.30  | 95.46    | 6.17  | 92.35     | 3.24  |
| 207 | Flamprop-methyl            |             |       |          |       |           |       | 92.85       | 5.45  | 93.96    | 5.52  | 94.58     | 3.12  |
| 208 | Flonicamid                 |             |       |          |       | 78.87     | 10.16 | 84.51       | 19.77 | 88.24    | 7.55  | 91.70     | 6.05  |
| 209 | Florasulam                 | 55.93       | 4.37  | 49.19    | 8.08  | 48.26     | 3.86  |             |       |          |       |           |       |
| 210 | Fluacrypyrim               | 96.22       | 4.85  | 98.70    | 5.12  | 91.71     | 2.80  | 101.41      | 6.74  | 92.37    | 8.36  | 94.49     | 3.63  |
| 211 | Fluazifop                  | 12.34       | 26.18 | 13.48    | 20.71 | 13.11     | 7.87  | 80.16       | 31.06 | 81.72    | 8.82  | 87.41     | 6.20  |
| 212 | Fluazifop-butyl            | 100.84      | 2.28  | 98.70    | 3.53  | 91.51     | 2.30  | 93.10       | 11.37 | 96.42    | 8.79  | 98.30     | 3.97  |
| 213 | Fluazuron                  | 85.98       | 10.88 | 80.90    | 8.87  | 76.47     | 3.97  | 109.67      | 2.63  | 91.34    | 8.76  | 74.79     | 4.08  |
| 214 | Flubenzimine               | 67.76       | 9.32  | 60.15    | 10.41 | 60.44     | 6.78  |             |       |          |       |           |       |
| 215 | Flucarbazone               | 6.31        | 9.26  | 5.53     | 26.32 | 5.37      | 6.73  |             |       |          |       |           |       |
| 216 | Flucetosulfuron            | 58.89       | 7.99  | 60.25    | 11.28 | 58.78     | 7.89  |             |       |          |       |           |       |
| 217 | Flucycloxauron             | 36.78       | 9.52  | 37.06    | 13.85 | 33.05     | 8.73  |             |       |          |       |           |       |
| 218 | Fluensulfone               |             |       |          |       |           |       | 87.56       | 9.01  | 110.32   | 8.70  | 92.68     | 5.80  |
| 219 | Flufenacet                 | 96.02       | 3.06  | 103.94   | 7.40  | 94.49     | 3.97  | 87.97       | 16.89 | 105.00   | 8.91  | 99.70     | 4.54  |
| 220 | Flufenoxuron               | 107.84      | 12.40 | 89.40    | 10.67 | 92.90     | 7.48  | 100.10      | 8.06  | 86.66    | 5.26  | 83.31     | 2.65  |
| 221 | Flufenpyr-Ethyl            | 101.92      | 2.97  | 100.93   | 4.99  | 93.49     | 3.77  |             |       |          |       |           |       |
| 222 | Flufiprole                 | 113.17      | 18.62 | 90.65    | 11.19 | 88.07     | 1.40  | 98.76       | 3.09  | 102.48   | 7.16  | 95.01     | 2.72  |
| 223 | Flumetralin                |             |       |          |       | 89.84     | 7.11  |             |       | 103.17   | 18.77 | 103.35    | 11.95 |

| No. | Pesticides              | GC-Q-TOF/MS |       |          |       |           |       | LC-Q-TOF/MS |       |          |      |           |       |
|-----|-------------------------|-------------|-------|----------|-------|-----------|-------|-------------|-------|----------|------|-----------|-------|
|     |                         | 10 µg/kg    |       | 20 µg/kg |       | 100 µg/kg |       | 10 µg/kg    |       | 20 µg/kg |      | 100 µg/kg |       |
|     |                         | REC%        | RSD%  | REC%     | RSD%  | REC%      | RSD%  | REC%        | RSD%  | REC%     | RSD% | REC%      | RSD%  |
| 224 | Flumetsulam             | 68.80       | 5.76  | 62.64    | 5.64  | 62.02     | 2.70  |             |       |          |      |           |       |
| 225 | Flumiclorac-Pentyl      | 95.94       | 4.65  | 93.78    | 5.48  | 87.94     | 2.47  |             |       |          |      |           |       |
| 226 | Flumioxazin             |             |       | 92.52    | 39.04 | 95.19     | 10.35 |             |       |          |      | 93.27     | 11.29 |
| 227 | Fluopyram               | 99.56       | 3.10  | 98.65    | 5.28  | 93.46     | 3.63  | 88.64       | 12.01 | 94.09    | 6.96 | 94.25     | 4.31  |
| 228 | Fluoroglycofen-ethyl    |             |       |          |       | 67.68     | 3.48  |             |       |          |      | 87.45     | 7.12  |
| 229 | Fluotrimazole           |             |       |          |       |           |       | 99.74       | 12.77 | 85.81    | 7.53 | 91.52     | 5.08  |
| 230 | Fluquinconazole         | 81.46       | 6.70  | 95.07    | 6.19  | 93.08     | 2.08  | 88.87       | 6.64  | 87.26    | 7.43 | 89.42     | 6.45  |
| 231 | Flurochloridone         | 95.95       | 18.66 | 101.30   | 9.29  | 93.51     | 7.04  | 80.36       | 8.62  | 102.78   | 3.63 | 104.17    | 5.92  |
| 232 | fluroxypyr-meptyl       | 108.06      | 11.49 | 83.10    | 11.83 | 67.17     | 3.23  | 75.52       | 10.78 | 87.32    | 9.04 | 91.53     | 7.47  |
| 233 | Flurprimidol            | 89.16       | 3.37  | 99.17    | 4.14  | 92.47     | 2.34  | 89.56       | 6.70  | 92.93    | 4.31 | 92.29     | 3.62  |
| 234 | Flusilazole             | 95.98       | 2.60  | 96.69    | 5.01  | 91.06     | 3.14  | 86.75       | 8.63  | 91.19    | 5.81 | 92.51     | 4.52  |
| 235 | Flutolanil              | 98.02       | 2.98  | 100.09   | 6.49  | 94.43     | 4.04  | 82.83       | 8.70  | 95.10    | 6.21 | 96.79     | 3.03  |
| 236 | Flutriafol              | 98.88       | 8.61  | 92.18    | 2.92  | 94.55     | 3.75  | 85.95       | 5.24  | 84.89    | 4.41 | 88.15     | 2.59  |
| 237 | Fluxapyroxad            | 97.46       | 2.64  | 99.33    | 4.24  | 95.54     | 3.89  | 91.14       | 9.15  | 82.50    | 4.01 | 87.55     | 8.05  |
| 238 | Fonofos                 | 104.74      | 30.65 | 77.09    | 15.95 | 92.59     | 8.81  | 89.86       | 4.95  | 96.22    | 7.84 | 96.32     | 3.14  |
| 239 | Foramsulfuron           | 45.04       | 11.05 | 46.41    | 8.50  | 41.19     | 4.44  |             |       |          |      |           |       |
| 240 | Formetanate             | 9.79        | 28.83 | 18.6     | 14.6  | 14        | 8.98  |             |       |          |      |           |       |
| 241 | Fuberidazole            | 75.80       | 3.65  | 72.69    | 4.16  | 65.11     | 3.50  |             |       |          |      |           |       |
| 242 | Furalaxyl               | 99.31       | 4.04  | 98.93    | 5.23  | 92.93     | 3.38  | 76.10       | 5.08  | 65.31    | 5.34 | 62.52     | 2.09  |
| 243 | furametpyr              |             |       |          |       |           |       | 74.01       | 12.32 | 81.48    | 8.20 | 85.20     | 4.22  |
| 244 | Furathiocarb            | 94.49       | 2.95  | 99.02    | 4.47  | 91.02     | 3.18  | 73.61       | 25.27 | 108.53   | 8.71 | 102.78    | 9.90  |
| 245 | Furilazole              |             |       |          |       |           |       | 89.56       | 8.68  | 100.22   | 7.25 | 103.68    | 6.02  |
| 246 | Furmecyclox             | 90.69       | 3.47  | 94.62    | 6.19  | 86.78     | 3.83  | 89.15       | 8.60  | 95.67    | 5.29 | 87.74     | 5.59  |
| 247 | Griseofulvin            | 93.70       | 2.09  | 96.50    | 5.17  | 91.06     | 3.39  | 89.26       | 16.05 | 103.16   | 7.01 | 93.51     | 4.19  |
| 248 | Halofenozide            | 91.66       | 3.46  | 95.86    | 4.38  | 96.71     | 4.06  |             |       |          |      |           |       |
| 249 | Halosulfuron-methyl     | 39.89       | 9.73  | 41.46    | 14.70 | 38.21     | 7.73  |             |       |          |      |           |       |
| 250 | Haloxypop               |             |       |          |       | 10.94     | 33.12 | 93.39       | 10.02 | 97.19    | 7.23 | 93.67     | 3.01  |
| 251 | Haloxypop-2-ethoxyethyl | 99.78       | 5.84  | 97.66    | 4.05  | 89.03     | 1.98  | 94.71       | 10.36 | 102.03   | 9.29 | 95.74     | 7.25  |

| No. | Pesticides            | GC-Q-TOF/MS |       |          |       |           |       | LC-Q-TOF/MS |       |          |       |           |       |
|-----|-----------------------|-------------|-------|----------|-------|-----------|-------|-------------|-------|----------|-------|-----------|-------|
|     |                       | 10 µg/kg    |       | 20 µg/kg |       | 100 µg/kg |       | 10 µg/kg    |       | 20 µg/kg |       | 100 µg/kg |       |
|     |                       | REC%        | RSD%  | REC%     | RSD%  | REC%      | RSD%  | REC%        | RSD%  | REC%     | RSD%  | REC%      | RSD%  |
| 252 | Haloxypop-methyl      | 96.16       | 5.54  | 95.05    | 3.14  | 90.36     | 2.82  | 93.39       | 10.02 | 97.19    | 7.23  | 93.67     | 3.01  |
| 253 | Hexazinone            | 99.12       | 2.88  | 95.89    | 3.93  | 90.64     | 2.70  |             |       | 82.35    | 9.14  | 86.75     | 5.77  |
| 254 | Hydroprene            | 110.46      | 12.66 | 61.57    | 10.58 | 84.23     | 7.42  |             |       |          |       |           |       |
| 255 | Imazamethabenz-methyl | 94.32       | 2.18  | 93.52    | 4.85  | 89.76     | 3.24  | 110.98      | 15.18 | 92.31    | 7.42  | 87.94     | 4.94  |
| 256 | Imazosulfuron         | 54.81       | 3.92  | 52.67    | 11.42 | 52.44     | 7.25  |             |       |          |       |           |       |
| 257 | Imibenconazole        | 66.56       | 4.73  | 66.23    | 6.23  | 58.38     | 4.80  |             |       |          |       |           |       |
| 258 | Imicyafos             | 91.39       | 3.74  | 93.30    | 6.43  | 90.52     | 3.62  |             |       |          |       |           |       |
| 259 | Imidaclothiz          | 92.69       | 19.21 | 85.07    | 10.28 | 81.94     | 7.01  |             |       |          |       |           |       |
| 260 | Imiprothrin           | 89.69       | 2.24  | 96.77    | 7.33  | 91.10     | 3.96  |             |       |          |       |           |       |
| 261 | Inabenfide            | 39.49       | 9.12  | 45.79    | 10.47 | 40.92     | 6.59  |             |       |          |       |           |       |
| 262 | Indanofan             | 107.47      | 13.06 | 109.82   | 11.13 | 103.19    | 1.70  | 83.80       | 13.97 | 94.08    | 11.43 | 93.29     | 5.66  |
| 263 | Indaziflam            |             |       |          |       |           |       | 93.05       | 16.12 | 92.42    | 12.28 | 85.68     | 9.62  |
| 264 | Iodofenphos           |             |       |          |       |           |       | 67.37       | 16.11 | 88.84    | 8.41  | 82.49     | 3.86  |
| 265 | Iodosulfuron-methyl   | 29.92       | 14.10 | 33.75    | 15.92 | 32.84     | 11.80 |             |       |          |       |           |       |
| 266 | Ipconazole            | 85.71       | 17.35 | 78.81    | 7.48  | 86.99     | 3.55  |             |       |          |       | 69.28     | 12.33 |
| 267 | Ipfencarbazone        |             |       |          |       |           |       |             |       | 97.01    | 12.47 | 108.03    | 4.25  |
| 268 | Iprodione             |             |       |          |       | 98.21     | 16.27 |             |       | 91.67    | 14.89 | 100.55    | 5.52  |
| 269 | Isazofos              | 97.22       | 3.27  | 100.31   | 5.32  | 92.08     | 3.44  | 90.28       | 6.34  | 94.52    | 4.27  | 93.59     | 3.05  |
| 270 | Isocarbamid           | 99.06       | 9.96  | 85.38    | 5.31  | 85.12     | 1.32  | 81.98       | 15.26 | 90.83    | 5.26  | 94.38     | 6.82  |
| 271 | isocarbophos          |             |       |          |       |           |       | 85.00       | 14.38 | 102.62   | 5.49  | 101.94    | 4.08  |
| 272 | Isofenphos-Methyl     |             |       |          |       |           |       | 80.73       | 13.91 | 109.82   | 7.28  | 98.73     | 4.79  |
| 273 | Isomethiozin          | 79.07       | 3.27  | 77.54    | 5.53  | 80.49     | 3.85  | 72.82       | 3.99  | 72.19    | 4.51  | 73.98     | 3.28  |
| 274 | Isoproc carb          | 95.86       | 11.52 | 106.89   | 11.23 | 98.24     | 4.92  | 99.73       | 16.48 | 110.89   | 6.71  | 105.35    | 7.06  |
| 275 | Isopropalin           | 119.30      | 9.07  | 90.15    | 10.27 | 83.98     | 4.28  | 91.04       | 8.27  | 121.31   | 9.25  | 104.39    | 8.57  |
| 276 | Isoprothiolane        | 97.65       | 4.74  | 101.60   | 5.38  | 95.69     | 3.21  | 92.84       | 10.13 | 88.66    | 5.33  | 88.35     | 2.29  |
| 277 | Isoproturon           | 94.13       | 2.69  | 97.42    | 3.91  | 91.96     | 2.49  |             |       |          |       |           |       |
| 278 | Isopyrazam            |             |       |          |       |           |       | 92.99       | 10.20 | 93.30    | 8.01  | 91.25     | 5.92  |
| 279 | Isoxadifen-ethyl      | 95.81       | 4.67  | 94.11    | 4.96  | 94.25     | 3.42  | 90.80       | 8.48  | 96.40    | 7.21  | 93.28     | 3.44  |

| No. | Pesticides              | GC-Q-TOF/MS |       |          |       |           |       | LC-Q-TOF/MS |       |          |       |           |       |
|-----|-------------------------|-------------|-------|----------|-------|-----------|-------|-------------|-------|----------|-------|-----------|-------|
|     |                         | 10 µg/kg    |       | 20 µg/kg |       | 100 µg/kg |       | 10 µg/kg    |       | 20 µg/kg |       | 100 µg/kg |       |
|     |                         | REC%        | RSD%  | REC%     | RSD%  | REC%      | RSD%  | REC%        | RSD%  | REC%     | RSD%  | REC%      | RSD%  |
| 280 | Isoxaflutole            |             |       |          |       | 90.08     | 5.87  | 79.29       | 7.44  | 88.45    | 7.21  | 77.98     | 6.64  |
| 281 | Karbutilate             | 93.34       | 4.75  | 96.20    | 6.33  | 92.25     | 3.52  |             |       |          |       |           |       |
| 282 | Lenacil                 |             |       |          |       |           |       |             |       |          |       | 88.50     | 5.31  |
| 283 | Lindane                 |             |       |          |       |           |       | 88.40       | 9.67  | 104.41   | 5.37  | 87.64     | 6.59  |
| 284 | Maleic hydrazide        | 95.60       | 4.01  | 95.11    | 3.45  | 92.12     | 2.02  |             |       |          |       |           |       |
| 285 | MCPA-2-ETHYLHEXYL ESTER |             |       |          |       |           |       | 82.96       | 8.06  | 85.22    | 5.41  | 84.10     | 2.60  |
| 286 | MCPA-isooctyl           |             |       |          |       |           |       | 78.18       | 12.45 | 85.61    | 8.31  | 85.82     | 4.90  |
| 287 | Mecarbam                |             |       |          |       |           |       | 85.39       | 10.78 | 95.72    | 5.97  | 95.97     | 2.59  |
| 288 | Mefenacet               | 90.91       | 3.64  | 94.34    | 6.26  | 88.17     | 3.63  |             |       |          |       | 90.43     | 11.51 |
| 289 | Mefenpyr-diethyl        | 93.66       | 2.57  | 98.07    | 5.12  | 93.13     | 3.66  | 88.75       | 15.96 | 89.63    | 9.04  | 96.02     | 3.27  |
| 290 | Mepanipyrim             | 41.30       | 8.86  | 42.27    | 16.42 | 39.15     | 7.56  | 40.18       | 7.31  | 42.83    | 16.65 | 40.95     | 8.66  |
| 291 | Mepronil                | 98.15       | 3.12  | 98.86    | 6.60  | 93.27     | 4.26  | 85.20       | 10.46 | 94.38    | 7.02  | 97.23     | 8.18  |
| 292 | Metaflumizone           | 40.92       | 16.82 | 47.28    | 18.58 | 44.68     | 14.16 |             |       |          |       |           |       |
| 293 | Metaxyl                 | 97.78       | 0.99  | 97.39    | 5.55  | 92.44     | 2.94  | 85.95       | 7.10  | 77.80    | 5.93  | 77.33     | 2.63  |
| 294 | Metamifop               | 81.57       | 3.15  | 80.63    | 6.08  | 74.25     | 4.53  |             |       |          |       |           |       |
| 295 | Metamitron              | 76.72       | 11.22 | 90.22    | 2.46  | 82.16     | 1.50  |             |       |          |       |           |       |
| 296 | Metazachlor             | 100.98      | 2.06  | 97.57    | 5.84  | 94.80     | 3.31  | 89.50       | 14.42 | 93.30    | 2.82  | 98.13     | 5.59  |
| 297 | Metconazole             | 87.51       | 3.68  | 91.20    | 5.00  | 83.75     | 3.57  | 88.31       | 8.94  | 87.45    | 12.67 | 80.69     | 4.41  |
| 298 | Methabenzthiazuron      | 83.77       | 8.69  | 74.09    | 6.02  | 69.24     | 3.10  | 86.81       | 12.06 | 95.20    | 8.34  | 81.79     | 6.25  |
| 299 | Methacrifos             |             |       |          |       |           |       | 87.62       | 11.45 | 96.35    | 9.34  | 99.79     | 3.12  |
| 300 | Methamidophos           |             |       | 113.73   | 15.10 | 72.02     | 8.66  |             |       |          |       |           |       |
| 301 | Methfuroxam             | 88.20       | 4.38  | 91.09    | 2.88  | 85.38     | 2.00  | 90.11       | 12.08 | 91.90    | 6.00  | 82.66     | 3.27  |
| 302 | Methoprotryne           | 83.72       | 3.28  | 86.33    | 8.07  | 83.07     | 4.60  | 81.26       | 4.91  | 88.24    | 9.55  | 86.00     | 4.99  |
| 303 | Metobromuron            | 108.01      | 1.18  | 104.27   | 4.43  | 92.79     | 1.60  |             |       |          |       | 100.96    | 7.76  |
| 304 | Metrafenone             |             |       |          |       |           |       | 82.16       | 9.98  | 85.21    | 11.51 | 88.34     | 4.22  |
| 305 | Metribuzin              | 163.91      | 4.54  | 120.77   | 5.24  | 109.73    | 1.08  | 91.45       | 9.78  | 109.35   | 10.40 | 105.67    | 7.40  |
| 306 | Metsulfuron-Methyl      | 49.30       | 6.78  | 51.73    | 12.02 | 48.73     | 7.65  |             |       |          |       |           |       |
| 307 | Mexacarbate             | 91.95       | 10.96 | 89.17    | 2.54  | 82.33     | 1.59  | 98.48       | 8.39  | 111.31   | 3.68  | 103.43    | 6.11  |

| No. | Pesticides            | GC-Q-TOF/MS |       |          |       |           |       | LC-Q-TOF/MS |       |          |       |           |       |
|-----|-----------------------|-------------|-------|----------|-------|-----------|-------|-------------|-------|----------|-------|-----------|-------|
|     |                       | 10 µg/kg    |       | 20 µg/kg |       | 100 µg/kg |       | 10 µg/kg    |       | 20 µg/kg |       | 100 µg/kg |       |
|     |                       | REC%        | RSD%  | REC%     | RSD%  | REC%      | RSD%  | REC%        | RSD%  | REC%     | RSD%  | REC%      | RSD%  |
| 308 | Molinate              | 74.40       | 6.46  | 69.29    | 13.24 | 76.90     | 7.26  | 87.29       | 13.46 | 101.58   | 3.92  | 97.15     | 2.56  |
| 309 | Monalide              | 99.64       | 5.73  | 96.57    | 8.02  | 93.16     | 2.53  | 87.78       | 9.81  | 88.53    | 8.68  | 98.23     | 5.30  |
| 310 | Monocrotophos         | 73.13       | 7.40  | 85.24    | 5.02  | 86.18     | 2.90  |             |       |          |       |           |       |
| 311 | Monolinuron           | 93.46       | 2.65  | 95.36    | 5.79  | 97.44     | 3.20  |             |       | 92.13    | 6.34  | 95.42     | 8.96  |
| 312 | Monuron               | 95.17       | 2.86  | 96.40    | 2.29  | 86.23     | 1.60  |             |       |          |       |           |       |
| 313 | Musk Ketone           |             |       |          |       |           |       | 100.23      | 4.40  | 97.84    | 6.34  | 97.97     | 2.32  |
| 314 | Musk Moskene          |             |       |          |       |           |       | 102.67      | 2.99  | 113.29   | 7.20  | 102.40    | 7.03  |
| 315 | Musk Tibetene         |             |       |          |       |           |       | 91.22       | 4.53  | 93.10    | 6.04  | 90.11     | 3.57  |
| 316 | Myclobutanil          | 91.68       | 3.74  | 98.63    | 8.45  | 93.11     | 4.63  | 89.13       | 5.60  | 90.92    | 8.96  | 89.96     | 4.34  |
| 317 | Naphthalophos         | 39.56       | 10.15 | 42.29    | 16.73 | 39.48     | 10.52 |             |       |          |       |           |       |
| 318 | Neburon               | 92.78       | 3.79  | 92.77    | 6.26  | 85.04     | 3.87  |             |       |          |       |           |       |
| 319 | Nitrapyrin            |             |       |          |       |           |       | 86.92       | 11.89 | 92.89    | 9.04  | 101.38    | 4.20  |
| 320 | Nitrofen              |             |       |          |       |           |       | 110.32      | 18.98 | 152.09   | 21.70 | 105.98    | 6.71  |
| 321 | Nitrothal-Isopropyl   |             |       |          |       |           |       | 98.38       | 13.54 | 132.52   | 10.95 | 102.22    | 6.95  |
| 322 | Norflurazon           | 95.24       | 1.50  | 96.01    | 3.73  | 90.83     | 2.68  | 93.08       | 14.28 | 99.27    | 7.91  | 96.06     | 7.82  |
| 323 | Noruron               | 88.11       | 1.37  | 90.83    | 6.02  | 86.83     | 4.69  | 90.32       | 7.98  | 80.18    | 5.94  | 87.21     | 3.59  |
| 324 | Novaluron             |             |       |          |       | 80.55     | 13.43 |             |       | 81.32    | 9.09  | 89.02     | 6.54  |
| 325 | Noviflumuron          |             |       |          |       |           |       | 92.31       | 7.68  | 83.60    | 8.55  | 86.92     | 8.15  |
| 326 | Nuarimol              |             |       | 81.94    | 13.44 | 86.50     | 10.43 | 82.00       | 11.65 | 80.97    | 6.42  | 89.81     | 3.48  |
| 327 | Octhilinone           |             |       |          |       |           |       | 23.31       | 27.59 | 35.25    | 15.20 | 30.53     | 10.44 |
| 328 | Ofurace               | 94.00       | 1.62  | 100.08   | 3.77  | 96.41     | 2.74  |             |       |          |       |           |       |
| 329 | Orbencarb             | 93.85       | 5.14  | 101.09   | 3.93  | 88.79     | 3.87  | 93.83       | 8.94  | 100.21   | 5.83  | 93.25     | 3.68  |
| 330 | Ortho-Dichlorobenzene |             |       |          |       |           |       | 89.09       | 19.70 | 77.73    | 6.76  | 84.57     | 5.90  |
| 331 | Orysastrobin          |             |       |          |       |           |       | 66.16       | 10.71 | 73.96    | 7.34  | 76.61     | 7.00  |
| 332 | Oxadiargyl            |             |       |          |       | 88.51     | 9.94  |             |       |          |       |           |       |
| 333 | oxadiazon             |             |       |          |       | 89.37     | 3.18  | 95.40       | 6.23  | 92.16    | 4.02  | 92.13     | 2.43  |
| 334 | Oxadixyl              | 97.87       | 1.03  | 98.40    | 3.91  | 92.90     | 2.76  |             |       | 76.48    | 11.80 | 101.54    | 10.96 |
| 335 | Oxasulfuron           | 81.19       | 2.93  | 78.99    | 4.55  | 76.91     | 3.21  |             |       |          |       |           |       |



| No. | Pesticides                        | GC-Q-TOF/MS |       |          |       |           |      | LC-Q-TOF/MS |       |          |       |           |       |
|-----|-----------------------------------|-------------|-------|----------|-------|-----------|------|-------------|-------|----------|-------|-----------|-------|
|     |                                   | 10 µg/kg    |       | 20 µg/kg |       | 100 µg/kg |      | 10 µg/kg    |       | 20 µg/kg |       | 100 µg/kg |       |
|     |                                   | REC%        | RSD%  | REC%     | RSD%  | REC%      | RSD% | REC%        | RSD%  | REC%     | RSD%  | REC%      | RSD%  |
| 336 | Oxycarboxin                       | 101.12      | 11.14 | 91.97    | 3.42  | 95.47     | 1.75 |             |       |          |       |           |       |
| 337 | Oxyfluorfen                       |             |       |          |       |           |      | 82.64       | 8.04  | 139.39   | 4.01  | 109.04    | 10.28 |
| 338 | parathion                         |             |       |          |       |           |      | 101.24      | 15.99 | 143.59   | 6.23  | 104.73    | 9.27  |
| 339 | Parathion-Methyl                  |             |       |          |       |           |      | 76.16       | 15.33 | 161.04   | 27.37 | 97.21     | 7.94  |
| 340 | Pebulate                          | 84.13       | 16.25 | 92.33    | 9.43  | 90.96     | 2.39 | 91.61       | 13.64 | 94.24    | 8.63  | 98.79     | 3.98  |
| 341 | Penconazole                       |             |       | 80.57    | 15.00 | 86.72     | 7.75 | 90.50       | 10.09 | 89.49    | 4.28  | 86.05     | 3.97  |
| 342 | Penflufen                         | 95.35       | 2.96  | 95.64    | 6.22  | 88.50     | 3.80 |             |       |          |       |           |       |
| 343 | Penoxsulam                        | 77.66       | 5.65  | 77.71    | 8.41  | 75.79     | 5.63 |             |       |          |       |           |       |
| 344 | Pentanochlor                      | 97.15       | 3.74  | 99.82    | 5.88  | 90.44     | 2.72 | 97.87       | 10.80 | 85.25    | 14.23 | 92.62     | 6.69  |
| 345 | Penthiopyrad                      |             |       |          |       |           |      | 88.35       | 10.11 | 90.86    | 8.66  | 94.19     | 4.44  |
| 346 | Pentoxazone                       |             |       |          |       |           |      | 89.92       | 11.85 | 93.01    | 11.84 | 92.99     | 5.28  |
| 347 | Pethoxamid                        | 93.77       | 5.21  | 97.49    | 6.73  | 93.93     | 4.10 | 75.78       | 8.00  | 60.65    | 7.54  | 53.68     | 4.37  |
| 348 | Phenothrin                        |             |       |          |       |           |      | 66.16       | 10.71 | 73.96    | 7.34  | 76.61     | 7.00  |
| 349 | Phorate                           |             |       |          |       | 79.50     | 9.05 | 101.77      | 11.86 | 103.19   | 7.34  | 101.04    | 3.88  |
| 350 | Phorate-Sulfone                   | 89.83       | 4.47  | 100.72   | 7.86  | 100.26    | 5.45 | 85.22       | 16.64 | 98.41    | 8.03  | 99.62     | 2.83  |
| 351 | Phorate-Sulfoxide                 | 99.40       | 3.95  | 96.07    | 5.51  | 93.99     | 3.89 | 76.45       | 13.22 | 94.91    | 8.31  | 97.90     | 4.24  |
| 352 | Phosfolan                         | 91.77       | 2.99  | 90.95    | 5.45  | 86.17     | 2.48 | 84.45       | 21.48 | 85.79    | 7.48  | 91.46     | 3.71  |
| 353 | Phosfolan-Methyl                  | 88.16       | 1.65  | 89.76    | 4.07  | 83.23     | 2.34 |             |       |          |       |           |       |
| 354 | Phosphamidon                      | 90.99       | 4.91  | 97.31    | 5.36  | 92.72     | 4.06 |             |       |          |       |           |       |
| 355 | Phthalic Acid, Benzyl Butyl Ester | 90.83       | 5.32  | 104.68   | 12.40 | 90.46     | 2.42 |             |       |          |       |           |       |
| 356 | Phthalic Acid, Bis-Butyl Ester    | 97.21       | 1.89  | 99.91    | 6.47  | 102.28    | 4.03 |             |       |          |       |           |       |
| 357 | Phthalide                         |             |       |          |       |           |      | 88.56       | 12.89 | 84.22    | 8.58  | 77.00     | 5.24  |
| 358 | Picolinafen                       | 84.93       | 4.97  | 77.50    | 6.29  | 69.97     | 3.81 | 83.96       | 14.53 | 85.74    | 12.22 | 81.44     | 4.93  |
| 359 | Piperalin                         | 15.87       | 12.44 | 15.53    | 10.84 | 14.58     | 8.84 | 24.06       | 21.83 | 20.12    | 18.53 | 15.96     | 10.12 |
| 360 | Pirimiphos-methyl-N-desethyl      | 93.68       | 3.55  | 93.15    | 5.73  | 88.88     | 3.53 | 83.42       | 10.78 | 83.82    | 6.31  | 90.47     | 3.94  |
| 361 | Plifenate                         |             |       |          |       |           |      | 78.09       | 11.22 | 109.38   | 11.27 | 95.77     | 3.30  |
| 362 | Primisulfuron-Methyl              | 61.25       | 7.11  | 61.72    | 8.89  | 57.12     | 5.10 |             |       |          |       |           |       |
| 363 | Prodiamine                        |             |       |          |       |           |      | 105.26      | 9.78  | 103.79   | 5.92  | 105.48    | 8.46  |

| No. | Pesticides              | GC-Q-TOF/MS |       |          |       |           |       | LC-Q-TOF/MS |       |          |       |           |      |
|-----|-------------------------|-------------|-------|----------|-------|-----------|-------|-------------|-------|----------|-------|-----------|------|
|     |                         | 10 µg/kg    |       | 20 µg/kg |       | 100 µg/kg |       | 10 µg/kg    |       | 20 µg/kg |       | 100 µg/kg |      |
|     |                         | REC%        | RSD%  | REC%     | RSD%  | REC%      | RSD%  | REC%        | RSD%  | REC%     | RSD%  | REC%      | RSD% |
| 364 | Profluralin             |             |       |          |       |           |       | 89.70       | 12.41 | 120.07   | 10.53 | 98.32     | 9.52 |
| 365 | Profoxydim              | 65.75       | 8.47  | 64.10    | 3.67  | 55.90     | 6.37  |             |       | 97.08    | 16.19 | 75.56     | 9.78 |
| 366 | Promecarb               | 91.65       | 18.68 | 96.85    | 15.87 | 96.67     | 2.71  |             |       | 150.87   | 12.39 | 97.08     | 9.14 |
| 367 | Prometon                | 88.57       | 2.09  | 90.35    | 5.24  | 84.97     | 2.97  | 85.23       | 11.24 | 95.20    | 3.13  | 89.97     | 3.24 |
| 368 | Prometryn               | 89.90       | 3.77  | 94.08    | 7.33  | 90.79     | 4.09  | 87.25       | 7.13  | 74.36    | 5.79  | 77.70     | 1.69 |
| 369 | Propachlor              | 91.09       | 6.95  | 99.80    | 7.92  | 96.75     | 5.23  | 77.84       | 47.38 | 98.56    | 6.15  | 95.88     | 9.55 |
| 370 | Propaquizafop           | 74.91       | 4.75  | 76.89    | 7.77  | 70.36     | 4.20  |             |       |          |       |           |      |
| 371 | Propazine               | 90.47       | 3.67  | 95.04    | 4.65  | 90.23     | 3.43  | 91.88       | 13.05 | 91.39    | 6.57  | 93.26     | 3.83 |
| 372 | Propisochlor            | 88.43       | 3.54  | 95.60    | 4.49  | 95.57     | 3.59  | 88.46       | 8.87  | 92.02    | 4.66  | 91.87     | 2.07 |
| 373 | Propyzamide             | 112.72      | 9.48  | 91.86    | 7.42  | 97.27     | 5.85  | 91.19       | 9.53  | 95.40    | 4.56  | 95.53     | 4.51 |
| 374 | Proquinazid             | 55.21       | 6.73  | 51.70    | 5.92  | 46.06     | 5.96  |             |       |          |       |           |      |
| 375 | Prosulfocarb            | 98.67       | 4.27  | 96.81    | 5.97  | 91.85     | 3.01  | 86.80       | 10.20 | 92.46    | 6.87  | 91.66     | 3.17 |
| 376 | Prosulfuron             | 55.24       | 8.64  | 55.59    | 14.83 | 53.11     | 9.04  |             |       |          |       |           |      |
| 377 | Prothioconazole         | 57.45       |       | 36.11    | 14.92 | 42.45     | 7.56  |             |       |          |       |           |      |
| 378 | Prothioconazole-desthio |             |       |          |       |           |       | 83.29       | 7.47  | 89.93    | 7.37  | 88.29     | 4.18 |
| 379 | Prothiofos              | 142.85      | 16.62 | 86.06    | 7.49  | 78.66     | 7.50  | 82.43       | 5.45  | 84.15    | 7.45  | 87.87     | 3.84 |
| 380 | Prothoate               | 99.29       | 1.60  | 104.45   | 5.01  | 99.19     | 4.14  |             |       |          |       |           |      |
| 381 | Pyracarbolid            | 96.77       | 2.97  | 95.76    | 2.10  | 89.49     | 1.49  | 98.01       | 14.31 | 97.36    | 11.27 | 93.81     | 5.45 |
| 382 | Pyraclufos              | 83.15       | 4.47  | 82.53    | 7.02  | 79.15     | 4.83  |             |       |          |       |           |      |
| 383 | Pyraflufen              |             |       |          |       | 5.58      | 8.35  |             |       |          |       |           |      |
| 384 | Pyraflufen-Ethyl        | 97.61       | 2.00  | 96.08    | 4.38  | 89.63     | 3.58  |             |       |          |       |           |      |
| 385 | Pyrametostrobin         | 90.34       | 2.61  | 91.67    | 5.82  | 88.75     | 4.11  |             |       |          |       |           |      |
| 386 | Pyraoxystrobin          | 75.47       | 3.82  | 77.61    | 7.88  | 70.29     | 5.02  |             |       |          |       |           |      |
| 387 | Pyrazosulfuron-Ethyl    | 63.95       | 5.76  | 65.64    | 9.84  | 61.76     | 6.78  |             |       |          |       |           |      |
| 388 | Pyrazoxyfen             | 96.06       | 4.30  | 97.92    | 4.90  | 89.78     | 4.04  |             |       |          |       |           |      |
| 389 | Pyribenzoxim            |             |       |          |       | 61.13     | 24.84 |             |       |          |       |           |      |
| 390 | Pyributicarb            | 102.08      | 3.43  | 97.13    | 3.04  | 90.01     | 2.92  | 89.12       | 12.72 | 89.19    | 8.78  | 93.60     | 4.98 |
| 391 | Pyridaphenthion         | 95.05       | 1.36  | 99.10    | 4.81  | 92.12     | 2.68  | 75.64       | 24.75 | 91.43    | 11.04 | 88.70     | 9.40 |

| No. | Pesticides             | GC-Q-TOF/MS |       |          |       |           |       | LC-Q-TOF/MS |       |          |       |           |       |
|-----|------------------------|-------------|-------|----------|-------|-----------|-------|-------------|-------|----------|-------|-----------|-------|
|     |                        | 10 µg/kg    |       | 20 µg/kg |       | 100 µg/kg |       | 10 µg/kg    |       | 20 µg/kg |       | 100 µg/kg |       |
|     |                        | REC%        | RSD%  | REC%     | RSD%  | REC%      | RSD%  | REC%        | RSD%  | REC%     | RSD%  | REC%      | RSD%  |
| 392 | Pyrifthalid            | 90.59       | 5.21  | 94.48    | 7.50  | 91.32     | 5.16  |             |       | 88.81    | 8.63  | 104.07    | 7.63  |
| 393 | Pyrimethanil           | 48.78       | 9.79  | 47.93    | 10.15 | 43.37     | 5.70  | 40.32       | 15.46 | 43.30    | 10.22 | 46.58     | 6.17  |
| 394 | Pyrimitate             | 93.76       | 3.27  | 94.81    | 5.19  | 89.50     | 3.63  |             |       |          |       |           |       |
| 395 | Pyrimorph              |             |       |          |       |           |       | 66.16       | 10.71 | 73.96    | 7.34  | 76.61     | 7.00  |
| 396 | Pyriofenone            |             |       |          |       |           |       | 83.81       | 7.74  | 91.30    | 6.74  | 91.16     | 3.35  |
| 397 | Pyriproxifen           | 95.44       | 2.11  | 91.91    | 2.44  | 83.63     | 2.53  | 78.35       | 6.70  | 89.23    | 12.26 | 91.92     | 6.08  |
| 398 | Pyrisoxazole           | 84.72       | 4.38  | 77.55    | 7.78  | 77.21     | 4.44  |             |       |          |       |           |       |
| 399 | Pyriithlobac           |             |       | 4.01     | 46.89 | 3.31      | 13.89 |             |       |          |       |           |       |
| 400 | Pyroquilon             | 93.15       | 7.86  | 91.28    | 7.03  | 83.29     | 2.82  | 87.20       | 17.77 | 94.03    | 7.73  | 88.18     | 5.70  |
| 401 | Quinoclamine           | 82.37       | 4.90  | 72.57    | 7.98  | 77.67     | 8.26  |             |       |          |       |           |       |
| 402 | Quinoxifen             | 63.92       | 4.06  | 61.51    | 6.54  | 55.30     | 3.69  | 61.05       | 13.60 | 65.12    | 10.54 | 67.90     | 3.17  |
| 403 | Quizalofop             |             |       | 7.37     | 15.66 | 10.03     | 11.38 |             |       |          |       |           |       |
| 404 | Quizalofop-Ethyl       | 82.97       | 5.11  | 83.86    | 5.17  | 77.15     | 4.61  |             |       |          |       | 74.93     | 11.54 |
| 405 | Rabenzazole            | 67.34       | 5.11  | 68.32    | 6.75  | 64.84     | 3.92  | 74.87       | 11.30 | 74.52    | 5.85  | 70.92     | 8.39  |
| 406 | Resmethrin             |             |       |          |       |           |       | 83.96       | 12.73 | 94.30    | 9.00  | 91.67     | 7.55  |
| 407 | Schradan               |             |       |          |       |           |       |             |       | 38.12    | 12.37 | 36.32     | 5.42  |
| 408 | Sebuthylazine          | 95.34       | 2.75  | 96.36    | 5.96  | 94.35     | 5.13  | 91.22       | 10.06 | 90.23    | 8.85  | 89.74     | 4.12  |
| 409 | Sebuthylazine-desethyl | 89.10       | 10.22 | 84.82    | 4.27  | 99.88     | 3.47  | 98.26       | 14.87 | 100.23   | 9.86  | 93.57     | 3.92  |
| 410 | Secbumeton             | 88.47       | 2.17  | 90.37    | 5.31  | 84.92     | 3.02  | 83.68       | 8.47  | 86.83    | 6.39  | 84.29     | 3.41  |
| 411 | Sedaxane               | 92.59       | 7.30  | 93.36    | 12.72 | 90.65     | 4.83  |             |       |          |       | 98.71     | 6.90  |
| 412 | Siduron                | 97.33       | 6.74  | 96.13    | 6.99  | 97.49     | 4.45  |             |       |          |       |           |       |
| 413 | Silthiofam             | 102.37      | 4.09  | 94.97    | 6.31  | 92.33     | 3.80  | 93.19       | 4.32  | 95.26    | 4.23  | 95.12     | 3.66  |
| 414 | Simazine               | 77.38       | 4.39  | 86.40    | 8.62  | 81.82     | 2.04  | 86.05       | 19.52 | 89.76    | 5.00  | 93.62     | 3.75  |
| 415 | Simeconazole           |             |       |          |       |           |       | 86.69       | 13.54 | 92.52    | 7.12  | 90.17     | 2.59  |
| 416 | Simeton                | 78.88       | 3.80  | 79.05    | 4.20  | 73.71     | 3.30  | 61.81       | 15.72 | 74.43    | 10.31 | 81.18     | 7.76  |
| 417 | Simetryn               | 81.21       | 2.97  | 83.59    | 5.82  | 79.20     | 3.46  | 78.83       | 13.03 | 79.81    | 8.33  | 79.38     | 4.66  |
| 418 | Spiroclufen            | 92.96       | 5.65  | 89.91    | 8.16  | 85.20     | 1.32  |             |       | 87.70    | 19.01 | 96.54     | 6.96  |
| 419 | Spiromesifen           | 99.43       | 4.67  | 94.92    | 3.70  | 86.56     | 2.56  | 84.62       | 8.59  | 87.06    | 3.58  | 99.32     | 3.22  |

| No. | Pesticides                   | GC-Q-TOF/MS |       |          |       |           |       | LC-Q-TOF/MS |       |          |       |           |      |
|-----|------------------------------|-------------|-------|----------|-------|-----------|-------|-------------|-------|----------|-------|-----------|------|
|     |                              | 10 µg/kg    |       | 20 µg/kg |       | 100 µg/kg |       | 10 µg/kg    |       | 20 µg/kg |       | 100 µg/kg |      |
|     |                              | REC%        | RSD%  | REC%     | RSD%  | REC%      | RSD%  | REC%        | RSD%  | REC%     | RSD%  | REC%      | RSD% |
| 420 | Spirotetramat                | 83.82       | 6.22  | 88.05    | 12.40 | 88.04     | 6.04  |             |       |          |       |           |      |
| 421 | Spirotetramat-enol-glucoside |             |       |          |       | 38.09     | 5.61  |             |       |          |       |           |      |
| 422 | Spirotetramat-keto-hydroxy   | 89.27       | 4.32  | 94.74    | 4.21  | 89.85     | 4.64  |             |       |          |       |           |      |
| 423 | Spirotetramat-mono-hydroxy   | 85.50       | 7.00  | 82.13    | 6.02  | 86.41     | 2.83  |             |       |          |       |           |      |
| 424 | Spiroxamine                  | 17.59       | 8.41  | 18.27    | 13.75 | 16.71     | 8.67  | 17.85       | 6.85  | 18.73    | 6.71  | 16.82     | 6.56 |
| 425 | Sulfallate                   |             |       |          |       |           |       | 80.89       | 12.20 | 104.42   | 6.12  | 93.61     | 3.62 |
| 426 | Sulfluramid                  |             |       |          |       |           |       | 96.62       | 4.73  | 96.39    | 5.49  | 94.09     | 3.54 |
| 427 | Sulfometuron-Methyl          | 93.42       | 2.31  | 86.60    | 3.07  | 81.26     | 2.68  |             |       |          |       |           |      |
| 428 | Sulfosulfuron                | 40.47       | 9.39  | 41.27    | 13.00 | 39.30     | 9.75  |             |       |          |       |           |      |
| 429 | Sulfotep                     | 99.86       | 4.35  | 100.68   | 2.69  | 94.55     | 3.55  | 95.56       | 5.77  | 101.17   | 5.57  | 97.03     | 2.66 |
| 430 | Sulprofos                    | 103.71      | 7.21  | 92.18    | 4.63  | 80.23     | 4.14  |             |       |          |       |           |      |
| 431 | TCMTB                        | 104.75      | 8.27  | 90.28    | 5.06  | 91.07     | 2.38  |             |       |          |       |           |      |
| 432 | Tebufenpyrad                 | 93.12       | 2.43  | 92.99    | 5.13  | 86.08     | 3.10  | 80.15       | 4.67  | 90.97    | 12.16 | 90.38     | 6.06 |
| 433 | Tebupirimfos                 | 100.67      | 6.22  | 97.10    | 6.06  | 91.16     | 2.91  | 98.44       | 4.87  | 93.53    | 5.20  | 93.40     | 3.05 |
| 434 | Tebutam                      | 95.86       | 3.46  | 97.30    | 7.02  | 93.94     | 4.23  | 98.61       | 5.28  | 100.54   | 2.51  | 98.33     | 4.33 |
| 435 | Tebuthiuron                  | 103.59      | 5.79  | 88.75    | 12.83 | 91.90     | 1.48  | 86.86       | 13.15 | 102.40   | 7.50  | 97.05     | 8.76 |
| 436 | Teflubenzuron                |             |       |          |       | 73.15     | 16.80 |             |       | 100.20   | 26.16 | 105.23    | 8.87 |
| 437 | Tembotrione                  | 17.17       | 23.53 | 17.04    | 15.62 | 16.14     | 9.25  |             |       |          |       |           |      |
| 438 | Temephos                     | 104.97      | 5.28  | 101.71   | 1.99  | 89.86     | 3.33  |             |       |          |       |           |      |
| 439 | Terbacil                     |             |       |          |       |           |       | 84.56       | 14.63 | 92.58    | 7.28  | 95.07     | 3.15 |
| 440 | Terbucarb                    | 85.35       | 9.95  | 92.65    | 5.92  | 91.94     | 3.26  | 90.62       | 3.54  | 96.52    | 3.51  | 94.74     | 3.06 |
| 441 | Terbufos                     |             |       |          |       |           |       | 88.71       | 7.41  | 95.18    | 5.62  | 93.48     | 3.59 |
| 442 | Terbufos-Sulfone             | 94.46       | 4.19  | 103.41   | 4.43  | 95.03     | 2.14  | 86.91       | 13.31 | 98.55    | 4.68  | 97.46     | 3.52 |
| 443 | Terbufos-Sulfoxide           | 89.70       | 5.22  | 92.32    | 7.14  | 93.44     | 5.05  |             |       |          |       |           |      |
| 444 | Terbumeton                   | 89.37       | 3.91  | 90.95    | 6.03  | 84.51     | 11.52 | 88.13       | 9.84  | 95.30    | 5.91  | 85.63     | 4.33 |
| 445 | Terbutylazine                | 91.86       | 9.24  | 94.76    | 6.19  | 89.94     | 3.58  | 88.62       | 7.32  | 93.38    | 6.19  | 92.33     | 3.94 |
| 446 | Terbutryn                    | 91.44       | 4.63  | 92.76    | 6.09  | 88.59     | 4.33  | 83.03       | 5.74  | 88.70    | 4.85  | 89.47     | 2.45 |
| 447 | Tetraconazole                | 92.12       | 4.44  | 94.88    | 4.51  | 91.51     | 4.37  | 91.17       | 7.63  | 91.06    | 7.32  | 92.13     | 2.74 |

| No. | Pesticides            | GC-Q-TOF/MS |       |          |       |           |       | LC-Q-TOF/MS |       |          |       |           |       |
|-----|-----------------------|-------------|-------|----------|-------|-----------|-------|-------------|-------|----------|-------|-----------|-------|
|     |                       | 10 µg/kg    |       | 20 µg/kg |       | 100 µg/kg |       | 10 µg/kg    |       | 20 µg/kg |       | 100 µg/kg |       |
|     |                       | REC%        | RSD%  | REC%     | RSD%  | REC%      | RSD%  | REC%        | RSD%  | REC%     | RSD%  | REC%      | RSD%  |
| 448 | Tetrasul              |             |       |          |       |           |       | 67.80       | 10.50 | 72.40    | 6.53  | 69.02     | 5.49  |
| 449 | Thenylchlor           | 102.34      | 3.52  | 98.46    | 7.59  | 92.95     | 4.84  | 84.13       | 19.68 | 101.29   | 5.40  | 100.93    | 2.41  |
| 450 | Thiazafluron          | 101.15      | 4.02  | 93.79    | 4.17  | 92.90     | 2.38  |             |       |          |       |           |       |
| 451 | Thiazopyr             | 101.47      | 1.82  | 99.65    | 3.88  | 91.40     | 2.97  | 99.88       | 4.65  | 93.86    | 4.38  | 95.43     | 3.47  |
| 452 | Thifluzamide          |             |       |          |       | 102.77    | 5.77  | 89.13       | 8.11  | 95.07    | 5.84  | 94.37     | 4.10  |
| 453 | Thiobencarb           | 93.51       | 5.11  | 94.36    | 6.54  | 91.97     | 2.18  | 93.34       | 10.13 | 97.68    | 7.18  | 92.86     | 3.76  |
| 454 | Thiodicarb            | 83.23       | 3.16  | 86.18    | 7.00  | 82.91     | 4.12  |             |       |          |       |           |       |
| 455 | Thiofanox             |             |       |          |       | 62.68     | 16.65 | 109.62      | 17.53 | 73.61    | 18.36 | 93.32     | 2.21  |
| 456 | Thiofanox-Sulfone     | 74.01       | 4.72  | 109.01   | 47.16 | 82.08     | 4.92  |             |       |          |       |           |       |
| 457 | Thiometon             |             |       |          |       |           |       | 82.82       | 7.92  | 87.96    | 8.68  | 86.69     | 3.17  |
| 458 | Thionazin             | 90.63       | 5.98  | 94.40    | 4.67  | 95.19     | 4.45  |             |       |          |       |           |       |
| 459 | Tiadinil              | 68.69       | 14.95 | 89.64    | 6.17  | 81.20     | 11.88 |             |       |          |       |           |       |
| 460 | Tiocarbazil           | 101.01      | 3.32  | 93.22    | 2.85  | 83.11     | 2.22  | 91.54       | 10.12 | 93.80    | 7.38  | 86.68     | 3.40  |
| 461 | Tolclofos-Methyl      | 94.67       | 27.51 | 111.60   | 9.09  | 88.41     | 7.66  | 88.68       | 6.32  | 94.98    | 6.09  | 94.11     | 3.31  |
| 462 | Tolfenpyrad           | 91.72       | 2.87  | 90.15    | 5.20  | 82.07     | 3.10  |             |       |          |       | 86.25     | 10.55 |
| 463 | trans-Diallate        |             |       |          |       |           |       | 90.19       | 15.21 | 102.26   | 9.05  | 100.56    | 6.58  |
| 464 | triallate             | 114.35      | 14.44 | 84.87    | 11.81 | 88.02     | 7.13  | 87.97       | 8.82  | 91.81    | 4.04  | 88.32     | 4.11  |
| 465 | Triamiphos            | 82.28       | 4.47  | 84.14    | 6.03  | 80.41     | 2.86  | 76.72       | 18.25 | 79.90    | 7.35  | 80.67     | 5.85  |
| 466 | Triapthenol           | 89.15       | 4.44  | 92.66    | 6.09  | 89.29     | 3.53  | 89.63       | 11.98 | 92.63    | 5.63  | 92.75     | 2.99  |
| 467 | Triasulfuron          | 84.77       | 3.27  | 83.67    | 7.11  | 82.64     | 4.00  |             |       |          |       |           |       |
| 468 | Tribufos              | 93.01       | 2.36  | 88.89    | 4.41  | 81.21     | 2.59  | 85.09       | 6.58  | 89.05    | 6.64  | 87.32     | 2.52  |
| 469 | Trichloronat          |             |       |          |       |           |       | 83.02       | 3.73  | 83.32    | 5.86  | 84.66     | 3.02  |
| 470 | Triclopyricarb        |             |       | 120.85   | 7.75  | 89.39     | 6.31  |             |       |          |       |           |       |
| 471 | Trietazine            | 89.00       | 3.74  | 91.56    | 6.41  | 88.31     | 3.87  | 90.01       | 9.65  | 95.16    | 7.78  | 90.76     | 3.88  |
| 472 | Trifloxystrobin       | 98.54       | 1.50  | 99.64    | 3.77  | 90.55     | 2.79  | 111.02      | 11.10 | 102.74   | 9.08  | 85.67     | 3.28  |
| 473 | Triflumizole          | 92.07       | 2.00  | 89.92    | 3.79  | 81.76     | 2.81  | 95.69       | 7.61  | 85.61    | 3.99  | 86.77     | 4.28  |
| 474 | Trifluralin           |             |       |          |       |           |       | 102.37      | 6.90  | 116.01   | 7.74  | 98.51     | 7.34  |
| 475 | Triflusulfuron-Methyl | 78.06       | 6.06  | 80.84    | 9.03  | 76.37     | 5.13  |             |       |          |       |           |       |

| No. | Pesticides             | GC-Q-TOF/MS |       |          |       |           |       | LC-Q-TOF/MS |      |          |       |           |      |
|-----|------------------------|-------------|-------|----------|-------|-----------|-------|-------------|------|----------|-------|-----------|------|
|     |                        | 10 µg/kg    |       | 20 µg/kg |       | 100 µg/kg |       | 10 µg/kg    |      | 20 µg/kg |       | 100 µg/kg |      |
|     |                        | REC%        | RSD%  | REC%     | RSD%  | REC%      | RSD%  | REC%        | RSD% | REC%     | RSD%  | REC%      | RSD% |
| 476 | Tri-Isobutyl Phosphate | 90.56       | 6.25  | 95.01    | 6.61  | 91.84     | 4.71  | 90.90       | 6.22 | 94.40    | 7.04  | 93.05     | 3.54 |
| 477 | Trinexapac-Ethyl       | 73.47       | 13.80 | 66.69    | 9.22  | 67.08     | 4.52  |             |      |          |       |           |      |
| 478 | Triticonazole          | 95.33       | 14.01 | 70.34    | 8.89  | 75.73     | 15.02 |             |      | 75.26    | 11.12 | 84.87     | 5.11 |
| 479 | Tritosulfuron          |             |       | 21.55    | 21.38 | 35.50     | 8.04  |             |      |          |       |           |      |
| 480 | Uniconazole            | 91.57       | 3.15  | 86.07    | 3.70  | 83.90     | 3.33  | 85.10       | 9.80 | 87.94    | 7.44  | 85.21     | 5.23 |
| 481 | Vernolate              | 82.14       | 11.17 | 98.50    | 13.87 | 92.13     | 3.04  | 107.44      | 5.07 | 91.72    | 7.37  | 88.92     | 6.27 |
| 482 | Zoxamide               | 97.85       | 3.11  | 94.64    | 4.72  | 90.47     | 3.26  | 81.77       | 3.74 | 75.59    | 5.28  | 75.03     | 1.77 |
